# Supplementary material for: Chemoproteomic profiling of targets of lipid-derived electrophiles by bioorthogonal aminooxy probe
Source: PubMed Central journal article supplement — Redox Biol. 2017 Apr 5;12:712–8. doi: 10.1016/j.redox.2017.04.001 (PMC5390668; doi:10.1016/j.redox.2017.04.001), 2017-04-05
Supplement: mmc1.pdf [file mmc1.pdf]

Supplementary table 1: Identification of HNE-modified proteins by reductive dimethylation (RD)-ABPP

| uniprot | protein name | ratio#01 | ratio#02 | ratio#03 | average | uniprot | protein name | ratio#01 | ratio#02 | ratio#03 | average | uniprot | protein name | ratio#01 | ratio#02 | ratio#03 | average |
|---------|--------------|----------|----------|----------|---------|---------|--------------|----------|----------|----------|---------|---------|--------------|----------|----------|----------|---------|
| Q9Y2I8  | WDR37        | 15       | 15       | 15       | 15.0    | Q9NRC1  | ST7          | 15       | 15       | 15       | 15.0    | Q9UHR6  | ZNHIT2       | 15       | 15       | 15       | 15.0    |
| Q9NV56  | MRGBP        | 15       | 15       | 15       | 15.0    | Q70CQ3  | USP30        | 15       | 15       | 15       | 15.0    | Q96GX5  | MASTL        | 15       | 15       | 15       | 15.0    |
| Q14012  | CAMK1        | 15       | 15       | 15       | 15.0    | Q13242  | SRSF9        | 15       | 15       | 15       | 15.0    | P0C2W1  | FBXO45       | 15       | 15       | 15       | 15.0    |
| Q35XY8  | ARL13B       | 15       | 15       | 15       | 15.0    | Q9H4B0  | OSGEP1       | 15       | 15       | 15       | 15.0    | Q96H35  | RBM18        | 15       | 15       | 15       | 15.0    |
| O43913  | ORC5         | 15       | 15       | 15       | 15.0    | Q14CB8  | ARHGAP19     | 15       | 15       | 15       | 15.0    | Q5T5X7  | BEND3        | 15       | 15       | 15       | 15.0    |
| Q5BKX5  | C19orf54     | 15       | 15       | 15       | 15.0    | O60232  | SSSCA1       | 15       | 15       | 15       | 15.0    | O95873  | C6orf47      | 15       | 15       | 15       | 15.0    |
| Q9Y4B4  | RAD54L2      | 15       | 15       | 15       | 15.0    | Q9H0E3  | SAP130       | 15       | 15       | 15       | 15.0    | O94898  | LRIG2        | 15       | 15       | 15       | 15.0    |
| Q86UW6  | N4BP2        | 15       | 15       | 15       | 15.0    | Q9UHK0  | NUFIP1       | 15       | 15       | 15       | 15.0    | P10586  | PTPRF        | 15       | 15       | 15       | 15.0    |
| Q9Y281  | CFL2         | 15       | 15       | 15       | 15.0    | Q13163  | MAP2K5       | 15       | 15       | 15       | 15.0    | Q8NDZ2  | C5orf25      | 15       | 15       | 15       | 15.0    |
| Q16698  | DECRC1       | 15       | 15       | 15       | 15.0    | P50552  | VASP         | 15       | 15       | 15       | 15.0    | O95619  | YEATS4       | 15       | 15       | 15       | 15.0    |
| Q9NW75  | GPATCH2      | 15       | 15       | 15       | 15.0    | O75494  | SRSF10       | 15       | 15       | 15       | 15.0    | Q9UMY4  | SNX12        | 15       | 15       | 15       | 15.0    |
| Q5H8A4  | PIGG         | 15       | 15       | 15       | 15.0    | Q13356  | PPIL2        | 15       | 15       | 15       | 15.0    | Q9UNH7  | SNX6         | 15       | 15       | 15       | 15.0    |
| O96011  | PEX11B       | 15       | 15       | 15       | 15.0    | Q92503  | SEC14L1      | 15       | 15       | 15       | 15.0    | O00483  | NDUFA4       | 15       | 15       | 15       | 15.0    |
| O14936  | CASK         | 15       | 15       | 15       | 15.0    | Q5VTR2  | RNF20        | 15       | 15       | 15       | 15.0    | Q8N2G8  | GHDC         | 15       | 15       | 15       | 15.0    |
| Q9HD26  | GOPC         | 15       | 15       | 15       | 15.0    | Q6PIW4  | FIGLN1       | 15       | 15       | 15       | 15.0    | Q9NUP1  | CNO          | 15       | 15       | 15       | 15.0    |
| Q8IWA4  | MFN1         | 15       | 15       | 15       | 15.0    | Q9H0E9  | BRD8         | 15       | 15       | 15       | 15.0    | Q14596  | NBR1         | 15       | 15       | 15       | 15.0    |
| Q2TAL8  | QRICH1       | 15       | 15       | 15       | 15.0    | O75147  | OBSL1        | 15       | 15       | 15       | 15.0    | Q9NWK9  | ZNHIT6       | 15       | 15       | 15       | 15.0    |
| Q9NW68  | BSDC1        | 15       | 15       | 15       | 15.0    | Q9NRX1  | PNO1         | 15       | 15       | 15       | 15.0    | P28702  | RXR8         | 15       | 15       | 15       | 15.0    |
| Q9N0Q8  | TIGAR        | 15       | 15       | 15       | 15.0    | Q9BQ61  | C19orf43     | 15       | 15       | 15       | 15.0    | Q9P0K8  | FOXJ2        | 15       | 15       | 15       | 15.0    |
| Q99595  | TIMM17A      | 15       | 15       | 15       | 15.0    | Q86Y37  | CACUL1       | 15       | 15       | 15       | 15.0    | A3KMH1  | VWA8         | 15       | 15       | 15       | 15.0    |
| Q9UGK8  | SERGEF       | 15       | 15       | 15       | 15.0    | Q9Y3D0  | FAM96B       | 15       | 15       | 15       | 15.0    | Q9NWM3  | CUEDC1       | 15       | 15       | 15       | 15.0    |
| Q9NRH2  | SNRK         | 15       | 15       | 15       | 15.0    | Q9Y5X3  | SNX5         | 15       | 15       | 15       | 15.0    | E2QRD5  | 15orf38-AP3S | 15       | 15       | 15       | 15.0    |
| Q96SB4  | SRPK1        | 15       | 15       | 15       | 15.0    | O75044  | SRGAP2       | 15       | 15       | 15       | 15.0    | Q86W92  | PPF1BP1      | 15       | 15       | 15       | 15.0    |
| Q9UK97  | FBX09        | 15       | 15       | 15       | 15.0    | P55210  | CASP7        | 15       | 15       | 15       | 15.0    | Q9Y3B2  | EXOSC1       | 15       | 15       | 15       | 15.0    |
| Q14934  | NFATC4       | 15       | 15       | 15       | 15.0    | P00519  | ABL1         | 15       | 15       | 15       | 15.0    | Q7Z6K3  | PTAR1        | 15       | 15       | 15       | 15.0    |
| Q9NUL3  | STAU2        | 15       | 15       | 15       | 15.0    | Q96KA5  | CLPTM1L      | 15       | 15       | 15       | 15.0    | Q7Z5K2  | WAPAL        | 15       | 15       | 15       | 15.0    |
| R86790  | CCZ1B        | 15       | 15       | 15       | 15.0    | Q99708  | RBBP8        | 15       | 15       | 15       | 15.0    | Q9P2S5  | WRAP73       | 15       | 15       | 15       | 15.0    |
| Q86YH6  | PDSS2        | 15       | 15       | 15       | 15.0    | Q15392  | DHCR24       | 15       | 15       | 15       | 15.0    | Q96E15  | TCEAL4       | 15       | 15       | 15       | 15.0    |
| Q9NTM9  | CUTC         | 15       | 15       | 15       | 15.0    | Q8IXH7  | TH1L         | 15       | 15       | 15       | 15.0    | Q7Z2T5  | TRMT1L       | 15       | 15       | 15       | 15.0    |
| Q9UH17  | APOBEC3B     | 15       | 15       | 15       | 15.0    | O43379  | WDR62        | 15       | 15       | 15       | 15.0    | Q96A26  | FAM162A      | 15       | 15       | 15       | 15.0    |
| Q96S11  | KCTD15       | 15       | 15       | 15       | 15.0    | Q9NQW6  | ANLN         | 15       | 15       | 15       | 15.0    | O60613  | 15-Sep       | 15       | 15       | 15       | 15.0    |
| O60502  | MGEA5        | 15       | 15       | 15       | 15.0    | Q9HA47  | UCK1         | 15       | 15       | 15       | 15.0    | Q68CL5  | TGGS2        | 15       | 15       | 15       | 15.0    |
| O95382  | MAP3K6       | 15       | 15       | 15       | 15.0    | P13073  | COX411       | 15       | 15       | 15       | 15.0    | Q9UQR0  | SCML2        | 15       | 15       | 15       | 15.0    |
| O15318  | POLR3G       | 15       | 15       | 15       | 15.0    | Q8NOZ8  | PUSL1        | 15       | 15       | 15       | 15.0    | O95149  | SNUPN        | 15       | 15       | 15       | 15.0    |
| P11234  | RALB         | 15       | 15       | 15       | 15.0    | Q70253  | FRA10AC1     | 15       | 15       | 15       | 15.0    | P42566  | EPS15        | 15       | 15       | 15       | 15.0    |
| Q96B23  | C18orf25     | 15       | 15       | 15       | 15.0    | Q8NEY1  | NAV1         | 15       | 15       | 15       | 15.0    | Q96BD8  | SKA1         | 15       | 15       | 15       | 15.0    |
| Q9H078  | CLPB         | 15       | 15       | 15       | 15.0    | O94842  | TOX4         | 15       | 15       | 15       | 15.0    | Q9H0K6  | PUS7L        | 15       | 15       | 15       | 15.0    |
| P40937  | RFC5         | 15       | 15       | 15       | 15.0    | Q96Q11  | TRNT1        | 15       | 15       | 15       | 15.0    | Q86UE8  | TLK2         | 15       | 15       | 15       | 15.0    |
| Q8NHU6  | TDRD7        | 15       | 15       | 15       | 15.0    | Q86UD0  | SAPCD2       | 15       | 15       | 15       | 15.0    | P01892  | HLA-A        | 15       | 15       | 15       | 15.0    |
| Q7Z7E8  | UBE2Q1       | 15       | 15       | 15       | 15.0    | O15541  | RNF113A      | 15       | 15       | 15       | 15.0    | O60547  | GMDS         | 15       | 15       | 15       | 15.0    |
| P01891  | HLA-A        | 15       | 15       | 15       | 15.0    | Q8TBM8  | DNAJB14      | 15       | 15       | 15       | 15.0    | Q9HB40  | SCPEP1       | 15       | 15       | 15       | 15.0    |
| Q86WX3  | RPS19BP1     | 15       | 15       | 15       | 15.0    | P29590  | PML          | 15       | 15       | 15       | 15.0    | Q96RR4  | CAMKK2       | 15       | 15       | 15       | 15.0    |
| Q5T8P6  | RBM26        | 15       | 15       | 15       | 15.0    | O6WQC1  | MPRIP        | 15       | 15       | 15       | 15.0    | Q8NE62  | CHDH         | 15       | 15       | 15       | 15.0    |
| P18846  | ATF1         | 15       | 15       | 15       | 15.0    | O75152  | ZC3H11A      | 15       | 15       | 15       | 15.0    | O15063  | KIAA0355     | 15       | 15       | 15       | 15.0    |
| Q92547  | TOPBP1       | 15       | 15       | 15       | 15.0    | O15075  | DCLK1        | 15       | 15       | 15       | 15.0    | I3L290  | RAD17        | 15       | 15       | 15       | 15.0    |
| Q86SZ2  | TRAPPC6B     | 15       | 15       | 15       | 15.0    | Q9NXL9  | MCM9         | 15       | 15       | 15       | 15.0    | Q9Y5Z9  | UBIAD1       | 15       | 15       | 15       | 15.0    |
| G3V3G9  | DCAF8        | 15       | 15       | 15       | 15.0    | Q86UT6  | NLRX1        | 15       | 15       | 15       | 15.0    | O95299  | NDUFA10      | 15       | 15       | 15       | 15.0    |
| P12235  | SLC25A4      | 15       | 15       | 15       | 15.0    | Q8N6R0  | METTL13      | 15       | 15       | 15       | 15.0    | Q9H8K7  | C10orf88     | 15       | 15       | 15       | 15.0    |
| Q15005  | SPCS2        | 15       | 15       | 15       | 15.0    | Q5C924  | NOM1         | 15       | 15       | 15       | 15.0    | Q9Y3D8  | TA9          | 15       | 15       | 15       | 15.0    |
| Q9Y3C1  | NOP16        | 15       | 15       | 15       | 15.0    | O43741  | PRKAB2       | 15       | 15       | 15       | 15.0    | Q96KB5  | PBK          | 15       | 15       | 15       | 15.0    |
| O60762  | DPM1         | 15       | 15       | 15       | 15.0    | Q9UID6  | ZNF639       | 15       | 15       | 15       | 15.0    | Q9P2Y5  | UVRAG        | 15       | 15       | 15       | 15.0    |
| Q2KHR3  | QSER1        | 15       | 15       | 15       | 15.0    | Q96PZ0  | PUS7         | 15       | 15       | 15       | 15.0    | Q8N3P4  | VPS8         | 15       | 15       | 15       | 15.0    |
| Q8E011  | INTS3        | 15       | 15       | 15       | 15.0    | Q96I20  | PAWR         | 15       | 15       | 15       | 15.0    | Q92805  | GOLGA1       | 15       | 15       | 15       | 15.0    |
| Q96E8   | DTNBP1       | 15       | 15       | 15       | 15.0    | Q9Y5K6  | CDZAP        | 15       | 15       | 15       | 15.0    | Q9H2V7  | SPNS1        | 15       | 15       | 15       | 15.0    |
| P18085  | ARF4         | 15       | 15       | 15       | 15.0    | Q86VQ1  | GLCCI1       | 15       | 15       | 15       | 15.0    | O00273  | DFFA         | 15       | 15       | 15       | 15.0    |
| Q96B8   | FAM105B      | 15       | 15       | 15       | 15.0    | Q99471  | PFDN5        | 15       | 15       | 15       | 15.0    | Q16254  | E2F4         | 15       | 15       | 15       | 15.0    |
| P53701  | HCCS         | 15       | 15       | 15       | 15.0    | O95644  | NFATC1       | 15       | 15       | 15       | 15.0    | Q13257  | MAD2L1       | 15       | 15       | 15       | 15.0    |
| Q16204  | CCDC6        | 15       | 15       | 15       | 15.0    | Q6DD88  | ATL3         | 15       | 15       | 15       | 15.0    | Q9Y305  | ACOT9        | 15       | 15       | 15       | 15.0    |
| Q7Z7A3  | CTU1         | 15       | 15       | 15       | 15.0    | O60343  | TBC1D4       | 15       | 15       | 15       | 15.0    | Q9UIU6  | SIX4         | 15       | 15       | 15       | 15.0    |
| Q92544  | TM9SF4       | 15       | 15       | 15       | 15.0    | O60566  | BUB1B        | 15       | 15       | 15       | 15.0    | Q8WUW7  | UBTD2        | 15       | 15       | 15       | 15.0    |
| Q9NOZ5  | STARD7       | 15       | 15       | 15       | 15.0    | O5HYK3  | COQ5         | 15       | 15       | 15       | 15.0    | P51956  | NEK3         | 15       | 15       | 15       | 15.0    |
| P27540  | ARNT         | 15       | 15       | 15       | 15.0    | Q9NZ01  | TECR         | 15       | 15       | 15       | 15.0    | G3V325  | PTCD1        | 15       | 15       | 15       | 15.0    |
| Q86U44  | METTL3       | 15       | 15       | 15       | 15.0    | O75319  | DUSP11       | 15       | 15       | 15       | 15.0    | P53602  | MVD          | 15       | 15       | 15       | 15.0    |
| Q9H061  | TMEM126A     | 15       | 15       | 15       | 15.0    | Q8IU85  | CAMK1D       | 15       | 15       | 15       | 15.0    | Q12834  | CDC20        | 15       | 15       | 15       | 15.0    |
| Q99707  | MTR          | 15       | 15       | 15       | 15.0    | Q5SY16  | NOL9         | 15       | 15       | 15       | 15.0    | Q96BU1  | S100BPP      | 15       | 15       | 15       | 15.0    |
| Q9H4L5  | OSBPL3       | 15       | 15       | 15       | 15.0    | P31751  | AKT2         | 15       | 15       | 15       | 15.0    | P05166  | PCCB         | 15       | 15       | 15       | 15.0    |
| Q95985  | TOP3B        | 15       | 15       | 15       | 15.0    | P17812  | CTPS1        | 15       | 15       | 15       | 15.0    | Q9NRG9  | AAAS         | 15       | 15       | 15       | 15.0    |
| Q16644  | MAPKAPK3     | 15       | 15       | 15       | 15.0    | Q8NBU5  | ATAD1        | 15       | 15       | 15       | 15.0    | P27348  | YWHAQ        | 15       | 15       | 15       | 15.0    |
| O75446  | SAP30        | 15       | 15       | 15       | 15.0    | P49454  | CENPF        | 15       | 15       | 15       | 15.0    | P12236  | SLC25A6      | 15       | 15       | 15       | 15.0    |
| Q9Y676  | MRPS18B      | 15       | 15       | 15       | 15.0    | Q96MG7  | NDNL2        | 15       | 15       | 15       | 15.0    | Q9Y2D4  | EXOC6B       | 15       | 15       | 15       | 15.0    |
| Q6NZY4  | ZCCHC8       | 15       | 15       | 15       | 15.0    | Q86T24  | ZBTB33       | 15       | 15       | 15       | 15.0    | Q9Y6I4  | USP3         | 15       | 15       | 15       | 15.0    |
| Q92785  | DPF2         | 15       | 15       | 15       | 15.0    | O15379  | HDAC3        | 15       | 15       | 15       | 15.0    | Q7L5N7  | LPCAT2       | 15       | 15       | 15       | 15.0    |
| P08240  | SRPR         | 15       | 15       | 15       | 15.0    | O95396  | MOC53        | 15       | 15       | 15       | 15.0    | Q15185  | PTGES3       | 15       | 15       | 15       | 15.0    |
| P55212  | CASP6        | 15       | 15       | 15       | 15.0    | P13498  | CYBA         | 15       | 15       | 15       | 15.0    | Q0PNE2  | ELP6         | 15       | 15       | 15       | 15.0    |
| Q9Y6I9  | TEX264       | 15       | 15       | 15       | 15.0    | Q9Y6I8  | NCOR2        | 15       | 15       | 15       | 15.0    | Q9H413  | TRABD        | 15       | 15       | 15       | 15.0    |
| Q8IW35  | CEP97        | 15       | 15       | 15       | 15.0    | P35813  | PPM1A        | 15       | 15       | 15       | 15.0    | Q92597  | NDRG1        | 15       | 15       | 15       | 15.0    |
| Q75529  | TAF5L        | 15       | 15       | 15       | 15.0    | O15031  | PLXNB2       | 15       | 15       | 15       | 15.0    | Q6IAA8  | LAMTOR1      | 15       | 15       | 15       | 15.0    |
| Q06330  | RBPJ         | 15       | 15       | 15       | 15.0    | Q86Y07  | VRK2         | 15       | 15       | 15       | 15.0    | Q8TBN0  | RAB31L1      | 15       | 15       | 15       | 15.0    |
| P15923  | TCF3         | 15       | 15       | 15       | 15.0    | Q9UBZ4  | APEX2        | 15       | 15       | 15       | 15.0    | Q14679  | TLL4         | 15       | 15       | 15       | 15.0    |
| P36969  | GPX4         | 15       | 15       | 15       | 15.0    | O75175  | CNOT3        | 15       | 15       | 15       | 15.0    | Q9Y277  | VDAC3        | 15       | 15       | 15       | 15.0    |
| Q9BWH6  | RPAP1        | 15       | 15       | 15       | 15.0    | P78417  | GSTO1        | 15</     |          |          |         |         |              |          |          |          |         |

| uniprot | protein name | ratio#01 | ratio#02 | ratio#03 | average | uniprot | protein name | ratio#01 | ratio#02 | ratio#03 | average | uniprot | protein name | ratio#01 | ratio#02 | ratio#03 | average |
|---------|--------------|----------|----------|----------|---------|---------|--------------|----------|----------|----------|---------|---------|--------------|----------|----------|----------|---------|
| Q96GD4  | AURKB        | 15       | 15       | 15       | 15.0    | Q9UJW0  | DCTN4        | 15       | 15       | 15       | 15.0    | P27707  | DCK          | 15       | 15       | 15       | 15.0    |
| Q9BTY2  | FUCA2        | 15       | 15       | 15       | 15.0    | Q9H845  | ACAD9        | 15       | 15       | 15       | 15.0    | Q9NVE7  | PANK4        | 15       | 15       | 15       | 15.0    |
| Q9Y5A7  | NUB1         | 15       | 15       | 15       | 15.0    | Q9NX47  | 5-Mar        | 15       | 15       | 15       | 15.0    | Q3ZCM7  | TUBB8        | 15       | 15       | 15       | 15.0    |
| Q66LE6  | PPP2R2D      | 15       | 15       | 15       | 15.0    | Q8TD19  | NEK9         | 15       | 15       | 15       | 15.0    | Q9NRL3  | STRN4        | 15       | 15       | 15       | 15.0    |
| Q96008  | TOMM40       | 15       | 15       | 15       | 15.0    | Q9BQP7  | C20orf72     | 15       | 15       | 15       | 15.0    | Q16625  | OCLN         | 15       | 15       | 15       | 15.0    |
| Q15025  | TNIP1        | 15       | 15       | 15       | 15.0    | Q96A33  | CCDC47       | 15       | 15       | 15       | 15.0    | Q8TAD4  | SLC30A5      | 15       | 15       | 15       | 15.0    |
| Q92794  | KAT6A        | 15       | 15       | 15       | 15.0    | P31153  | MAT2A        | 15       | 15       | 15       | 15.0    | Q8N5Y8  | PARP16       | 15       | 15       | 15       | 15.0    |
| Q13162  | PRDX4        | 15       | 15       | 15       | 15.0    | P16383  | GCFC2        | 15       | 15       | 15       | 15.0    | Q7Z5H3  | ARHGAP22     | 15       | 15       | 15       | 15.0    |
| Q95168  | NDUFB4       | 15       | 15       | 15       | 15.0    | Q9H9B1  | EHMT1        | 15       | 15       | 15       | 15.0    | Q9NX63  | CHCHD3       | 15       | 15       | 15       | 15.0    |
| P40424  | PBX1         | 15       | 15       | 15       | 15.0    | Q43823  | AKAP8        | 15       | 15       | 15       | 15.0    | Q9Y6A5  | TACC3        | 15       | 15       | 15       | 15.0    |
| Q96D53  | ADCK4        | 15       | 15       | 15       | 15.0    | P04183  | TK1          | 15       | 15       | 15       | 15.0    | Q15398  | DLGAP5       | 15       | 15       | 15       | 15.0    |
| Q96T51  | RUFY1        | 15       | 15       | 15       | 15.0    | O15381  | NVL          | 15       | 15       | 15       | 15.0    | O14867  | BACH1        | 15       | 15       | 15       | 15.0    |
| Q9N272  | STMN3        | 15       | 15       | 15       | 15.0    | Q8TD16  | BICD2        | 15       | 15       | 15       | 15.0    | Q96IK1  | BOD1         | 15       | 15       | 15       | 15.0    |
| Q9U110  | EIF2B4       | 15       | 15       | 15       | 15.0    | Q99615  | DNAJC7       | 15       | 15       | 15       | 15.0    | Q9BSD7  | NTPCR        | 15       | 15       | 15       | 15.0    |
| A4D1P6  | WDR91        | 15       | 15       | 15       | 15.0    | Q9UBQ5  | AIF3K        | 15       | 15       | 15       | 15.0    | Q9Y294  | ASF1A        | 15       | 15       | 15       | 15.0    |
| Q87AE8  | GADD45GIP1   | 15       | 15       | 15       | 15.0    | Q9NVC6  | MED17        | 15       | 15       | 15       | 15.0    | P10244  | MYBL2        | 15       | 15       | 15       | 15.0    |
| Q14318  | FKBP8        | 15       | 15       | 15       | 15.0    | O43175  | PHGDH        | 15       | 15       | 15       | 15.0    | Q5T1V6  | DDX59        | 15       | 15       | 15       | 15.0    |
| Q6P2C8  | MED27        | 15       | 15       | 15       | 15.0    | P78559  | MAP1A        | 15       | 15       | 15       | 15.0    | Q9UJ14  | HERC5        | 15       | 15       | 15       | 15.0    |
| Q6QNY0  | BLOC1S3      | 15       | 15       | 15       | 15.0    | Q9GZP4  | PITHD1       | 15       | 15       | 15       | 15.0    | Q9C0D5  | TANC1        | 15       | 15       | 15       | 15.0    |
| Q9NPL8  | TIMMDC1      | 15       | 15       | 15       | 15.0    | P48730  | CSNK1D       | 15       | 15       | 15       | 15.0    | Q9NWA0  | MED9         | 15       | 15       | 15       | 15.0    |
| Q69Y22  | CWF19L1      | 15       | 15       | 15       | 15.0    | Q9NPN81 | SARS2        | 15       | 15       | 15       | 15.0    | O75794  | CDC123       | 15       | 15       | 15       | 15.0    |
| Q8N4P2  | TTC30B       | 15       | 15       | 15       | 15.0    | Q9Y6M9  | NDUFB9       | 15       | 15       | 15       | 15.0    | O95456  | PSMG1        | 15       | 15       | 15       | 15.0    |
| Q9UHR5  | SAP30BP      | 15       | 15       | 15       | 15.0    | P13861  | PRKAR2A      | 15       | 15       | 15       | 15.0    | P25789  | PSMA4        | 15       | 15       | 15       | 15.0    |
| P31323  | PRKAR2B      | 15       | 15       | 15       | 15.0    | Q16799  | RTN1         | 15       | 15       | 15       | 15.0    | Q9BYW2  | STD2         | 15       | 15       | 15       | 15.0    |
| O75449  | KATNA1       | 15       | 15       | 15       | 15.0    | Q8NG31  | CASC5        | 15       | 15       | 15       | 15.0    | Q3SY69  | ALDH1L2      | 15       | 15       | 15       | 15.0    |
| Q9Y5Q8  | GTF3C5       | 15       | 15       | 15       | 15.0    | P17028  | ZNF24        | 15       | 15       | 15       | 15.0    | Q9BUP0  | EHD1         | 15       | 15       | 15       | 15.0    |
| Q9Y597  | KCTD3        | 15       | 15       | 15       | 15.0    | Q86T1P1 | PRUNE        | 15       | 15       | 15       | 15.0    | Q8N9N2  | ASCC1        | 15       | 15       | 15       | 15.0    |
| P04150  | NR3C1        | 15       | 15       | 15       | 15.0    | Q9BVA1  | TUBZ2B       | 15       | 15       | 15       | 15.0    | O60683  | PEX10        | 15       | 15       | 15       | 15.0    |
| Q8N5L8  | RPP25L       | 15       | 15       | 15       | 15.0    | Q99439  | CNN2         | 15       | 15       | 15       | 15.0    | Q9BW19  | KIFC1        | 15       | 15       | 15       | 15.0    |
| P15170  | GSPT1        | 15       | 15       | 15       | 15.0    | Q7Z2K8  | GPRIN1       | 15       | 15       | 15       | 15.0    | P50148  | GNAQ         | 15       | 15       | 15       | 15.0    |
| B4DLN1  | SLC25A10     | 15       | 15       | 15       | 15.0    | Q13501  | SQSTM1       | 15       | 15       | 15       | 15.0    | Q96RU2  | USP28        | 15       | 15       | 15       | 15.0    |
| Q5T2R2  | PDSS1        | 15       | 15       | 15       | 15.0    | Q9BYC9  | MRPL20       | 15       | 15       | 15       | 15.0    | Q9Y4W6  | AFG3L2       | 15       | 15       | 15       | 15.0    |
| Q7L9B9  | EEPD1        | 15       | 15       | 15       | 15.0    | Q00534  | CDK6         | 15       | 15       | 15       | 15.0    | Q9UJX4  | ANAPC5       | 15       | 15       | 15       | 15.0    |
| Q96T17  | MAP7D2       | 15       | 15       | 15       | 15.0    | Q9UHW5  | GNP3         | 15       | 15       | 15       | 15.0    | Q9BR61  | ACBD6        | 15       | 15       | 15       | 15.0    |
| Q9NZW5  | MPP6         | 15       | 15       | 15       | 15.0    | Q9ULV4  | CORO1C       | 15       | 15       | 15       | 15.0    | P12532  | CKMT1B       | 15       | 15       | 15       | 15.0    |
| P63092  | GNAS         | 15       | 15       | 15       | 15.0    | P68371  | TUBB4B       | 15       | 15       | 15       | 15.0    | Q5JWF2  | GNAS         | 15       | 15       | 15       | 15.0    |
| Q9U663  | ABCF2        | 15       | 15       | 15       | 15.0    | Q92989  | CLP1         | 15       | 15       | 15       | 15.0    | Q8WVB6  | CHTF18       | 15       | 15       | 15       | 15.0    |
| Q9Y546  | LRRRC42      | 15       | 15       | 15       | 15.0    | P55010  | EIF5         | 15       | 15       | 15       | 15.0    | Q9NX07  | TRNAU1AP     | 15       | 15       | 15       | 15.0    |
| O15091  | KIAA0391     | 15       | 15       | 15       | 15.0    | P49585  | PCYT1A       | 15       | 15       | 15       | 15.0    | P53611  | RABGGTB      | 15       | 15       | 15       | 15.0    |
| P45983  | MAPK8        | 15       | 15       | 15       | 15.0    | Q9BTE3  | MCMBP        | 15       | 15       | 15       | 15.0    | Q96GA3  | LTV1         | 15       | 15       | 15       | 15.0    |
| Q13155  | AIMP2        | 15       | 15       | 15       | 15.0    | Q9H8H0  | NOL11        | 15       | 15       | 15       | 15.0    | O00311  | CDC7         | 15       | 15       | 15       | 15.0    |
| Q9H974  | QTRTD1       | 15       | 15       | 15       | 15.0    | P07437  | TUBB         | 15       | 15       | 15       | 15.0    | Q86TB9  | PATL1        | 15       | 15       | 15       | 15.0    |
| P54132  | BLM          | 15       | 15       | 15       | 15.0    | Q5V7B9  | RNF220       | 15       | 15       | 15       | 15.0    | P54252  | ATXN3        | 15       | 15       | 15       | 15.0    |
| O43427  | FIBP         | 15       | 15       | 15       | 15.0    | Q9POU3  | SENP1        | 15       | 15       | 15       | 15.0    | Q9H6E4  | CCDC134      | 15       | 15       | 15       | 15.0    |
| Q9Y2X3  | NOP58        | 15       | 15       | 15       | 15.0    | P09936  | UCHL1        | 15       | 15       | 15       | 15.0    | Q9BWF3  | RBM4         | 15       | 15       | 15       | 15.0    |
| Q9H3K2  | GHITM        | 15       | 15       | 15       | 15.0    | O96017  | CHEK2        | 15       | 15       | 15       | 15.0    | Q2VPK5  | CTU2         | 15       | 15       | 15       | 15.0    |
| Q13509  | TUBB3        | 15       | 15       | 15       | 15.0    | P51587  | BRCA2        | 15       | 15       | 15       | 15.0    | Q96H20  | SNF8         | 15       | 15       | 15       | 15.0    |
| P60660  | MYL6         | 15       | 15       | 15       | 15.0    | Q01581  | HMGC51       | 15       | 15       | 15       | 15.0    | Q9HA65  | TBC1D17      | 15       | 15       | 15       | 15.0    |
| P53680  | AP2S1        | 15       | 15       | 15       | 15.0    | Q96EA4  | CCDC99       | 15       | 15       | 15       | 15.0    | Q6W2J9  | BCOR         | 15       | 15       | 15       | 15.0    |
| O00429  | DNM1L        | 15       | 15       | 15       | 15.0    | A6NKD9  | CCDC85C      | 15       | 15       | 15       | 15.0    | Q13561  | DCTN2        | 15       | 15       | 15       | 15.0    |
| P05386  | RPLP1        | 15       | 15       | 15       | 15.0    | Q9H2D1  | SLC25A32     | 15       | 15       | 15       | 15.0    | Q5SWX8  | ODR4         | 15       | 15       | 15       | 15.0    |
| Q8N9T8  | KRI1         | 15       | 15       | 15       | 15.0    | Q9BYB4  | GNB1L        | 15       | 15       | 15       | 15.0    | Q9UPR3  | SMG5         | 15       | 15       | 15       | 15.0    |
| Q96JC1  | VPS39        | 15       | 15       | 15       | 15.0    | Q6YN16  | HSDL2        | 15       | 15       | 15       | 15.0    | Q7Z569  | BRAP         | 15       | 15       | 15       | 15.0    |
| O76031  | CLPX         | 15       | 15       | 15       | 15.0    | A6NHL2  | TUBAL3       | 15       | 15       | 15       | 15.0    | Q96C92  | SDCCAG3      | 15       | 15       | 15       | 15.0    |
| P22087  | FBL          | 15       | 15       | 15       | 15.0    | O60664  | PLIN3        | 15       | 15       | 15       | 15.0    | O14734  | ACOT8        | 15       | 15       | 15       | 15.0    |
| Q9Y6G9  | DYNC1L1      | 15       | 15       | 15       | 15.0    | Q00752  | PPID         | 15       | 15       | 15       | 15.0    | Q8NFG4  | FLCN         | 15       | 15       | 15       | 15.0    |
| Q14241  | TCEB3        | 15       | 15       | 15       | 15.0    | Q9NS91  | RAD18        | 15       | 15       | 15       | 15.0    | Q13131  | PRKAA1       | 15       | 15       | 15       | 15.0    |
| P48643  | CCT5         | 15       | 15       | 15       | 15.0    | O16637  | SMN2         | 15       | 15       | 15       | 15.0    | E7EQZ4  | SMN1         | 15       | 15       | 15       | 15.0    |
| Q96R06  | SPAG5        | 15       | 15       | 15       | 15.0    | Q9H0B6  | KLC2         | 15       | 15       | 15       | 15.0    | Q9UK39  | CCRN4L       | 15       | 15       | 15       | 15.0    |
| Q96RS6  | NUDCD1       | 15       | 15       | 15       | 15.0    | Q13418  | ILK          | 15       | 15       | 15       | 15.0    | P63220  | RPS21        | 15       | 15       | 15       | 15.0    |
| Q6I9Y2  | THOC7        | 15       | 15       | 15       | 15.0    | Q9P035  | PTPLAD1      | 15       | 15       | 15       | 15.0    | Q9BZG1  | RAB34        | 15       | 15       | 15       | 15.0    |
| O00161  | SNAP23       | 15       | 15       | 15       | 15.0    | Q05639  | EEF1A2       | 15       | 15       | 15       | 15.0    | Q96MH6  | TMEM68       | 15       | 15       | 15       | 15.0    |
| Q7Z7H8  | MRPL10       | 15       | 15       | 15       | 15.0    | Q96FW1  | OTUB1        | 15       | 15       | 15       | 15.0    | Q9H7L9  | SUDS3        | 15       | 15       | 15       | 15.0    |
| Q8TAG9  | EXOC6        | 15       | 15       | 15       | 15.0    | Q96L73  | NSD1         | 15       | 15       | 15       | 15.0    | Q6ZW49  | PAXIP1       | 15       | 15       | 15       | 15.0    |
| Q7L1Q6  | BZW1         | 15       | 15       | 15       | 15.0    | P51654  | GPC3         | 15       | 15       | 15       | 15.0    | P40855  | PEX19        | 15       | 15       | 15       | 15.0    |
| Q02153  | GUCY1B3      | 15       | 15       | 15       | 15.0    | P48556  | PSMD8        | 15       | 15       | 15       | 15.0    | Q9H6D7  | HAUSA4       | 15       | 15       | 15       | 15.0    |
| Q96E52  | OMA1         | 15       | 15       | 15       | 15.0    | Q16740  | CLPP         | 15       | 15       | 15       | 15.0    | Q14344  | GNA13        | 15       | 15       | 15       | 15.0    |
| P61962  | DCAF7        | 15       | 15       | 15       | 15.0    | Q5SNT2  | TMEM201      | 15       | 15       | 15       | 15.0    | Q15208  | STK38        | 15       | 15       | 15       | 15.0    |
| Q6P444  | FAM54A       | 15       | 15       | 15       | 15.0    | Q9BRS2  | RIOK1        | 15       | 15       | 15       | 15.0    | Q86V13  | IQGAP3       | 15       | 15       | 15       | 15.0    |
| Q14684  | RRP1B        | 15       | 15       | 15       | 15.0    | O75880  | SCO1         | 15       | 15       | 15       | 15.0    | P07602  | PSAP         | 15       | 15       | 15       | 15.0    |
| O75616  | ERAL1        | 15       | 15       | 15       | 15.0    | O60563  | CNTN1        | 15       | 15       | 15       | 15.0    | Q9H2U2  | PPA2         | 15       | 15       | 15       | 15.0    |
| Q96E0M  | L3HYPDH      | 15       | 15       | 15       | 15.0    | P10398  | ARAF         | 15       | 15       | 15       | 15.0    | P48382  | RFX5         | 15       | 15       | 15       | 15.0    |
| Q8WWW4  | C2orf47      | 15       | 15       | 15       | 15.0    | Q9BW27  | NUP85        | 15       | 15       | 15       | 15.0    | Q9HBK9  | AS3MT        | 15       | 15       | 15       | 15.0    |
| Q5TA31  | RNF187       | 15       | 15       | 15       | 15.0    | P43487  | RANBP1       | 15       | 15       | 15       | 15.0    | O14757  | CHEK1        | 15       | 15       | 15       | 15.0    |
| Q13363  | CTBP1        | 15       | 15       | 15       | 15.0    | Q9BSH4  | TACO1        | 15       | 15       | 15       | 15.0    | Q96KC2  | ARL5B        | 15       | 15       | 15       | 15.0    |
| Q92552  | MRPS27       | 15       | 15       | 15       | 15.0    | P78371  | CCT2         | 15       | 15       | 15       | 15.0    | Q13107  | USP4         | 15       | 15       | 15       | 15.0    |
| Q9UL40  | ZNF346       | 15       | 15       | 15       | 15.0    | Q9UGP4  | LIMD1        | 15       | 15       | 15       | 15.0    | Q6UX53  | METTL7B      | 15       | 15       | 15       | 15.0    |
| Q9H3P2  | WHSC2        | 15       | 15       | 15       | 15.0    | Q9UFF9  | CNOT8        | 15       | 15       | 15       | 15.0    | P42574  | CASP3        | 15       | 15       | 15       | 15.0    |
| Q8N3F8  | MICALL1      | 15       | 15       | 15       | 15.0    | Q9BUB7  | TMEM70       | 15       | 15       | 15       | 15.0    | Q8IWI2  | GCC2         | 15       | 15       | 15       | 15.0    |
| Q9Y5K5  | UCHL5        | 15       | 15       | 15       | 15.0    | O13425  | SNTB2        | 15       | 15       | 15       | 15.0    | P53367  | ARFIP1       | 15       | 15       | 15       | 15.0    |
| Q9Y3Z3  | SAMHD1       | 15       | 15       | 15       | 15.0    | O94888  | UBXN7        | 15       | 15       | 15       | 15.0    | Q99541  | PLIN2        | 15       | 15       |          |         |

| uniprot | protein name | ratio#01 | ratio#02 | ratio#03 | average | uniprot | protein name | ratio#01 | ratio#02 | ratio#03 | average | uniprot | protein name | ratio#01 | ratio#02 | ratio#03 | average |
|---------|--------------|----------|----------|----------|---------|---------|--------------|----------|----------|----------|---------|---------|--------------|----------|----------|----------|---------|
| Q9NPD3  | EXOSC4       | 15       | 15       | 15       | 15.0    | Q96FJ2  | DYNLL2       | 15       | 15       | 15       | 15.0    | P54819  | AK2          | 15       | 15       | 15       | 15.0    |
| Q96RT8  | TUBGC5       | 15       | 15       | 15       | 15.0    | Q8TDN6  | BRIX1        | 15       | 15       | 15       | 15.0    | Q96S59  | RANBP9       | 15       | 15       | 15       | 15.0    |
| P08236  | GUSB         | 15       | 15       | 15       | 15.0    | Q9NRZ9  | HELLS        | 15       | 15       | 15       | 15.0    | P53007  | SLC25A1      | 15       | 15       | 15       | 15.0    |
| Q05BKZ1 | ZNF326       | 15       | 15       | 15       | 15.0    | Q9NXG2  | THUMPD1      | 15       | 15       | 15       | 15.0    | Q5MN26  | WDR45L       | 15       | 15       | 15       | 15.0    |
| Q9BUJ5  | TUBB6        | 15       | 15       | 15       | 15.0    | Q9Y2T2  | AP3M1        | 15       | 15       | 15       | 15.0    | P78356  | PIP4K2B      | 15       | 15       | 15       | 15.0    |
| P05141  | SLC25A5      | 15       | 15       | 15       | 15.0    | P41227  | NAA10        | 15       | 15       | 15       | 15.0    | P22061  | PCMT1        | 15       | 15       | 15       | 15.0    |
| Q15390  | MTFR1        | 15       | 15       | 15       | 15.0    | Q7Z3J2  | C16orf62     | 15       | 15       | 15       | 15.0    | Q8NBQ5  | HSD17B11     | 15       | 15       | 15       | 15.0    |
| Q12986  | NFX1         | 15       | 15       | 15       | 15.0    | Q9BZE1  | MRPL37       | 15       | 15       | 15       | 15.0    | Q96DT7  | ZBTB10       | 15       | 15       | 15       | 15.0    |
| P05412  | JUN          | 15       | 15       | 15       | 15.0    | P25398  | RPS12        | 15       | 15       | 15       | 15.0    | P04080  | CSTB         | 15       | 15       | 15       | 15.0    |
| Q9Y314  | NOSIP        | 15       | 15       | 15       | 15.0    | O00458  | IFRD1        | 15       | 15       | 15       | 15.0    | Q9NYL9  | TMOD3        | 15       | 15       | 15       | 15.0    |
| Q96BH1  | RNF25        | 15       | 15       | 15       | 15.0    | Q9UQ84  | EXO1         | 15       | 15       | 15       | 15.0    | Q9BY77  | POLDIP3      | 15       | 15       | 15       | 15.0    |
| Q8NFP7  | NUDT10       | 15       | 15       | 15       | 15.0    | Q9BX70  | TBBD2        | 15       | 15       | 15       | 15.0    | Q8IU60  | DCP2         | 15       | 15       | 15       | 15.0    |
| Q92551  | IP6K1        | 15       | 15       | 15       | 15.0    | O75503  | CLN5         | 15       | 15       | 15       | 15.0    | P26641  | EEF1G        | 15       | 15       | 15       | 15.0    |
| Q14181  | POLA2        | 15       | 15       | 15       | 15.0    | Q9H3R5  | CENPH        | 15       | 15       | 15       | 15.0    | P40938  | RFC3         | 15       | 15       | 15       | 15.0    |
| Q9NSK0  | KLC4         | 15       | 15       | 15       | 15.0    | Q96JB2  | COG3         | 15       | 15       | 15       | 15.0    | Q9NSY1  | BMP2K        | 15       | 15       | 15       | 15.0    |
| Q05TE4  | NTSDC1       | 15       | 15       | 15       | 15.0    | Q13439  | GOLGA4       | 15       | 15       | 15       | 15.0    | Q9Y263  | PLAA         | 15       | 15       | 15       | 15.0    |
| Q96CV9  | OPTN         | 15       | 15       | 15       | 15.0    | P14373  | TRIM27       | 15       | 15       | 15       | 15.0    | Q9NQ15  | EXOSC3       | 15       | 15       | 15       | 15.0    |
| Q9Y679  | AUP1         | 15       | 15       | 15       | 15.0    | Q9BRV8  | SIKE1        | 15       | 15       | 15       | 15.0    | Q13217  | DNAJC3       | 15       | 15       | 15       | 15.0    |
| Q06546  | GABPA        | 15       | 15       | 15       | 15.0    | Q8IXB1  | DNAJC10      | 15       | 15       | 15       | 15.0    | O14950  | MYL12B       | 15       | 15       | 15       | 15.0    |
| Q9UBB4  | ATXN10       | 15       | 15       | 15       | 15.0    | Q9NYH9  | UTP6         | 15       | 15       | 15       | 15.0    | Q7Z434  | MAVS         | 15       | 15       | 15       | 15.0    |
| P58004  | SESN2        | 15       | 15       | 15       | 15.0    | Q04726  | TLE3         | 15       | 15       | 15       | 15.0    | Q9BVV7  | TIMM21       | 15       | 15       | 15       | 15.0    |
| O75521  | ECI2         | 15       | 15       | 15       | 15.0    | Q95336  | PGLS         | 15       | 15       | 15       | 15.0    | Q9UKX7  | NUP50        | 15       | 15       | 15       | 15.0    |
| Q96SN8  | CDK5RAP2     | 15       | 15       | 15       | 15.0    | P82664  | MRPS10       | 15       | 15       | 15       | 15.0    | Q9NY65  | TUBA8        | 15       | 15       | 15       | 15.0    |
| A9UHW6  | MIF4GD       | 15       | 15       | 15       | 15.0    | Q9BXW7  | CECR5        | 15       | 15       | 15       | 15.0    | P55263  | ADK          | 15       | 15       | 15       | 15.0    |
| Q05932  | FPGS         | 15       | 15       | 15       | 15.0    | Q95604  | HLA-C        | 15       | 15       | 15       | 15.0    | P04792  | HSPB1        | 15       | 15       | 15       | 15.0    |
| P35250  | RFC2         | 15       | 15       | 15       | 15.0    | O15260  | SURF4        | 15       | 15       | 15       | 15.0    | O75330  | HMMR         | 15       | 15       | 15       | 15.0    |
| O15287  | FANCG        | 15       | 15       | 15       | 15.0    | P38117  | ETFB         | 15       | 15       | 15       | 15.0    | Q86XZ4  | SPATS2       | 15       | 15       | 15       | 15.0    |
| Q96GM5  | SMARCD1      | 15       | 15       | 15       | 15.0    | Q7L592  | C2orf56      | 15       | 15       | 15       | 15.0    | Q5W0B1  | RNF219       | 15       | 15       | 15       | 15.0    |
| P51570  | GALK1        | 15       | 15       | 15       | 15.0    | Q6ZRI6  | C15orf39     | 15       | 15       | 15       | 15.0    | P28482  | MAPK1        | 15       | 15       | 15       | 15.0    |
| Q9Y222  | MTO1         | 15       | 15       | 15       | 15.0    | Q16763  | UBE2S        | 15       | 15       | 15       | 15.0    | P60981  | DSTN         | 15       | 15       | 15       | 15.0    |
| P51617  | IRAK1        | 15       | 15       | 15       | 15.0    | Q8TC12  | RDH11        | 15       | 15       | 15       | 15.0    | O00471  | EXOC5        | 15       | 15       | 15       | 15.0    |
| O43865  | AHCYL1       | 15       | 15       | 15       | 15.0    | P23919  | ITYMK        | 15       | 15       | 15       | 15.0    | P50613  | CDK7         | 15       | 15       | 15       | 15.0    |
| Q02833  | RASSF7       | 15       | 15       | 15       | 15.0    | Q13505  | MTX1         | 15       | 15       | 15       | 15.0    | P12268  | IMPDH2       | 15       | 15       | 15       | 15.0    |
| O75940  | SMNDC1       | 15       | 15       | 15       | 15.0    | Q96EB1  | ELP4         | 15       | 15       | 15       | 15.0    | Q9BYD3  | MRPL4        | 15       | 15       | 15       | 15.0    |
| Q9Y6K9  | IKBKG        | 15       | 15       | 15       | 15.0    | Q96F86  | EDC3         | 15       | 15       | 15       | 15.0    | O75323  | GBAS         | 15       | 15       | 15       | 15.0    |
| P31930  | UQCRC1       | 15       | 15       | 15       | 15.0    | Q9H0W5  | CCDC8        | 15       | 15       | 15       | 15.0    | P60983  | GMFB         | 15       | 15       | 15       | 15.0    |
| Q9N245  | CISD1        | 15       | 15       | 15       | 15.0    | Q96HN2  | AHCYL2       | 15       | 15       | 15       | 15.0    | Q9UKJ3  | GPATC8       | 15       | 15       | 15       | 15.0    |
| Q05VZ5  | NAA35        | 15       | 15       | 15       | 15.0    | Q969Q0  | RPL36AL      | 15       | 15       | 15       | 15.0    | Q52LJ0  | FAM98B       | 15       | 15       | 15       | 15.0    |
| O15355  | PPM1G        | 15       | 15       | 15       | 15.0    | Q9UBX3  | SLC25A10     | 15       | 15       | 15       | 15.0    | P27635  | RPL10        | 15       | 15       | 15       | 15.0    |
| Q8WVX9  | FAR1         | 15       | 15       | 15       | 15.0    | Q96HE7  | ERO1L        | 15       | 15       | 15       | 15.0    | Q14232  | EIF2B1       | 15       | 15       | 15       | 15.0    |
| Q9ULC4  | MCTS1        | 15       | 15       | 15       | 15.0    | Q9NVG8  | TBC1D13      | 15       | 15       | 15       | 15.0    | Q9B0G2  | NUDT12       | 15       | 15       | 15       | 15.0    |
| Q9H0P0  | NT5C3        | 15       | 15       | 15       | 15.0    | Q95140  | MFN2         | 15       | 15       | 15       | 15.0    | Q9Y3C8  | UFC1         | 15       | 15       | 15       | 15.0    |
| Q8N0X7  | SPG20        | 15       | 15       | 15       | 15.0    | Q9BY32  | ITPA         | 15       | 15       | 15       | 15.0    | P54646  | PRKAA2       | 15       | 15       | 15       | 15.0    |
| Q86UJ8  | ISCA2        | 15       | 15       | 15       | 15.0    | Q9UBS8  | RNF14        | 15       | 15       | 15       | 15.0    | Q9NBP1  | ARFGAP3      | 15       | 15       | 15       | 15.0    |
| Q99567  | NUP88        | 15       | 15       | 15       | 15.0    | Q9H7D7  | WDR26        | 15       | 15       | 15       | 15.0    | Q14247  | CTTN         | 15       | 15       | 15       | 15.0    |
| Q9BRX2  | PELO         | 15       | 15       | 15       | 15.0    | P45984  | MAPK9        | 15       | 15       | 15       | 15.0    | Q9BPW8  | NIPSNAP1     | 15       | 15       | 15       | 15.0    |
| Q96EY8  | MMAB         | 15       | 15       | 15       | 15.0    | Q9ULV3  | CIZ1         | 15       | 15       | 15       | 15.0    | P68366  | TUBA4A       | 15       | 15       | 15       | 15.0    |
| Q9H7Z6  | KAT8         | 15       | 15       | 15       | 15.0    | O00233  | PSMD9        | 15       | 15       | 15       | 15.0    | Q9UKF6  | CP5F3        | 15       | 15       | 15       | 15.0    |
| O60921  | HUS1         | 15       | 15       | 15       | 15.0    | Q8N999  | C12orf29     | 15       | 15       | 15       | 15.0    | O96007  | MOC52        | 15       | 15       | 15       | 15.0    |
| Q8WVY7  | UBLCP1       | 15       | 15       | 15       | 15.0    | O14733  | MAP2K7       | 15       | 15       | 15       | 15.0    | Q96HS1  | PRGAM5       | 15       | 15       | 15       | 15.0    |
| Q9NR50  | EIF2B3       | 15       | 15       | 15       | 15.0    | Q00653  | NFKB2        | 15       | 15       | 15       | 15.0    | Q32M24  | LLRRFIP1     | 15       | 15       | 15       | 15.0    |
| P36405  | ARL3         | 15       | 15       | 15       | 15.0    | Q94763  | UR1          | 15       | 15       | 15       | 15.0    | Q8TEU7  | RAPGEF6      | 15       | 15       | 15       | 15.0    |
| Q05823  | RNASEL       | 15       | 15       | 15       | 15.0    | Q9GZ7R  | DDX24        | 15       | 15       | 15       | 15.0    | Q9NYZ3  | GTSE1        | 15       | 15       | 15       | 15.0    |
| Q00325  | SLC25A3      | 15       | 15       | 15       | 15.0    | Q13185  | CBX3         | 15       | 15       | 15       | 15.0    | Q9Y4E8  | USP15        | 15       | 15       | 15       | 15.0    |
| Q9H3K6  | BOLA2B       | 15       | 15       | 15       | 15.0    | Q96RQ1  | ERIG2        | 15       | 15       | 15       | 15.0    | Q96F63  | CCDC97       | 15       | 15       | 15       | 15.0    |
| Q92667  | AKAP1        | 15       | 15       | 15       | 15.0    | Q7Z4Q2  | HEATR3       | 15       | 15       | 15       | 15.0    | O00303  | EIF3F        | 15       | 15       | 15       | 15.0    |
| O15269  | SPTLC1       | 15       | 15       | 15       | 15.0    | Q13309  | SKP2         | 15       | 15       | 15       | 15.0    | O75223  | GGCT         | 15       | 15       | 15       | 15.0    |
| P32189  | GK           | 15       | 15       | 15       | 15.0    | Q95816  | BAG2         | 15       | 15       | 15       | 15.0    | Q8TEV9  | SMC8         | 15       | 15       | 15       | 15.0    |
| Q1ED39  | C16orf88     | 15       | 15       | 15       | 15.0    | Q9H0C8  | ILKAP        | 15       | 15       | 15       | 15.0    | Q9Y478  | PRKAB1       | 15       | 15       | 15       | 15.0    |
| Q86UL3  | AGPAT6       | 15       | 15       | 15       | 15.0    | P15531  | NME1         | 15       | 15       | 15       | 15.0    | Q96H79  | ZC3HAV1L     | 15       | 15       | 15       | 15.0    |
| C9J4G0  | C17orf49     | 15       | 15       | 15       | 15.0    | Q9Y3B9  | RRP15        | 15       | 15       | 15       | 15.0    | Q969K3  | RNF34        | 15       | 15       | 15       | 15.0    |
| Q9H6Y2  | WDR55        | 15       | 15       | 15       | 15.0    | P06753  | TPM3         | 15       | 15       | 15       | 15.0    | O75821  | EIF3G        | 15       | 15       | 15       | 15.0    |
| Q9BST9  | RTKN         | 15       | 15       | 15       | 15.0    | Q9P0K7  | RAI14        | 15       | 15       | 15       | 15.0    | Q00403  | GTF2B        | 15       | 15       | 15       | 15.0    |
| Q9H410  | DSN1         | 15       | 15       | 15       | 15.0    | P04818  | TYMS         | 15       | 15       | 15       | 15.0    | Q14192  | FHL2         | 15       | 15       | 15       | 15.0    |
| P63244  | GNB2L1       | 15       | 15       | 15       | 15.0    | Q12962  | TAF10        | 15       | 15       | 15       | 15.0    | Q02978  | SLC25A11     | 15       | 15       | 15       | 15.0    |
| Q8WVW9  | CKAP2        | 15       | 15       | 15       | 15.0    | P61106  | RAB14        | 15       | 15       | 15       | 15.0    | Q9BRG1  | VPS25        | 15       | 15       | 15       | 15.0    |
| Q9NRY5  | FAM114A2     | 15       | 15       | 15       | 15.0    | Q4G0N4  | NADKD1       | 15       | 15       | 15       | 15.0    | P07355  | ANXA2        | 15       | 15       | 15       | 15.0    |
| O14777  | NDC80        | 15       | 15       | 15       | 15.0    | Q53GS7  | GLE1         | 15       | 15       | 15       | 15.0    | O43324  | EEF1E1       | 15       | 15       | 15       | 15.0    |
| Q7Z6B0  | CCDC91       | 15       | 15       | 15       | 15.0    | Q9Y2S7  | POLDIP2      | 15       | 15       | 15       | 15.0    | P33981  | TTK          | 15       | 15       | 15       | 15.0    |
| P53609  | PGGT1B       | 15       | 15       | 15       | 15.0    | P62913  | RPL11        | 15       | 15       | 15       | 15.0    | Q9BQA1  | WDR77        | 15       | 15       | 15       | 15.0    |
| Q96555  | WRNIP1       | 15       | 15       | 15       | 15.0    | Q9NYY8  | FASTKD2      | 15       | 15       | 15       | 15.0    | O60941  | DTNB         | 15       | 15       | 15       | 15.0    |
| P82921  | MRPS21       | 15       | 15       | 15       | 15.0    | Q53H12  | AGK          | 15       | 15       | 15       | 15.0    | P62333  | PSMOC6       | 15       | 15       | 15       | 15.0    |
| Q9NY27  | PPP4R2       | 15       | 15       | 15       | 15.0    | Q8IWA0  | WDR75        | 15       | 15       | 15       | 15.0    | P21964  | COMT         | 15       | 15       | 15       | 15.0    |
| Q9HAV7  | GRPEL1       | 15       | 15       | 15       | 15.0    | Q43765  | SGTA         | 15       | 15       | 15       | 15.0    | P42575  | CASP2        | 15       | 15       | 15       | 15.0    |
| P68036  | UBE2L3       | 15       | 15       | 15       | 15.0    | Q12948  | FOXC1        | 15       | 15       | 15       | 15.0    | Q6NXR4  | TTI2         | 15       | 15       | 15       | 15.0    |
| Q01469  | FABP5        | 15       | 15       | 15       | 15.0    | Q71U36  | TUBA1A       | 15       | 15       | 15       | 15.0    | P16188  | HLA-A        | 15       | 15       | 15       | 15.0    |
| Q9UI12  | ATP6V1H      | 15       | 15       | 15       | 15.0    | Q94903  | PROSC        | 15       | 15       | 15       | 15.0    | Q9NVR0  | KLHL11       | 15       | 15       | 15       | 15.0    |
| Q8N2K0  | ABHD12       | 15       | 15       | 15       | 15.0    | P56589  | PREX3        | 15       | 15       | 15       | 15.0    | Q9BPY3  | FAM118B      | 15       | 15       | 15       | 15.0    |
| Q9BTE7  | DCUN1D5      | 15       | 15       | 15       | 15.0    | Q9Y5N6  | ORC6         | 15       | 15       | 15       | 15.0    | P57088  | TMEM33       | 15       | 15       | 15       | 15.0    |
| Q9UK99  | FBX03        | 15       | 15       | 15       | 15.0    | Q8N7H5  | PAF1         | 15       | 15       | 15       | 15.0    | Q9BY42  | C20orf43     | 15       | 15       | 15       | 15.0    |
| Q9GZV4  | EIF5A2       | 15       | 15       | 15       | 15.0    | Q99747  | NAPG         | 15       | 15       | 15       | 15.0    | O00193  | SMAP         | 1        |          |          |         |

| uniprot | protein name | ratio#01 | ratio#02 | ratio#03 | average | uniprot | protein name | ratio#01 | ratio#02 | ratio#03 | average | uniprot | protein name | ratio#01 | ratio#02 | ratio#03 | average |
|---------|--------------|----------|----------|----------|---------|---------|--------------|----------|----------|----------|---------|---------|--------------|----------|----------|----------|---------|
| Q95801  | TTC4         | 15       | 15       | 15       | 15.0    | Q96A72  | MAGOHB       | 15       | 15       | 15       | 15.0    | Q96PU8  | QKI          | 15       | 15       | 15       | 15.0    |
| Q9HC38  | GLOD4        | 15       | 15       | 15       | 15.0    | O14735  | CDIPT        | 15       | 15       | 15       | 15.0    | Q9NVU7  | SDAD1        | 15       | 15       | 15       | 15.0    |
| P63167  | DYNLL1       | 15       | 15       | 15       | 15.0    | Q99614  | TTC1         | 15       | 15       | 15       | 15.0    | Q13485  | SMAD4        | 15       | 15       | 15       | 15.0    |
| P36542  | ATP5C1       | 15       | 15       | 15       | 15.0    | Q04727  | TLE4         | 15       | 15       | 15       | 15.0    | Q9BVA0  | KATNB1       | 15       | 15       | 15       | 15.0    |
| P13804  | ETFA         | 15       | 15       | 15       | 15.0    | Q9H9V9  | JMJD4        | 15       | 15       | 15       | 15.0    | Q96TC7  | FAM82A2      | 15       | 15       | 15       | 15.0    |
| Q01415  | GALK2        | 15       | 15       | 15       | 15.0    | Q15910  | EZH2         | 15       | 15       | 15       | 15.0    | Q5JTD0  | TJAP1        | 15       | 15       | 15       | 15.0    |
| J3QL51  | PL17-C18ORF  | 15       | 15       | 15       | 15.0    | P19525  | EIF2AK2      | 15       | 15       | 15       | 15.0    | P18621  | RPL17        | 15       | 15       | 15       | 15.0    |
| Q9Y467  | SALL2        | 15       | 15       | 15       | 15.0    | Q9NWZ3  | IRAK4        | 15       | 15       | 15       | 15.0    | Q15723  | ELF2         | 15       | 15       | 15       | 15.0    |
| Q06830  | PRDX1        | 15       | 15       | 15       | 15.0    | Q9P287  | BCCIP        | 15       | 15       | 15       | 15.0    | P38432  | COIL         | 15       | 15       | 15       | 15.0    |
| O95551  | TDP2         | 15       | 15       | 15       | 15.0    | Q9H3F6  | KCTD10       | 15       | 15       | 15       | 15.0    | Q9P003  | CNIH4        | 15       | 15       | 15       | 15.0    |
| P52564  | MAP2K6       | 15       | 15       | 15       | 15.0    | P51692  | STAT5B       | 15       | 15       | 15       | 15.0    | Q96E22  | NUS1         | 15       | 15       | 15       | 15.0    |
| Q9BZX2  | UCK2         | 15       | 15       | 15       | 15.0    | Q3LXA3  | DAK          | 15       | 15       | 15       | 15.0    | Q92572  | AP3S1        | 15       | 15       | 15       | 15.0    |
| P15374  | UCHL3        | 15       | 15       | 15       | 15.0    | Q96GS4  | C17orf59     | 15       | 15       | 15       | 15.0    | Q8TC9   | HM13         | 15       | 15       | 15       | 15.0    |
| P14635  | CCNB1        | 15       | 15       | 15       | 15.0    | Q13322  | GRB10        | 15       | 15       | 15       | 15.0    | P47756  | CAPZB        | 15       | 15       | 15       | 15.0    |
| Q9Y5T5  | USP16        | 15       | 15       | 15       | 15.0    | Q9NYP9  | MYS18A       | 15       | 15       | 15       | 15.0    | P82912  | MRPS11       | 15       | 15       | 15       | 15.0    |
| Q9Y4H2  | IRS2         | 15       | 15       | 15       | 15.0    | Q96IZ6  | METT12A      | 15       | 15       | 15       | 15.0    | Q9UBF8  | PI4KB        | 15       | 15       | 15       | 15.0    |
| Q9NVX0  | HAUS2        | 15       | 15       | 15       | 15.0    | Q9GZM5  | YFPF3        | 15       | 15       | 15       | 15.0    | Q9BZL6  | PRKD2        | 15       | 15       | 15       | 15.0    |
| P56182  | RRP1         | 15       | 15       | 15       | 15.0    | O94927  | HAUS5        | 15       | 15       | 15       | 15.0    | P46734  | MAP2K3       | 15       | 15       | 15       | 15.0    |
| Q7L5N1  | COP56        | 15       | 15       | 15       | 15.0    | Q7L5D6  | GET4         | 15       | 15       | 15       | 15.0    | Q9BV44  | THUMP3       | 15       | 15       | 15       | 15.0    |
| Q9U049  | NEU3         | 15       | 15       | 15       | 15.0    | Q9Y6C9  | MTGH2        | 15       | 15       | 15       | 15.0    | Q9H7S9  | ZNF703       | 15       | 15       | 15       | 15.0    |
| P49411  | TUFM         | 15       | 15       | 15       | 15.0    | Q8N108  | MIER1        | 15       | 15       | 15       | 15.0    | P62829  | RPL23        | 15       | 15       | 15       | 15.0    |
| Q9Y220  | SUGT1        | 15       | 15       | 15       | 15.0    | Q6VN20  | RANBP10      | 15       | 15       | 15       | 15.0    | Q8N335  | GPD1L        | 15       | 15       | 15       | 15.0    |
| O15037  | KHNYN        | 15       | 15       | 15       | 15.0    | Q5SQN1  | SNAP47       | 15       | 15       | 15       | 15.0    | Q86W50  | METTL16      | 15       | 15       | 15       | 15.0    |
| Q8IY95  | TMEM192      | 15       | 15       | 15       | 15.0    | Q96JA3  | PLEKHA8      | 15       | 15       | 15       | 15.0    | Q9HB96  | FANCE        | 15       | 15       | 15       | 15.0    |
| Q8N8R3  | SLC25A29     | 15       | 15       | 15       | 15.0    | Q17RN3  | FAM98C       | 15       | 15       | 15       | 15.0    | P37235  | HPCAL1       | 15       | 15       | 15       | 15.0    |
| O95067  | CCNB2        | 15       | 15       | 15       | 15.0    | P46736  | BRC3         | 15       | 15       | 15       | 15.0    | O96671  | ASMTL        | 15       | 15       | 15       | 15.0    |
| P84098  | RPL19        | 15       | 15       | 15       | 15.0    | Q9UL46  | PSME2        | 15       | 15       | 15       | 15.0    | Q15717  | ELAVL1       | 15       | 15       | 15       | 15.0    |
| O43353  | RIPK2        | 15       | 15       | 15       | 15.0    | P13984  | GTF2F2       | 15       | 15       | 15       | 15.0    | O5J8M3  | EMC4         | 15       | 15       | 15       | 15.0    |
| Q53GQ0  | HSD17B12     | 15       | 15       | 15       | 15.0    | P49770  | EIF2B2       | 15       | 15       | 15       | 15.0    | Q6I049  | SDE2         | 15       | 15       | 15       | 15.0    |
| Q5JPH6  | EARS2        | 15       | 15       | 15       | 15.0    | P10319  | HLA-B        | 15       | 15       | 15       | 15.0    | Q6UXV4  | APOOL        | 15       | 15       | 15       | 15.0    |
| P18465  | HLA-B        | 15       | 15       | 15       | 15.0    | Q9N048  | LZTFL1       | 15       | 15       | 15       | 15.0    | Q8NEM2  | SHCBP1       | 15       | 15       | 15       | 15.0    |
| Q9BX56  | NUSAP1       | 15       | 15       | 15       | 15.0    | Q9Y5Y2  | NUBP2        | 15       | 15       | 15       | 15.0    | P67936  | TPM4         | 15       | 15       | 15       | 15.0    |
| Q04724  | TLE1         | 15       | 15       | 15       | 15.0    | P05534  | HLA-A        | 15       | 15       | 15       | 15.0    | Q9H7E9  | C8orf33      | 15       | 15       | 15       | 15.0    |
| O94782  | USP1         | 15       | 15       | 15       | 15.0    | Q96EY4  | TMA16        | 15       | 15       | 15       | 15.0    | Q9UH62  | ARMCX3       | 15       | 15       | 15       | 15.0    |
| Q8N680  | ZBTB2        | 15       | 15       | 15       | 15.0    | Q9H115  | NAPB         | 15       | 15       | 15       | 15.0    | Q12926  | ELAVL2       | 15       | 15       | 15       | 15.0    |
| Q8NB15  | ZNF511       | 15       | 15       | 15       | 15.0    | Q92665  | MRPS31       | 15       | 15       | 15       | 15.0    | Q96E09  | FAM122A      | 15       | 15       | 15       | 15.0    |
| Q5VVJ2  | MYSM1        | 15       | 15       | 15       | 15.0    | Q9Y2R9  | MRPS7        | 15       | 15       | 15       | 15.0    | Q6S2W1  | SARM1        | 15       | 15       | 15       | 15.0    |
| Q96B01  | RAD51AP1     | 15       | 15       | 15       | 15.0    | Q9GZT4  | SRR          | 15       | 15       | 15       | 15.0    | Q8WVC6  | DCAKD        | 15       | 15       | 15       | 15.0    |
| Q9NSP4  | CENPM        | 15       | 15       | 15       | 15.0    | Q9UHC7  | MKRN1        | 15       | 15       | 15       | 15.0    | Q9H0G5  | NSRP1        | 15       | 15       | 15       | 15.0    |
| Q9BWJ5  | SF3B5        | 15       | 15       | 15       | 15.0    | Q6ZN17  | LIN28B       | 15       | 15       | 15       | 15.0    | Q7Z6I8  | C5orf24      | 15       | 15       | 15       | 15.0    |
| Q5VT06  | CEP350       | 15       | 15       | 15       | 15.0    | Q8WVS4  | WDR60        | 15       | 15       | 15       | 15.0    | O95363  | FARS2        | 15       | 15       | 15       | 15.0    |
| Q9NZJ6  | COQ3         | 15       | 15       | 15       | 15.0    | Q8WUD4  | CCDC12       | 15       | 15       | 15       | 15.0    | Q9BRR3  | TMEM246      | 15       | 15       | 15       | 15.0    |
| Q9BVC5  | C2orf49      | 15       | 15       | 15       | 15.0    | Q96LT9  | RNPC3        | 15       | 15       | 15       | 15.0    | Q07157  | TJP1         | 15       | 15       | 15       | 15.0    |
| O60499  | STX10        | 15       | 15       | 15       | 15.0    | Q13586  | STIM1        | 15       | 15       | 15       | 15.0    | Q8N726  | CDKN2A       | 15       | 15       | 15       | 15.0    |
| Q9GZU8  | FAM192A      | 15       | 15       | 15       | 15.0    | P84090  | ERH          | 15       | 15       | 15       | 15.0    | Q96HR3  | MED30        | 15       | 15       | 15       | 15.0    |
| Q969X5  | ERGC1        | 15       | 15       | 15       | 15.0    | P48426  | PIP4K2A      | 15       | 15       | 15       | 15.0    | Q13630  | TSTA3        | 15       | 15       | 15       | 15.0    |
| Q8IXX5  | TMEM183A     | 15       | 15       | 15       | 15.0    | Q8IYN2  | TCEAL8       | 15       | 15       | 15       | 15.0    | O43521  | BCL2L11      | 15       | 15       | 15       | 15.0    |
| Q15906  | VPS2         | 15       | 15       | 15       | 15.0    | Q9NV92  | NDFIP2       | 15       | 15       | 15       | 15.0    | Q9BYG3  | MKI67P       | 15       | 15       | 15       | 15.0    |
| Q96LB3  | IFT74        | 15       | 15       | 15       | 15.0    | O60443  | DFNA5        | 15       | 15       | 15       | 15.0    | Q9H3L0  | MMADHC       | 15       | 15       | 15       | 15.0    |
| P0CB43  | FAM203B      | 15       | 15       | 15       | 15.0    | Q15054  | POLD3        | 15       | 15       | 15       | 15.0    | Q9BX63  | BRIP1        | 15       | 15       | 15       | 15.0    |
| Q9HOR4  | HDHD2        | 15       | 15       | 15       | 15.0    | Q15013  | MAD2L1BP     | 15       | 15       | 15       | 15.0    | Q9H9L7  | AKIRIN1      | 15       | 15       | 15       | 15.0    |
| Q92618  | ZNF516       | 15       | 15       | 15       | 15.0    | Q9BUR4  | WRAP53       | 15       | 15       | 15       | 15.0    | Q9UKZ1  | C2orf29      | 15       | 15       | 15       | 15.0    |
| Q00013  | MPP1         | 15       | 15       | 15       | 15.0    | O95139  | NDUFB6       | 15       | 15       | 15       | 15.0    | A1L390  | PLEKHG3      | 15       | 15       | 15       | 15.0    |
| Q8N2W9  | PIAS4        | 15       | 15       | 15       | 15.0    | P51452  | DUSP3        | 15       | 15       | 15       | 15.0    | P05549  | TFAP2A       | 15       | 15       | 15       | 15.0    |
| Q13615  | MTMR3        | 15       | 15       | 15       | 15.0    | Q8N806  | UBR7         | 15       | 15       | 15       | 15.0    | Q99767  | APBA2        | 15       | 15       | 15       | 15.0    |
| Q96G25  | MED8         | 15       | 15       | 15       | 15.0    | O6P597  | KLC3         | 15       | 15       | 15       | 15.0    | Q13371  | PDCL         | 15       | 15       | 15       | 15.0    |
| Q7L5Y9  | MAEA         | 15       | 15       | 15       | 15.0    | Q7L099  | RUFY3        | 15       | 15       | 15       | 15.0    | Q4G148  | GXYLT1       | 15       | 15       | 15       | 15.0    |
| Q14149  | MORC3        | 15       | 15       | 15       | 15.0    | O15388  | TOMM20       | 15       | 15       | 15       | 15.0    | Q9NXR1  | NDE1         | 15       | 15       | 15       | 15.0    |
| Q14534  | SOLE         | 15       | 15       | 15       | 15.0    | O60645  | EXOC3        | 15       | 15       | 15       | 15.0    | Q9UET6  | FTSJ1        | 15       | 15       | 15       | 15.0    |
| Q8N5W6  | FAM101B      | 15       | 15       | 15       | 15.0    | Q5SVS4  | SLC25A30     | 15       | 15       | 15       | 15.0    | O14965  | AURKA        | 15       | 15       | 15       | 15.0    |
| A0M266  | KIAA1598     | 15       | 15       | 15       | 15.0    | O6NSJ2  | PHLDB3       | 15       | 15       | 15       | 15.0    | O43292  | GPA1         | 15       | 15       | 15       | 15.0    |
| Q17RS7  | GEN1         | 15       | 15       | 15       | 15.0    | Q9H8G2  | CAAP1        | 15       | 15       | 15       | 15.0    | Q7L3B6  | CDC37L1      | 15       | 15       | 15       | 15.0    |
| Q8I269  | TRMT2A       | 15       | 15       | 15       | 15.0    | Q9Y619  | SLC25A15     | 15       | 15       | 15       | 15.0    | Q9Y3A2  | UTP11L       | 15       | 15       | 15       | 15.0    |
| Q96DW6  | SLC25A38     | 15       | 15       | 15       | 15.0    | Q6P178  | TMEM65       | 15       | 15       | 15       | 15.0    | Q99081  | TCF12        | 15       | 15       | 15       | 15.0    |
| Q8N136  | WDR36        | 15       | 15       | 15       | 15.0    | Q15051  | IGCB1        | 15       | 15       | 15       | 15.0    | Q9UJW8  | STK39        | 15       | 15       | 15       | 15.0    |
| Q9BV35  | SLC25A23     | 15       | 15       | 15       | 15.0    | Q13772  | NCOA4        | 15       | 15       | 15       | 15.0    | P45973  | CBX5         | 15       | 15       | 15       | 15.0    |
| P62837  | UBE2D2       | 15       | 15       | 15       | 15.0    | Q9H5V9  | Cxorf56      | 15       | 15       | 15       | 15.0    | P09382  | LGALS1       | 15       | 15       | 15       | 15.0    |
| P51553  | IDH3G        | 15       | 15       | 15       | 15.0    | O15555  | MAPRE2       | 15       | 15       | 15       | 15.0    | P35270  | SPR          | 15       | 15       | 15       | 15.0    |
| Q53H80  | AKIRIN2      | 15       | 15       | 15       | 15.0    | Q7L2J0  | MEPCE        | 15       | 15       | 15       | 15.0    | Q9Y3B4  | SF3B14       | 15       | 15       | 15       | 15.0    |
| Q9NP73  | ALG13        | 15       | 15       | 15       | 15.0    | Q9Y2X9  | ZNF281       | 15       | 15       | 15       | 15.0    | Q9NW81  | ATP5SL       | 15       | 15       | 15       | 15.0    |
| Q6IBS0  | TWF2         | 15       | 15       | 15       | 15.0    | O5BJF2  | TMEM97       | 15       | 15       | 15       | 15.0    | P23443  | RPS6KB1      | 15       | 15       | 15       | 15.0    |
| P51580  | TPMT         | 15       | 15       | 15       | 15.0    | Q12765  | SCRN1        | 15       | 15       | 15       | 15.0    | Q8NEY8  | PHLNL1       | 15       | 15       | 15       | 15.0    |
| O75391  | SPAG7        | 15       | 15       | 15       | 15.0    | O15392  | BIRC5        | 15       | 15       | 15       | 15.0    | Q8TBR7  | FAM57A       | 15       | 15       | 15       | 15.0    |
| Q9HC07  | TMEM165      | 15       | 15       | 15       | 15.0    | Q96RL1  | UIMC1        | 15       | 15       | 15       | 15.0    | Q6ZSJ8  | C1orf122     | 15       | 15       | 15       | 15.0    |
| Q00470  | MEIS1        | 15       | 15       | 15       | 15.0    | Q96GV9  | C5orf30      | 15       | 15       | 15       | 15.0    | O14770  | MEIS2        | 15       | 15       | 15       | 15.0    |
| Q9P0N9  | TBC1D7       | 15       | 15       | 15       | 15.0    | P62857  | RPS28        | 15       | 15       | 15       | 15.0    | Q9BUK6  | MSTO1        | 15       | 15       | 15       | 15.0    |
| Q9BVC4  | MLST8        | 15       | 15       | 15       | 15.0    | P40616  | ARL1         | 15       | 15       | 15       | 15.0    | Q96DU7  | ITPKC        | 15       | 15       | 15       | 15.0    |
| P28290  | SSFA2        | 15       | 15       | 15       | 15.0    | Q9Y243  | AKT3         | 15       | 15       | 15       | 15.0    | Q8NC60  | NOA1         | 15       | 15       | 15       | 15.0    |
| Q8IXQ3  | C9orf40      | 15       | 15       | 15       | 15.0    | Q9UF65  | C19orf25     | 15       | 15       | 15       | 15.0    | Q6ZJW1  | STXBP4       | 15       | 15       | 15       | 15.0    |
| Q6IAN0  | DHRS7B       | 15       | 15       | 15       | 15.0    | Q9BQ67  | GRWD1        | 15       | 15       | 15       | 15.0    | Q14657  | LAGE3        | 15       | 15       | 15       | 15.0    |
| Q53E24  | CEP55        | 15       | 15       | 15       | 15.0    | Q14680  | MELK         | 15       | 15       | 15       |         |         |              |          |          |          |         |

| uniprot | protein name | ratio#01 | ratio#02 | ratio#03 | average | uniprot | protein name | ratio#01 | ratio#02 | ratio#03 | average | uniprot | protein name   | ratio#01 | ratio#02 | ratio#03 | average |
|---------|--------------|----------|----------|----------|---------|---------|--------------|----------|----------|----------|---------|---------|----------------|----------|----------|----------|---------|
| Q9P000  | COMMD9       | 15       | 15       | 15       | 15.0    | P30085  | CMPK1        | 15       | 15       | 15       | 15.0    | Q96G04  | FAM86A         | 15       | 15       | 15       | 15.0    |
| Q8WYU0  | ATG4A        | 15       | 15       | 15       | 15.0    | Q9BV86  | NTMT1        | 15       | 15       | 15       | 15.0    | P26374  | CHML           | 15       | 15       | 15       | 15.0    |
| P29966  | MARCKS       | 15       | 15       | 15       | 15.0    | P40123  | CAP2         | 15       | 15       | 15       | 15.0    | Q96DY7  | MTBP           | 15       | 15       | 15       | 15.0    |
| Q96S19  | C16orf13     | 15       | 15       | 15       | 15.0    | Q15464  | SHB          | 15       | 15       | 15       | 15.0    | Q16718  | NDUFAS5        | 15       | 15       | 15       | 15.0    |
| Q5H9F3  | BCORL1       | 15       | 15       | 15       | 15.0    | Q9NZD2  | GLTP         | 15       | 15       | 15       | 15.0    | Q9NVR2  | INTS10         | 15       | 15       | 15       | 15.0    |
| Q92585  | MAML1        | 15       | 15       | 15       | 15.0    | Q6PQG7  | BORA         | 15       | 15       | 15       | 15.0    | Q9BQE4  | VIMP           | 15       | 15       | 15       | 15.0    |
| Q15173  | PPP2R5B      | 15       | 15       | 15       | 15.0    | Q8NA72  | POC5         | 15       | 15       | 15       | 15.0    | Q9NTX5  | ECHDC1         | 15       | 15       | 15       | 15.0    |
| Q6P6B7  | ANKRD16      | 15       | 15       | 15       | 15.0    | Q9UKS6  | PACSIN3      | 15       | 15       | 15       | 15.0    | Q9BRJ6  | C7orf50        | 15       | 15       | 15       | 15.0    |
| Q8IXS8  | FAM126B      | 15       | 15       | 15       | 15.0    | Q9NPA3  | MID1P1       | 15       | 15       | 15       | 15.0    | Q9NUP9  | LIN7C          | 15       | 15       | 15       | 15.0    |
| P41214  | EIF2D        | 15       | 15       | 15       | 15.0    | Q9NXU5  | ARL15        | 15       | 15       | 15       | 15.0    | Q96BN2  | TADA1          | 15       | 15       | 15       | 15.0    |
| Q9UKT4  | FBXO5        | 15       | 15       | 15       | 15.0    | Q9HD15  | SRA1         | 15       | 15       | 15       | 15.0    | Q6IPU0  | CENPP          | 15       | 15       | 15       | 15.0    |
| Q14118  | DAG1         | 15       | 15       | 15       | 15.0    | Q9Y2D8  | SSX2IP       | 15       | 15       | 15       | 15.0    | Q86XN7  | PROSER1        | 15       | 15       | 15       | 15.0    |
| Q96BY9  | TMEM66       | 15       | 15       | 15       | 15.0    | Q9NV35  | NUDT15       | 15       | 15       | 15       | 15.0    | Q96AQ8  | CCDC90A        | 15       | 15       | 15       | 15.0    |
| Q9NZZ3  | CHMP5        | 15       | 15       | 15       | 15.0    | Q7Z624  | CAMKMT       | 15       | 15       | 15       | 15.0    | Q96J6   | GMPPA          | 15       | 15       | 15       | 15.0    |
| Q9Y3A4  | RRP7A        | 15       | 15       | 15       | 15.0    | Q6P4I2  | WDR73        | 15       | 15       | 15       | 15.0    | Q8IY26  | PPAPDC2        | 15       | 15       | 15       | 15.0    |
| Q96C57  | C12orf43     | 15       | 15       | 15       | 15.0    | E7EVK2  | MTG1         | 15       | 15       | 15       | 15.0    | P98172  | EFNB1          | 15       | 15       | 15       | 15.0    |
| E9PI62  | MTG1         | 15       | 15       | 15       | 15.0    | P51157  | RAB28        | 15       | 15       | 15       | 15.0    | P17482  | HOXB9          | 15       | 15       | 15       | 15.0    |
| Q96RT1  | ERBB2IP      | 15       | 15       | 15       | 15.0    | Q9UBV8  | PEF1         | 15       | 15       | 15       | 15.0    | Q14CZ7  | FASTKD3        | 15       | 15       | 15       | 15.0    |
| P16220  | CREB1        | 15       | 15       | 15       | 15.0    | P62330  | ARF6         | 15       | 15       | 15       | 15.0    | Q9P0V9  | 10-Sep         | 15       | 15       | 15       | 15.0    |
| Q8NEB9  | PIK3C3       | 15       | 15       | 15       | 15.0    | Q9Y5X2  | SNX8         | 15       | 15       | 15       | 15.0    | Q92624  | APBP2          | 15       | 15       | 15       | 15.0    |
| Q43617  | TRAPP3       | 15       | 15       | 15       | 15.0    | Q9UDY8  | MALT1        | 15       | 15       | 15       | 15.0    | Q5HYK7  | SH3D19         | 15       | 15       | 15       | 15.0    |
| Q9BVS4  | RIOK2        | 15       | 15       | 15       | 15.0    | Q7Z6J9  | TSEN54       | 15       | 15       | 15       | 15.0    | Q9UL33  | TRAPP2L        | 15       | 15       | 15       | 15.0    |
| Q9GZN1  | ACTR6        | 15       | 15       | 15       | 15.0    | Q643R3  | LPCAT4       | 15       | 15       | 15       | 15.0    | Q9H944  | MED20          | 15       | 15       | 15       | 15.0    |
| Q94992  | HEXIM1       | 15       | 15       | 15       | 15.0    | P49427  | CDC34        | 15       | 15       | 15       | 15.0    | O00268  | TAFA           | 15       | 15       | 15       | 15.0    |
| P63279  | UBE2I        | 15       | 15       | 15       | 15.0    | P27544  | CERS1        | 15       | 15       | 15       | 15.0    | Q3ZCQ8  | TIMM50         | 15       | 15       | 15       | 15.0    |
| Q9H4A5  | GOLPH3L      | 15       | 15       | 15       | 15.0    | Q15645  | TRIP13       | 15       | 15       | 15       | 15.0    | Q15545  | TAFA7          | 15       | 15       | 15       | 15.0    |
| O00154  | ACOT7        | 15       | 15       | 15       | 15.0    | Q7Z5J4  | RAI1         | 15       | 15       | 15       | 15.0    | Q5T280  | C9orf114       | 15       | 15       | 15       | 15.0    |
| Q8NSD0  | WDC1C        | 15       | 15       | 15       | 15.0    | Q9UBQ7  | GRHRP        | 15       | 15       | 15       | 15.0    | Q8TDX7  | NEK7           | 15       | 15       | 15       | 15.0    |
| Q9HCE5  | METTL14      | 15       | 15       | 15       | 15.0    | Q9Y3C7  | MED31        | 15       | 15       | 15       | 15.0    | Q6NVV7  | CDPF1          | 15       | 15       | 15       | 15.0    |
| Q96CU9  | FOXRED1      | 15       | 15       | 15       | 15.0    | Q9NWZ8  | GEMIN8       | 15       | 15       | 15       | 15.0    | Q8N9N5  | BANP           | 15       | 15       | 15       | 15.0    |
| Q96AD5  | PNPLA2       | 15       | 15       | 15       | 15.0    | Q567V2  | MPV17L2      | 15       | 15       | 15       | 15.0    | P61081  | UBE2M          | 15       | 15       | 15       | 15.0    |
| Q9NQE9  | HINT3        | 15       | 15       | 15       | 15.0    | Q8N357  | C2orf18      | 15       | 15       | 15       | 15.0    | Q8IXU6  | SLC35F2        | 15       | 15       | 15       | 15.0    |
| Q9BQT8  | SLC25A21     | 15       | 15       | 15       | 15.0    | Q9NQX7  | ITM2C        | 15       | 15       | 15       | 15.0    | Q8N9M1  | C19orf47       | 15       | 15       | 15       | 15.0    |
| P50897  | PPT1         | 15       | 15       | 15       | 15.0    | O14730  | RIOK3        | 15       | 15       | 15       | 15.0    | Q9NZJ9  | NUDT4          | 15       | 15       | 15       | 15.0    |
| Q68CZ6  | HAUS3        | 15       | 15       | 15       | 15.0    | Q8NSN7  | MRPL50       | 15       | 15       | 15       | 15.0    | P09497  | CLTB           | 15       | 15       | 15       | 15.0    |
| Q9P032  | NDUF4F4      | 15       | 15       | 15       | 15.0    | A2A3K4  | PTPDC1       | 15       | 15       | 15       | 15.0    | Q9BW91  | NUDT9          | 15       | 15       | 15       | 15.0    |
| A6NED2  | RCCD1        | 15       | 15       | 15       | 15.0    | O00124  | UBXN8        | 15       | 15       | 15       | 15.0    | H3BMM0  | Incharacterize | 15       | 15       | 15       | 15.0    |
| O00287  | RFXAP        | 15       | 15       | 15       | 15.0    | O14519  | CDK2AP1      | 15       | 15       | 15       | 15.0    | O00400  | SLC33A1        | 15       | 15       | 15       | 15.0    |
| O14521  | SDHD         | 15       | 15       | 15       | 15.0    | O14775  | GNB5         | 15       | 15       | 15       | 15.0    | O14562  | UBFD1          | 15       | 15       | 15       | 15.0    |
| O14874  | BCKDK        | 15       | 15       | 15       | 15.0    | O14893  | GEMIN2       | 15       | 15       | 15       | 15.0    | O14880  | MGST3          | 15       | 15       | 15       | 15.0    |
| O14966  | RAB7L1       | 15       | 15       | 15       | 15.0    | O15160  | POLR1C       | 15       | 15       | 15       | 15.0    | O15155  | BET1           | 15       | 15       | 15       | 15.0    |
| O15265  | ATXN7        | 15       | 15       | 15       | 15.0    | O15446  | CD3EAP       | 15       | 15       | 15       | 15.0    | O15304  | SIVA1          | 15       | 15       | 15       | 15.0    |
| O43402  | EMC8         | 15       | 15       | 15       | 15.0    | O43639  | NCK2         | 15       | 15       | 15       | 15.0    | O43504  | HXBIP          | 15       | 15       | 15       | 15.0    |
| O43808  | SLC25A17     | 15       | 15       | 15       | 15.0    | O75128  | COBL         | 15       | 15       | 15       | 15.0    | O60739  | EIF1B          | 15       | 15       | 15       | 15.0    |
| O75381  | PEX14        | 15       | 15       | 15       | 15.0    | O75607  | NPM3         | 15       | 15       | 15       | 15.0    | O75586  | MED6           | 15       | 15       | 15       | 15.0    |
| O75911  | DHR33        | 15       | 15       | 15       | 15.0    | O76075  | DFFB         | 15       | 15       | 15       | 15.0    | O75935  | DCTN3          | 15       | 15       | 15       | 15.0    |
| O94768  | STK17B       | 15       | 15       | 15       | 15.0    | O95258  | SLC25A14     | 15       | 15       | 15       | 15.0    | O94941  | UBOX5          | 15       | 15       | 15       | 15.0    |
| O95295  | SNAPIN       | 15       | 15       | 15       | 15.0    | O95674  | CDS2         | 15       | 15       | 15       | 15.0    | O95544  | NADK           | 15       | 15       | 15       | 15.0    |
| O95685  | PPP1R3D      | 15       | 15       | 15       | 15.0    | O95825  | CRYZL1       | 15       | 15       | 15       | 15.0    | O95749  | GGPS1          | 15       | 15       | 15       | 15.0    |
| O95999  | BCL10        | 15       | 15       | 15       | 15.0    | P07919  | UQCRRH       | 15       | 15       | 15       | 15.0    | P04424  | ASL            | 15       | 15       | 15       | 15.0    |
| P07992  | ERCC1        | 15       | 15       | 15       | 15.0    | P10636  | MAPT         | 15       | 15       | 15       | 15.0    | P09234  | SNRPC          | 15       | 15       | 15       | 15.0    |
| P13591  | NCAM1        | 15       | 15       | 15       | 15.0    | P15260  | IFNGR1       | 15       | 15       | 15       | 15.0    | P14649  | MYL6B          | 15       | 15       | 15       | 15.0    |
| P17152  | TMEM11       | 15       | 15       | 15       | 15.0    | P17509  | HOXB6        | 15       | 15       | 15       | 15.0    | P17481  | HOXB8          | 15       | 15       | 15       | 15.0    |
| P20719  | HOXA5        | 15       | 15       | 15       | 15.0    | P32519  | ELF1         | 15       | 15       | 15       | 15.0    | P31274  | HOXC9          | 15       | 15       | 15       | 15.0    |
| P36954  | POLR2I       | 15       | 15       | 15       | 15.0    | P41567  | EIF1         | 15       | 15       | 15       | 15.0    | P41162  | ETV3           | 15       | 15       | 15       | 15.0    |
| P42679  | MATK         | 15       | 15       | 15       | 15.0    | P49069  | CAMLG        | 15       | 15       | 15       | 15.0    | P49006  | MARCKSL1       | 15       | 15       | 15       | 15.0    |
| P49459  | UBE2A        | 15       | 15       | 15       | 15.0    | P52630  | STAT2        | 15       | 15       | 15       | 15.0    | P50749  | RASSF2         | 15       | 15       | 15       | 15.0    |
| P52657  | GTF2A2       | 15       | 15       | 15       | 15.0    | P53634  | CTSC         | 15       | 15       | 15       | 15.0    | P52739  | ZNF131         | 15       | 15       | 15       | 15.0    |
| P53677  | AP3M2        | 15       | 15       | 15       | 15.0    | P55085  | F2RL1        | 15       | 15       | 15       | 15.0    | P54274  | TERF1          | 15       | 15       | 15       | 15.0    |
| P55789  | GFER         | 15       | 15       | 15       | 15.0    | P56559  | ARL4C        | 15       | 15       | 15       | 15.0    | P56524  | HDAC4          | 15       | 15       | 15       | 15.0    |
| P58005  | SESN3        | 15       | 15       | 15       | 15.0    | P61758  | VBP1         | 15       | 15       | 15       | 15.0    | P60903  | S100A10        | 15       | 15       | 15       | 15.0    |
| P61968  | LMO4         | 15       | 15       | 15       | 15.0    | P63173  | RPL38        | 15       | 15       | 15       | 15.0    | P62158  | CALM3          | 15       | 15       | 15       | 15.0    |
| Q01664  | TFAP4        | 15       | 15       | 15       | 15.0    | Q06136  | KDSR         | 15       | 15       | 15       | 15.0    | Q03113  | GNA12          | 15       | 15       | 15       | 15.0    |
| Q07617  | SPAG1        | 15       | 15       | 15       | 15.0    | Q0P9N6  | ARL16        | 15       | 15       | 15       | 15.0    | Q0IIM8  | TBC1D8B        | 15       | 15       | 15       | 15.0    |
| Q12968  | NFATC3       | 15       | 15       | 15       | 15.0    | Q13637  | RAB32        | 15       | 15       | 15       | 15.0    | Q13480  | GAB1           | 15       | 15       | 15       | 15.0    |
| Q13795  | ARFRP1       | 15       | 15       | 15       | 15.0    | Q14592  | ZNF460       | 15       | 15       | 15       | 15.0    | Q14135  | VGLL4          | 15       | 15       | 15       | 15.0    |
| Q14699  | RFTN1        | 15       | 15       | 15       | 15.0    | Q15004  | KIAA0101     | 15       | 15       | 15       | 15.0    | Q14865  | ARID5B         | 15       | 15       | 15       | 15.0    |
| Q15125  | EBP          | 15       | 15       | 15       | 15.0    | Q15532  | SS18         | 15       | 15       | 15       | 15.0    | Q15475  | SIX1           | 15       | 15       | 15       | 15.0    |
| Q15649  | ZNHIT3       | 15       | 15       | 15       | 15.0    | Q15773  | MLF2         | 15       | 15       | 15       | 15.0    | Q15652  | JMJD1C         | 15       | 15       | 15       | 15.0    |
| Q16890  | TPD52L1      | 15       | 15       | 15       | 15.0    | Q2TAM9  | TUSC1        | 15       | 15       | 15       | 15.0    | Q2KHR2  | RFX7           | 15       | 15       | 15       | 15.0    |
| Q4G0A6  | FAM188B      | 15       | 15       | 15       | 15.0    | Q4VC31  | CCDC58       | 15       | 15       | 15       | 15.0    | Q4U2R6  | MRPL51         | 15       | 15       | 15       | 15.0    |
| Q53H47  | SETMAR       | 15       | 15       | 15       | 15.0    | Q53HL2  | CDC48        | 15       | 15       | 15       | 15.0    | Q53HC5  | KLHL26         | 15       | 15       | 15       | 15.0    |
| Q5EBL4  | RILPL1       | 15       | 15       | 15       | 15.0    | Q5J554  | PSMG4        | 15       | 15       | 15       | 15.0    | Q5FBB7  | SGOL1          | 15       | 15       | 15       | 15.0    |
| Q5QJ74  | TBCEL        | 15       | 15       | 15       | 15.0    | Q5T9S5  | CCDC18       | 15       | 15       | 15       | 15.0    | Q5R115  | COX20          | 15       | 15       | 15       | 15.0    |
| Q5TA50  | GLTPD1       | 15       | 15       | 15       | 15.0    | Q5VTL8  | PRPF3B       | 15       | 15       | 15       | 15.0    | Q5U5X0  | LYRM7          | 15       | 15       | 15       | 15.0    |
| Q5VUG0  | SFMBT2       | 15       | 15       | 15       | 15.0    | Q5XKP0  | QIL1         | 15       | 15       | 15       | 15.0    | Q5W111  | SPRYD7         | 15       | 15       | 15       | 15.0    |
| Q69YU5  | C12orf73     | 15       | 15       | 15       | 15.0    | Q6IEG0  | SNRNP48      | 15       | 15       | 15       | 15.0    | Q6IBW4  | NCAPH2         | 15       | 15       | 15       | 15.0    |
| Q6P1L8  | MRPL14       | 15       | 15       | 15       | 15.0    | Q6PD74  | AAGAB        | 15       | 15       | 15       | 15.0    | Q6P1X6  | C8orf82        | 15       | 15       | 15       | 15.0    |
| Q6PH81  | C16orf87     | 15       | 15       | 15       | 15.0    | Q6Y1H2  | PTPLB        | 15       | 15       | 15       | 15.0    | Q6PHR2  | ULK3           | 15       | 15       | 15       | 15.0    |
| Q712K3  | UBE2R2       | 15       | 15       | 15       | 15.0    | Q7Z4G1  | COMMD6       | 15       | 15       | 15       | 15.0    | Q7Z309  | FAM122B        | 15       | 15       | 15       | 15.0    |
| Q7Z5L2  | R3HCC1L      | 15       | 15       | 15       | 15.0    | Q7Z7A4  | PXK          | 15       | 15       | 15       | 15.0    | Q7Z6V5  | ADAT2          |          |          |          |         |

| uniprot | protein name | ratio#01 | ratio#02 | ratio#03 | average | uniprot | protein name | ratio#01 | ratio#02 | ratio#03 | average | uniprot | protein name | ratio#01 | ratio#02 | ratio#03 | average |
|---------|--------------|----------|----------|----------|---------|---------|--------------|----------|----------|----------|---------|---------|--------------|----------|----------|----------|---------|
| Q96HJ9  | C7orf55      | 15       | 15       | 15       | 15.0    | Q96IZ5  | RBM41        | 15       | 15       | 15       | 15.0    | Q96IW7  | SEC22A       | 15       | 15       | 15       | 15.0    |
| Q96JK2  | DCAF5        | 15       | 15       | 15       | 15.0    | Q96K31  | C8orf76      | 15       | 15       | 15       | 15.0    | Q96JN0  | LCOR         | 15       | 15       | 15       | 15.0    |
| Q96K58  | ZNF668       | 15       | 15       | 15       | 15.0    | Q96L50  | LRR1         | 15       | 15       | 15       | 15.0    | Q96L15  | ART5         | 15       | 15       | 15       | 15.0    |
| Q96M96  | FGD4         | 15       | 15       | 15       | 15.0    | Q96NT0  | CCDC115      | 15       | 15       | 15       | 15.0    | Q96MX6  | WDR92        | 15       | 15       | 15       | 15.0    |
| Q96S90  | SCAF11       | 15       | 15       | 15       | 15.0    | Q96807  | COQ7         | 15       | 15       | 15       | 15.0    | Q96952  | ZNF238       | 15       | 15       | 15       | 15.0    |
| Q96QI3  | EIF2AK1      | 15       | 15       | 15       | 15.0    | Q96B3C4 | NOL10        | 15       | 15       | 15       | 15.0    | Q96BRF8 | CPPED1       | 15       | 15       | 15       | 15.0    |
| Q96SF4  | C19orf52     | 15       | 15       | 15       | 15.0    | Q9BT25  | HAUS8        | 15       | 15       | 15       | 15.0    | Q9BSI4  | TINF2        | 15       | 15       | 15       | 15.0    |
| Q9BT73  | PSMG3        | 15       | 15       | 15       | 15.0    | Q9BUR5  | APOO         | 15       | 15       | 15       | 15.0    | Q9BTX3  | TMEM208      | 15       | 15       | 15       | 15.0    |
| Q9BUT9  | FAM195A      | 15       | 15       | 15       | 15.0    | Q9BW83  | IFT27        | 15       | 15       | 15       | 15.0    | Q9BV19  | C1orf50      | 15       | 15       | 15       | 15.0    |
| Q9BWG6  | SCNM1        | 15       | 15       | 15       | 15.0    | Q9GZP9  | DERL2        | 15       | 15       | 15       | 15.0    | Q9BY49  | PECR         | 15       | 15       | 15       | 15.0    |
| Q9GZR1  | SENP6        | 15       | 15       | 15       | 15.0    | Q9HOA8  | COMMD4       | 15       | 15       | 15       | 15.0    | Q9H079  | C15orf29     | 15       | 15       | 15       | 15.0    |
| Q9H116  | GZF1         | 15       | 15       | 15       | 15.0    | Q9H2J4  | PDCL3        | 15       | 15       | 15       | 15.0    | Q9H204  | MED28        | 15       | 15       | 15       | 15.0    |
| Q9H2Y7  | ZFP106       | 15       | 15       | 15       | 15.0    | Q9H4B6  | SAV1         | 15       | 15       | 15       | 15.0    | Q9H4A6  | GOLPH3       | 15       | 15       | 15       | 15.0    |
| Q9H5X1  | FAM96A       | 15       | 15       | 15       | 15.0    | Q9H7H0  | METTL17      | 15       | 15       | 15       | 15.0    | Q9H694  | BICC1        | 15       | 15       | 15       | 15.0    |
| Q9H8H3  | METTL7A      | 15       | 15       | 15       | 15.0    | Q9H9Q4  | NHEJ1        | 15       | 15       | 15       | 15.0    | Q9H8Y5  | ANKZF1       | 15       | 15       | 15       | 15.0    |
| Q9HB66  | IFT122       | 15       | 15       | 15       | 15.0    | Q9HD42  | CHMP1A       | 15       | 15       | 15       | 15.0    | Q9HCK1  | ZDBF2        | 15       | 15       | 15       | 15.0    |
| Q9NP50  | FAM60A       | 15       | 15       | 15       | 15.0    | Q9NP11  | BRD7         | 15       | 15       | 15       | 15.0    | Q9NP80  | PNPLA8       | 15       | 15       | 15       | 15.0    |
| Q9NPJ6  | MED4         | 15       | 15       | 15       | 15.0    | Q9NQ14  | EXOSC5       | 15       | 15       | 15       | 15.0    | Q9NQ92  | COPR5        | 15       | 15       | 15       | 15.0    |
| Q9NR33  | POLE4        | 15       | 15       | 15       | 15.0    | Q9NRP4  | ACN9         | 15       | 15       | 15       | 15.0    | Q9NRF9  | POLE3        | 15       | 15       | 15       | 15.0    |
| Q9NRZ7  | AGPAT3       | 15       | 15       | 15       | 15.0    | Q9NSB8  | HOMER2       | 15       | 15       | 15       | 15.0    | Q9NS73  | MBIP         | 15       | 15       | 15       | 15.0    |
| Q9NU19  | TBC1D22B     | 15       | 15       | 15       | 15.0    | Q9NUX5  | POT1         | 15       | 15       | 15       | 15.0    | Q9NUG6  | PDRG1        | 15       | 15       | 15       | 15.0    |
| Q9NV79  | PCMTD2       | 15       | 15       | 15       | 15.0    | Q9NWH2  | TMEM242      | 15       | 15       | 15       | 15.0    | Q9NV88  | INTS9        | 15       | 15       | 15       | 15.0    |
| Q9NWQ4  | C14orf118    | 15       | 15       | 15       | 15.0    | Q9NX18  | SDHAF2       | 15       | 15       | 15       | 15.0    | Q9NX00  | TMEM160      | 15       | 15       | 15       | 15.0    |
| Q9NXK8  | FBXL12       | 15       | 15       | 15       | 15.0    | Q9NZ08  | ERAP1        | 15       | 15       | 15       | 15.0    | Q9NY12  | GAR1         | 15       | 15       | 15       | 15.0    |
| Q9NZJ7  | MTCH1        | 15       | 15       | 15       | 15.0    | Q9POV3  | SH3BP4       | 15       | 15       | 15       | 15.0    | Q9P086  | MED11        | 15       | 15       | 15       | 15.0    |
| Q9P1Q0  | VPS54        | 15       | 15       | 15       | 15.0    | Q9UBI1  | COMMD3       | 15       | 15       | 15       | 15.0    | Q9UBB5  | MBD2         | 15       | 15       | 15       | 15.0    |
| Q9UC56  | PISD         | 15       | 15       | 15       | 15.0    | Q9UHY8  | FEZ2         | 15       | 15       | 15       | 15.0    | Q9UH92  | MLX          | 15       | 15       | 15       | 15.0    |
| Q9UJA3  | MCM8         | 15       | 15       | 15       | 15.0    | Q9ULP0  | NDRG4        | 15       | 15       | 15       | 15.0    | Q9UKT7  | FBXL3        | 15       | 15       | 15       | 15.0    |
| Q9UNK9  | ANGEL1       | 15       | 15       | 15       | 15.0    | Q9Y2Q5  | LAMTOR2      | 15       | 15       | 15       | 15.0    | Q9Y244  | POMP         | 15       | 15       | 15       | 15.0    |
| Q9Y2U5  | MAP3K2       | 15       | 15       | 15       | 15.0    | Q9Y333  | LSM2         | 15       | 15       | 15       | 15.0    | Q9Y2V2  | CARHSP1      | 15       | 15       | 15       | 15.0    |
| Q9Y3D2  | MSRB2        | 15       | 15       | 15       | 15.0    | Q9Y4K4  | MAP4K5       | 15       | 15       | 15       | 15.0    | Q9Y3V2  | RWDD3        | 15       | 15       | 15       | 15.0    |
| Q9Y6G3  | MRPL42       | 15       | 15       | 15       | 15.0    | P13639  | EEF2         | 14.98    | 15       | 15       | 15.0    | Q9Y6X9  | MORC2        | 15       | 15       | 15       | 15.0    |
| P21266  | GSTM3        | 14.96    | 15       | 15       | 15.0    | Q9BVP2  | GNL3         | 14.93    | 15       | 15       | 15.0    | Q5VWN6  | FAM208B      | 14.93    | 15       | 15       | 15.0    |
| P46976  | GYG1         | 14.93    | 15       | 15       | 15.0    | Q6NWX34 | C3orf17      | 14.89    | 15       | 15       | 15.0    | Q6NUM9  | RETSAT       | 14.9     | 15       | 15       | 15.0    |
| Q9Y6E0  | STK24        | 14.89    | 15       | 15       | 15.0    | Q96JG6  | CCDC132      | 14.88    | 15       | 15       | 15.0    | Q9NZJ0  | DTL          | 14.89    | 15       | 15       | 15.0    |
| Q8IUX1  | TMEM126B     | 14.88    | 15       | 15       | 15.0    | Q9NS56  | TOPORS       | 14.84    | 15       | 15       | 14.9    | Q5SW96  | LDLRAP1      | 14.86    | 15       | 15       | 15.0    |
| P48506  | GCLC         | 14.82    | 15       | 15       | 14.9    | Q9ULJ3  | ZNF295       | 14.79    | 15       | 15       | 14.9    | Q8NB90  | SPATA5       | 14.8     | 15       | 15       | 14.9    |
| Q9BTA9  | WAC          | 14.78    | 15       | 15       | 14.9    | P04843  | RPN1         | 14.77    | 15       | 15       | 14.9    | O15120  | AGPAT2       | 14.78    | 15       | 15       | 14.9    |
| Q9NR09  | BIRC6        | 14.75    | 15       | 15       | 14.9    | P18031  | PTPN1        | 14.66    | 15       | 15       | 14.9    | Q9BXF6  | RAB11FIP5    | 14.7     | 15       | 15       | 14.9    |
| Q14C86  | GAPVD1       | 14.65    | 15       | 15       | 14.9    | Q9UN37  | VPS4A        | 14.6     | 15       | 15       | 14.9    | Q9NVH2  | INTS7        | 14.62    | 15       | 15       | 14.9    |
| Q9P2N5  | RBM27        | 14.58    | 15       | 15       | 14.9    | O15345  | LRRC41       | 14.57    | 15       | 15       | 14.9    | Q7L523  | RRAGA        | 14.58    | 15       | 15       | 14.9    |
| P62993  | GRB2         | 14.53    | 15       | 15       | 14.8    | P23458  | JAK1         | 14.5     | 15       | 15       | 14.8    | Q9H813  | TMEM206      | 14.53    | 15       | 15       | 14.8    |
| Q9BWV61 | DDA1         | 14.49    | 15       | 15       | 14.8    | P13084  | MRPL28       | 14.45    | 15       | 15       | 14.8    | Q8N6S5  | ARL6IP6      | 14.48    | 15       | 15       | 14.8    |
| Q9UJX6  | ANAPC2       | 14.44    | 15       | 15       | 14.8    | O43502  | RAD51C       | 14.42    | 15       | 15       | 14.8    | O14672  | ADAM10       | 14.42    | 15       | 15       | 14.8    |
| Q15048  | LRRC14       | 14.42    | 15       | 15       | 14.8    | O15111  | CHUK         | 14.38    | 15       | 15       | 14.8    | Q5SVZ6  | ZMYM1        | 14.38    | 15       | 15       | 14.8    |
| Q9HB21  | PLEKHA1      | 14.37    | 15       | 15       | 14.8    | Q9P2D0  | IBTK         | 14.37    | 15       | 15       | 14.8    | Q9NWX5  | BABAM1       | 14.37    | 15       | 15       | 14.8    |
| P01112  | HRAS         | 14.32    | 15       | 15       | 14.8    | P30154  | PPP2R1B      | 14.29    | 15       | 15       | 14.8    | Q96EK6  | GMPNAT1      | 14.31    | 15       | 15       | 14.8    |
| Q9Y2X0  | MED16        | 14.25    | 15       | 15       | 14.8    | Q6P2H3  | CEP85        | 14.21    | 15       | 15       | 14.7    | Q8ND76  | CCNY         | 14.22    | 15       | 15       | 14.7    |
| P57722  | EEFSEC       | 14.2     | 15       | 15       | 14.7    | P52732  | KIF11        | 14.18    | 15       | 15       | 14.7    | Q96KP1  | EXOC2        | 14.2     | 15       | 15       | 14.7    |
| Q9Y6Y0  | IVNS1ABP     | 14.16    | 15       | 15       | 14.7    | Q8NHV4  | NEDD1        | 14.14    | 15       | 15       | 14.7    | Q92599  | 8-Sep        | 14.16    | 15       | 15       | 14.7    |
| Q9HBV3  | ECT2         | 14.1     | 15       | 15       | 14.7    | P47755  | CAPZA2       | 14.04    | 15       | 15       | 14.7    | Q96I15  | SCLY         | 14.04    | 15       | 15       | 14.7    |
| Q8WX92  | COBRA1       | 14.03    | 15       | 15       | 14.7    | P49841  | GSK3B        | 13.97    | 15       | 15       | 14.7    | Q95402  | MED26        | 14.02    | 15       | 15       | 14.7    |
| Q9H4K7  | GTPBP5       | 13.96    | 15       | 15       | 14.7    | Q16566  | CAMK4        | 13.87    | 15       | 15       | 14.6    | P25054  | APC          | 13.92    | 15       | 15       | 14.6    |
| Q6NUQ4  | TMEM214      | 13.81    | 15       | 15       | 14.6    | Q9BSK2  | SLC25A33     | 13.75    | 15       | 15       | 14.6    | Q00537  | CDK17        | 13.78    | 15       | 15       | 14.6    |
| P12755  | SKI          | 13.75    | 15       | 15       | 14.6    | Q9HCU5  | PREB         | 13.61    | 15       | 15       | 14.5    | P36404  | ARL2         | 13.68    | 15       | 15       | 14.6    |
| Q9HAC8  | UBTD1        | 13.6     | 15       | 15       | 14.5    | Q09019  | DMWD         | 13.49    | 15       | 15       | 14.5    | O13907  | ID1          | 13.59    | 15       | 15       | 14.5    |
| Q8WU67  | ABHD3        | 13.47    | 15       | 15       | 14.5    | O43148  | RNMT         | 13.38    | 15       | 15       | 14.5    | O15344  | MID1         | 13.39    | 15       | 15       | 14.5    |
| Q9ZHC1  | MSL2         | 13.35    | 15       | 15       | 14.5    | O12955  | ANK3         | 13.25    | 15       | 15       | 14.4    | P29122  | PCSK6        | 13.34    | 15       | 15       | 14.4    |
| Q7Z6J8  | UBE3D        | 13.24    | 15       | 15       | 14.4    | Q9UBM7  | DHCR7        | 13.15    | 15       | 15       | 14.4    | Q96K12  | FAR2         | 13.23    | 15       | 15       | 14.4    |
| Q9BX10  | GTPBP2       | 13.14    | 15       | 15       | 14.4    | Q9Y282  | ERGIC3       | 13.05    | 15       | 15       | 14.4    | Q96Q15  | SMG1         | 13.12    | 15       | 15       | 14.4    |
| Q969E8  | TSR2         | 13.04    | 15       | 15       | 14.3    | Q96H55  | MYO19        | 12.99    | 15       | 15       | 14.3    | Q9UHB6  | LIMA1        | 13       | 15       | 15       | 14.3    |
| Q68CP9  | ARID2        | 12.99    | 15       | 15       | 14.3    | P49137  | MAPKAPK2     | 12.91    | 15       | 15       | 14.3    | O43896  | KIF1C        | 12.99    | 15       | 15       | 14.3    |
| Q9H334  | FOXP1        | 12.91    | 15       | 15       | 14.3    | O95453  | PARN         | 12.87    | 15       | 15       | 14.3    | Q8N8R5  | C2orf69      | 12.88    | 15       | 15       | 14.3    |
| Q9UN16  | DUSP12       | 12.84    | 15       | 15       | 14.3    | Q9NWQ9  | C14orf119    | 12.83    | 15       | 15       | 14.3    | Q8WI9   | MGA          | 12.84    | 15       | 15       | 14.3    |
| Q69YH5  | CDC42        | 12.82    | 15       | 15       | 14.3    | Q8TAA5  | GRPEL2       | 12.7     | 15       | 15       | 14.2    | O95625  | ZBTB11       | 12.72    | 15       | 15       | 14.2    |
| Q8IWZ6  | BBS7         | 12.69    | 15       | 15       | 14.2    | Q8N5K1  | CISD2        | 12.63    | 15       | 15       | 14.2    | Q96B26  | EXOSC8       | 12.67    | 15       | 15       | 14.2    |
| O14639  | ABLIM1       | 12.63    | 15       | 15       | 14.2    | O95229  | ZWINT        | 12.45    | 15       | 15       | 14.2    | Q95478  | NSA2         | 12.53    | 15       | 15       | 14.2    |
| Q9H5Q4  | TFB2M        | 12.43    | 15       | 15       | 14.1    | Q96EB6  | SIRT1        | 12.39    | 15       | 15       | 14.1    | Q9UBU6  | FAM8A1       | 12.42    | 15       | 15       | 14.1    |
| Q9ULW0  | TPX2         | 12.34    | 15       | 15       | 14.1    | O43482  | OIP5         | 12.34    | 15       | 15       | 14.1    | Q01433  | AMPD2        | 12.34    | 15       | 15       | 14.1    |
| Q86X76  | NIT1         | 12.3     | 15       | 15       | 14.1    | Q6P1K8  | GTF2H2D      | 12.18    | 15       | 15       | 14.1    | P41240  | CSK          | 12.27    | 15       | 15       | 14.1    |
| P49759  | CLK1         | 12.16    | 15       | 15       | 14.1    | Q9HCC0  | MCCC2        | 12.11    | 15       | 15       | 14.0    | Q8WUK0  | PTPMT1       | 12.15    | 15       | 15       | 14.1    |
| Q9Y3A3  | MOB4         | 12.07    | 15       | 15       | 14.0    | P60604  | UBE2G2       | 12.02    | 15       | 15       | 14.0    | Q9UHD8  | 9-Sep        | 12.02    | 15       | 15       | 14.0    |
| P17098  | ZNF8         | 12       | 15       | 15       | 14.0    | Q9Y320  | TMX2         | 12       | 15       | 15       | 14.0    | Q86VP1  | TAX1BP1      | 12       | 15       | 15       | 14.0    |
| Q9NYV6  | RRN3         | 11.97    | 15       | 15       | 14.0    | P25098  | ADRBK1       | 11.91    | 15       | 15       | 14.0    | Q8N5I9  | C12orf45     | 11.92    | 15       | 15       | 14.0    |
| Q9NVU0  | POLR3E       | 11.9     | 15       | 15       | 14.0    | Q9UM13  | ANAPC10      | 11.88    | 15       | 15       | 14.0    | Q96EY5  | FAM125A      | 11.9     | 15       | 15       | 14.0    |
| Q9NUW8  | TDP1         | 11.84    | 15       | 15       | 13.9    | Q9Y880  | FKBP7        | 11.84    | 15       | 15       | 13.9    | Q92560  | BAP1         | 11.84    | 15       | 15       | 13.9    |
| Q8NDV7  | TNRC6A       | 11.8     | 15       | 15       | 13.9    | P62253  | UBE2G1       | 11.77    | 15       | 15       | 13.9    | Q05048  | CSTF1        | 11.78    | 15       | 15       | 13.9    |
| Q8IVV7  | GID4         | 11.75    | 15       | 15       | 13.9    | P82932  | MRPS6        | 11.73    | 15       | 15       | 13.9    | Q96EE3  | SEH1L        | 11.73    | 15       | 15       | 13.9    |
| P78368  | CSNK1G2      | 11.71    | 15       | 15       |         |         |              |          |          |          |         |         |              |          |          |          |         |

| uniprot  | protein name   | ratio#01 | ratio#02 | ratio#03 | average | uniprot | protein name | ratio#01 | ratio#02 | ratio#03 | average | uniprot | protein name | ratio#01 | ratio#02 | ratio#03 | average |
|----------|----------------|----------|----------|----------|---------|---------|--------------|----------|----------|----------|---------|---------|--------------|----------|----------|----------|---------|
| Q8NOZ6   | TTC5           | 9.59     | 15       | 15       | 13.2    | Q9NUJ1  | DECR2        | 9.54     | 15       | 15       | 13.2    | Q2TAK8  | MUM1         | 9.57     | 15       | 15       | 13.2    |
| Q8NHQ9   | DDX55          | 9.48     | 15       | 15       | 13.2    | Q9HB90  | RRACG        | 9.2      | 15       | 15       | 13.1    | O75818  | RPP40        | 9.21     | 15       | 15       | 13.1    |
| P43686   | PSMC4          | 9.16     | 15       | 15       | 13.1    | Q8IV63  | VRK3         | 9.09     | 15       | 15       | 13.0    | Q10469  | MGAT2        | 9.12     | 15       | 15       | 13.0    |
| H3BN98   | Incharacterize | 9.07     | 15       | 15       | 13.0    | Q96D09  | GPRASP2      | 9        | 15       | 15       | 13.0    | Q8NBZ0  | INO80E       | 9.03     | 15       | 15       | 13.0    |
| O43678   | NDUFA2         | 9        | 15       | 15       | 13.0    | Q9Y2K1  | ZBTB1        | 8.96     | 15       | 15       | 13.0    | Q15047  | SETDB1       | 8.99     | 15       | 15       | 13.0    |
| Q969S3   | ZNF622         | 8.93     | 15       | 15       | 13.0    | Q93073  | SECISBP2L    | 8.87     | 15       | 15       | 13.0    | Q9NW66  | THG1L        | 8.93     | 15       | 15       | 13.0    |
| Q86VX9   | MON1A          | 8.84     | 15       | 15       | 12.9    | P62266  | RP523        | 8.79     | 15       | 15       | 12.9    | Q9UM82  | SPATA2       | 8.8      | 15       | 15       | 12.9    |
| Q8NI60   | ADCK3          | 8.71     | 15       | 15       | 12.9    | Q8TB61  | SLC35B2      | 8.59     | 15       | 15       | 12.9    | Q99538  | LGMM         | 8.61     | 15       | 15       | 12.9    |
| Q6Y2X3   | DNAJC14        | 8.58     | 15       | 15       | 12.9    | O60828  | PQBP1        | 8.47     | 15       | 15       | 12.8    | Q9ULJ7  | ANKRD50      | 8.54     | 15       | 15       | 12.8    |
| P30084   | ECHS1          | 8.44     | 15       | 15       | 12.8    | Q9H7N4  | SCAF1        | 8.36     | 15       | 15       | 12.8    | P55957  | BID          | 8.38     | 15       | 15       | 12.8    |
| Q5VY58   | ZCCHC6         | 8.32     | 15       | 15       | 12.8    | P78540  | ARG2         | 8.24     | 15       | 15       | 12.7    | Q13042  | CDC16        | 8.24     | 15       | 15       | 12.7    |
| Q9UPN9   | TRIM33         | 8.24     | 15       | 15       | 12.7    | Q9BRK4  | LZTS2        | 8.18     | 15       | 15       | 12.7    | Q8IWW6  | ARID3B       | 8.24     | 15       | 15       | 12.7    |
| Q96I25   | RBM17          | 8.17     | 15       | 15       | 12.7    | Q9P246  | STIM2        | 8.04     | 15       | 15       | 12.7    | Q5VWJ9  | SNX30        | 8.07     | 15       | 15       | 12.7    |
| Q8TE04   | PANK1          | 7.94     | 15       | 15       | 12.6    | G3V599  | CTAGE5       | 7.8      | 15       | 15       | 12.6    | Q6XZF7  | DNMBP        | 7.82     | 15       | 15       | 12.6    |
| O15320   | CTAGE5         | 7.8      | 15       | 15       | 12.6    | Q15813  | TBCE         | 7.57     | 15       | 15       | 12.5    | Q9H6U8  | ALG9         | 7.77     | 15       | 15       | 12.6    |
| P53814   | SMTN           | 7.57     | 15       | 15       | 12.5    | Q15154  | PCM1         | 7.5      | 15       | 15       | 12.5    | Q9H082  | RAB33B       | 7.5      | 15       | 15       | 12.5    |
| Q96HW7   | INTS4          | 7.42     | 15       | 15       | 12.5    | Q9Y5P8  | PPP2R3B      | 7.3      | 15       | 15       | 12.4    | Q99640  | PKMYT1       | 7.34     | 15       | 15       | 12.4    |
| Q9C0C7   | AMBRA1         | 7.2      | 15       | 15       | 12.4    | Q5T6F0  | DCAF12       | 7.01     | 15       | 15       | 12.3    | Q6ZTWO  | TPGS1        | 7.14     | 15       | 15       | 12.4    |
| Q8IZ73   | RPUSD2         | 6.8      | 15       | 15       | 12.3    | Q8WU76  | SCFD2        | 6.51     | 15       | 15       | 12.2    | Q9Y6A1  | POMT1        | 6.68     | 15       | 15       | 12.2    |
| Q8IUH4   | ZDHHC13        | 6.39     | 15       | 15       | 12.1    | Q9Y4E6  | WDR7         | 5.91     | 15       | 15       | 12.0    | Q9ULF5  | SLC39A10     | 6.27     | 15       | 15       | 12.1    |
| Q9HC00   | CSNK1G1        | 5.17     | 15       | 15       | 11.7    | P53671  | LIMK2        | 5.05     | 15       | 15       | 11.7    | Q9BZE9  | ASPSR1       | 5.16     | 15       | 15       | 11.7    |
| Q14197   | ICT1           | 4.93     | 15       | 15       | 11.6    | Q99741  | CDC6         | 4.66     | 15       | 15       | 11.5    | O15145  | ARPC3        | 4.84     | 15       | 15       | 11.6    |
| Q53GT1   | KLHL22         | 4.52     | 15       | 15       | 11.5    | Q8ND83  | SLAIN1       | 4.4      | 15       | 15       | 11.5    | O15235  | MRPS12       | 4.47     | 15       | 15       | 11.5    |
| Q9BZ29   | DOCK9          | 4.4      | 15       | 15       | 11.5    | Q9HDC5  | JPH1         | 4.33     | 15       | 15       | 11.4    | Q8TF30  | WHAMM        | 4.38     | 15       | 15       | 11.5    |
| Q96A35   | MRPL24         | 4.18     | 15       | 15       | 11.4    | H7BYW4  | GTPBP6       | 12.45    | 14.97    | 15       | 14.1    | Q9H936  | SLC25A22     | 15       | 14.97    | 15       | 15.0    |
| Q9P215   | POGK           | 15       | 14.96    | 15       | 15.0    | Q96AY2  | EME1         | 15       | 14.93    | 15       | 15.0    | Q6STE5  | SMARCD3      | 15       | 14.95    | 15       | 15.0    |
| Q8IW04   | MAP7D3         | 14.13    | 14.93    | 15       | 14.7    | Q16527  | CSR2         | 15       | 14.92    | 15       | 15.0    | Q96K76  | USP47        | 11.57    | 14.93    | 15       | 13.8    |
| Q4G0J3   | LARP7          | 15       | 14.89    | 15       | 15.0    | Q9H910  | HNL1         | 15       | 14.86    | 15       | 15.0    | Q9UNE7  | STUB1        | 14.27    | 14.88    | 15       | 14.7    |
| Q969J3   | LOH12CR1       | 15       | 14.84    | 15       | 14.9    | P18074  | ERCC2        | 12.44    | 14.84    | 15       | 14.1    | Q9Y6N1  | COX11        | 15       | 14.84    | 15       | 14.9    |
| Q9H3P7   | ACBD3          | 15       | 14.83    | 15       | 14.9    | P27448  | MARK3        | 14.1     | 14.83    | 15       | 14.6    | P50453  | SERPIN9      | 15       | 14.83    | 15       | 14.9    |
| P35226   | BMH1           | 15       | 14.81    | 15       | 14.9    | P49116  | NR2C2        | 15       | 14.78    | 15       | 14.9    | Q95429  | BAG4         | 15       | 14.8     | 15       | 14.9    |
| R82675   | MRPS5          | 10.14    | 14.78    | 15       | 13.3    | P58546  | MTPN         | 15       | 14.75    | 15       | 14.9    | Q9UBT7  | CTNNAL1      | 15       | 14.77    | 15       | 14.9    |
| Q92844   | TANK           | 15       | 14.71    | 15       | 14.9    | Q9UPT5  | EXOC7        | 15       | 14.7     | 15       | 14.9    | P10589  | NR2F1        | 15       | 14.71    | 15       | 14.9    |
| O14818   | PSMA7          | 15       | 14.69    | 15       | 14.9    | O43299  | AP5Z1        | 15       | 14.62    | 15       | 14.9    | Q6F181  | CIAPIN1      | 15       | 14.62    | 15       | 14.9    |
| Q96ME1   | FBXL18         | 15       | 14.57    | 15       | 14.9    | Q14692  | BMS1         | 5.39     | 14.57    | 15       | 11.7    | Q5T7W0  | ZNF618       | 9.53     | 14.57    | 15       | 13.0    |
| Q96SY0   | C15orf44       | 15       | 14.54    | 15       | 14.8    | Q9NV70  | EXOC1        | 13.47    | 14.54    | 15       | 14.3    | Q9HBM1  | SPC25        | 15       | 14.54    | 15       | 14.8    |
| Q96P11   | NSUN5          | 15       | 14.52    | 15       | 14.8    | Q9HAP2  | MLXIP        | 12.94    | 14.52    | 15       | 14.2    | Q13444  | ADAM15       | 15       | 14.52    | 15       | 14.8    |
| Q9NUA8   | ZBTB40         | 15       | 14.48    | 15       | 14.8    | O15258  | RER1         | 13.82    | 14.4     | 15       | 14.4    | Q96BW9  | TAMM41       | 15       | 14.44    | 15       | 14.8    |
| Q96F44   | TRIM11         | 4.27     | 14.38    | 15       | 11.2    | Q9N9X2  | MRPL17       | 15       | 14.29    | 15       | 14.8    | Q8N584  | TTC39C       | 15       | 14.29    | 15       | 14.8    |
| Q9BSU1   | C16orf70       | 15       | 14.24    | 15       | 14.7    | Q969V3  | NCLN         | 15       | 14.2     | 15       | 14.7    | Q86W42  | THOC6        | 15       | 14.22    | 15       | 14.7    |
| Q68D85   | NCR3LG1        | 15       | 14.2     | 15       | 14.7    | Q9NVH1  | DNAJC11      | 15       | 14.19    | 15       | 14.7    | Q9BZK7  | TBL1XR1      | 15       | 14.19    | 15       | 14.7    |
| Q15126   | PMVK           | 15       | 14.19    | 15       | 14.7    | Q9Y5P4  | COL4A3BP     | 15       | 14.16    | 15       | 14.7    | Q96DF8  | DGCR14       | 15       | 14.16    | 15       | 14.7    |
| Q9Y6A9   | SPCS1          | 15       | 14.16    | 15       | 14.7    | O60447  | EVH5         | 12.75    | 14.14    | 15       | 14.0    | Q9NV31  | IMP3         | 15       | 14.14    | 15       | 14.7    |
| Q9BRP1   | PDCD2L         | 15       | 14.11    | 15       | 14.7    | Q8WUX2  | CHAC2        | 15       | 14.04    | 15       | 14.7    | Q95169  | NDUF88       | 15       | 14.09    | 15       | 14.7    |
| O5T2T1   | MPP7           | 9.62     | 14.04    | 15       | 12.9    | Q96EQ0  | SGTB         | 15       | 14       | 15       | 14.7    | Q6DKJ4  | NXN          | 15       | 14.02    | 15       | 14.7    |
| Q8WUY1   | THEM6          | 15       | 13.99    | 15       | 14.7    | Q9Y2G0  | EFR3B        | 15       | 13.98    | 15       | 14.7    | Q99661  | KIF2C        | 15       | 13.99    | 15       | 14.7    |
| Q56N19   | ESCO2          | 15       | 13.96    | 15       | 14.7    | O60293  | ZFC3H1       | 15       | 13.91    | 15       | 14.6    | Q96ER9  | CCDC51       | 15       | 13.92    | 15       | 14.6    |
| P42898   | MTHFR          | 12.38    | 13.88    | 15       | 13.8    | Q86WR7  | C10orf47     | 15       | 13.85    | 15       | 14.6    | Q92613  | PHF16        | 15       | 13.86    | 15       | 14.6    |
| P35754   | GLRX           | 9.84     | 13.84    | 15       | 12.9    | Q5Y7D3  | HLA-DQB1     | 15       | 13.79    | 15       | 14.6    | Q8N9N7  | LRR57        | 15       | 13.8     | 15       | 14.6    |
| Q9NVX2   | NLE1           | 15       | 13.79    | 15       | 14.6    | Q5SU54  | HLA-DQB1     | 15       | 13.79    | 15       | 14.6    | Q9BUB5  | MKKN1        | 15       | 13.79    | 15       | 14.6    |
| Q9UGI8   | TES            | 10.71    | 13.78    | 15       | 13.2    | Q9NVH0  | EXD2         | 9.63     | 13.7     | 15       | 12.8    | Q27J81  | INF2         | 14.66    | 13.73    | 15       | 14.5    |
| Q94874   | UFL1           | 15       | 13.67    | 15       | 14.6    | Q86WA8  | LONP2        | 8.58     | 13.63    | 15       | 12.4    | Q6ZUT9  | DENND5B      | 15       | 13.67    | 15       | 14.6    |
| Q9Y4P1   | ATG4B          | 13.93    | 13.62    | 15       | 14.2    | P78332  | RBM6         | 15       | 13.59    | 15       | 14.5    | Q8WZA9  | IRGQ         | 12.28    | 13.61    | 15       | 13.6    |
| Q9H5N1   | RABEP2         | 15       | 13.56    | 15       | 14.5    | Q96CW6  | SLC7A6OS     | 8.87     | 13.52    | 15       | 12.5    | P30533  | LRPAP1       | 15       | 13.53    | 15       | 14.5    |
| P15056   | BRAF           | 15       | 13.48    | 15       | 14.5    | Q9UK41  | VPS28        | 15       | 13.47    | 15       | 14.5    | Q5TA45  | CP5F3L       | 9.42     | 13.48    | 15       | 12.6    |
| P36897   | TGFBR1         | 15       | 13.43    | 15       | 14.5    | P08235  | NR3C2        | 15       | 13.41    | 15       | 14.5    | P18615  | RDBP         | 14.23    | 13.42    | 15       | 14.2    |
| Q9H000   | MKRN2          | 15       | 13.39    | 15       | 14.5    | O60907  | TBL1X        | 7.84     | 13.38    | 15       | 12.1    | Q04721  | NOTCH2       | 7.5      | 13.39    | 15       | 12.0    |
| Q52LR7   | EPC2           | 4.89     | 13.38    | 15       | 11.1    | Q13555  | CAMK2G       | 15       | 13.36    | 15       | 14.5    | P01106  | MYC          | 7.17     | 13.37    | 15       | 11.8    |
| Q8TD30   | GPT2           | 15       | 13.32    | 15       | 14.4    | A2BFH1  | PPIAL4G      | 8.89     | 13.32    | 15       | 12.4    | P30837  | ALDH1B1      | 12.15    | 13.32    | 15       | 13.5    |
| Q02241   | KIF23          | 7.68     | 13.29    | 15       | 12.0    | Q16594  | TAF9         | 15       | 13.23    | 15       | 14.4    | Q12815  | TROP         | 15       | 13.27    | 15       | 14.4    |
| Q01850   | CDR2           | 15       | 13.23    | 15       | 14.4    | O14727  | APAF1        | 15       | 13.22    | 15       | 14.4    | Q7Z460  | CLASP1       | 13.93    | 13.23    | 15       | 14.1    |
| Q96EL2   | MRPS24         | 13.4     | 13.22    | 15       | 13.9    | Q86V87  | FAM160B2     | 15       | 13.2     | 15       | 14.4    | Q9H706  | FAM59A       | 15       | 13.21    | 15       | 14.4    |
| Q15654   | TRIP6          | 15       | 13.15    | 15       | 14.4    | Q9Y2H0  | DLGAP4       | 15       | 13.13    | 15       | 14.4    | Q03164  | MLL          | 15       | 13.15    | 15       | 14.4    |
| Q9Y6M4   | CSNK1G3        | 6.61     | 13.13    | 15       | 11.6    | Q70EL1  | USP54        | 15       | 13.11    | 15       | 14.4    | P78395  | PRAME        | 15       | 13.12    | 15       | 14.4    |
| Q9NV59   | PNPO           | 15       | 13.09    | 15       | 14.4    | Q15628  | TRADD        | 15       | 13.04    | 15       | 14.3    | Q9UKK9  | NUDT5        | 11.17    | 13.09    | 15       | 13.1    |
| P19447   | ERCC3          | 15       | 13       | 15       | 14.3    | Q9NX40  | OC1AD1       | 15       | 12.99    | 15       | 14.3    | Q9NPF0  | CDC320       | 15       | 13       | 15       | 14.3    |
| Q8N3R9   | MPP5           | 15       | 12.97    | 15       | 14.3    | Q9P2G9  | KLHL8        | 15       | 12.91    | 15       | 14.3    | E9PS11  | TM9SF1       | 15       | 12.97    | 15       | 14.3    |
| Q9H019   | FAM54B         | 15       | 12.88    | 15       | 14.3    | Q7L0Y3  | TRMT10C      | 13.98    | 12.85    | 15       | 13.9    | Q92541  | RYF1         | 11.07    | 12.86    | 15       | 13.0    |
| Q8TB75   | PIGX           | 15       | 12.84    | 15       | 14.3    | Q9NWH9  | SLTM         | 8.95     | 12.79    | 15       | 12.2    | Q6PCD5  | RFWD3        | 15       | 12.83    | 15       | 14.3    |
| Q9NV17   | ATAD3A         | 10.63    | 12.78    | 15       | 12.8    | Q8NEM7  | FAM48A       | 15       | 12.75    | 15       | 14.3    | P23743  | DGKA         | 15       | 12.76    | 15       | 14.3    |
| Q9Y508   | RNF114         | 7.24     | 12.71    | 15       | 11.7    | Q9NUQ3  | TXLNG        | 10.93    | 12.65    | 15       | 12.9    | P16083  | NQO2         | 11.5     | 12.67    | 15       | 13.1    |
| Q9H0S4   | DDX47          | 8.76     | 12.65    | 15       | 12.1    | O96000  | NDUF10B      | 15       | 12.61    | 15       | 14.2    | Q147X3  | NAA30        | 12.4     | 12.64    | 15       | 13.3    |
| Q49AR2   | C5orf22        | 11.74    | 12.6     | 15       | 13.1    | Q96Q89  | KIF20B       | 15       | 12.55    | 15       | 14.2    | Q9H8H9  | MKKN2        | 15       | 12.58    | 15       | 14.2    |
| O15085   | ARHGFEF11      | 15       | 12.55    | 15       | 14.2    | Q9H8H2  | DDX31        | 15       | 12.5     | 15       | 14.2    | Q96EK7  | FAM120B      | 15       | 12.54    | 15       | 14.2    |
| Q9NYL2   | MLTK           | 15       | 12.45    | 15       | 14.2    | Q5M775  | SPECC1       | 15       | 12.38    | 15       | 14.1    | Q8WXE0  | CASKIN2      | 11.62    | 12.41    | 15       | 13.0    |
| Q96571   | ETHE1          | 15       | 12.37    | 15       | 14.1    | Q96R17  | TUBGCP6      | 15       | 12.34    | 15       | 14.1    | Q9H869  | YY1AP1       | 15       | 12.35    | 15       | 14.1    |
| Q12802</ |                |          |          |          |         |         |              |          |          |          |         |         |              |          |          |          |         |

| uniprot | protein name | ratio#01 | ratio#02 | ratio#03 | average | uniprot | protein name | ratio#01 | ratio#02 | ratio#03 | average | uniprot | protein name   | ratio#01 | ratio#02 | ratio#03 | average |
|---------|--------------|----------|----------|----------|---------|---------|--------------|----------|----------|----------|---------|---------|----------------|----------|----------|----------|---------|
| Q96RY7  | IIFT140      | 15       | 10.93    | 15       | 13.6    | Q86WRO  | CCDC25       | 15       | 10.92    | 15       | 13.6    | P50225  | SULT1A1        | 12.21    | 10.93    | 15       | 12.7    |
| Q8WUJA  | GTF3C2       | 15       | 10.92    | 15       | 13.6    | Q96HE9  | PRR11        | 15       | 10.87    | 15       | 13.6    | Q9H074  | PAIP1          | 15       | 10.89    | 15       | 13.6    |
| Q8NGCH  | CHST14       | 15       | 10.77    | 15       | 13.6    | P19623  | SRM          | 15       | 10.67    | 15       | 13.6    | Q01658  | DR1            | 15       | 10.76    | 15       | 13.6    |
| P06280  | GLA          | 11.02    | 10.63    | 15       | 12.2    | Q10472  | GALNT1       | 6.73     | 10.62    | 15       | 10.8    | O60333  | KIF1B          | 9.87     | 10.62    | 15       | 11.8    |
| Q8WVJ2  | NUDCD2       | 10.77    | 10.59    | 15       | 12.1    | Q12980  | NPRL3        | 15       | 10.54    | 15       | 13.5    | Q9H081  | MIS12          | 15       | 10.58    | 15       | 13.5    |
| Q9UPY8  | MAPP3E       | 15       | 10.53    | 15       | 13.5    | P30825  | SLC7A1       | 13.69    | 10.45    | 15       | 13.0    | Q9Y5B6  | GCFC1          | 15       | 10.49    | 15       | 13.5    |
| Q9NUM4  | TMEM106B     | 15       | 10.44    | 15       | 13.5    | Q6GMV3  | PTRHD1       | 15       | 10.4     | 15       | 13.5    | Q7Z589  | EMSY           | 15       | 10.42    | 15       | 13.5    |
| Q9UKL0  | RCOR1        | 15       | 10.37    | 15       | 13.5    | Q8IYR2  | SMYD4        | 9.1      | 10.37    | 15       | 11.5    | Q5T3U5  | ABCC10         | 15       | 10.37    | 15       | 13.5    |
| Q53EL6  | PDCD4        | 15       | 10.36    | 15       | 13.5    | Q9BRJ7  | NUDT16L1     | 15       | 10.26    | 15       | 13.4    | HOYN99  | PEAK1          | 15       | 10.33    | 15       | 13.4    |
| Q6P087  | RPUSD3       | 15       | 10.25    | 15       | 13.4    | Q9NXW9  | ALKBH4       | 5.67     | 10.23    | 15       | 10.3    | Q9H0R6  | QRSL1          | 15       | 10.24    | 15       | 13.4    |
| O15226  | NKRF         | 15       | 10.2     | 15       | 13.4    | Q9NUQ9  | FAM49B       | 15       | 10.06    | 15       | 13.4    | Q9BWM7  | SFXN3          | 12.96    | 10.08    | 15       | 12.7    |
| Q2TAZ0  | ATG2A        | 15       | 10.01    | 15       | 13.3    | Q9UHG3  | PCYOX1       | 6.96     | 9.95     | 15       | 10.6    | P50750  | CDK9           | 15       | 9.98     | 15       | 13.3    |
| Q16831  | UPP1         | 8.77     | 9.94     | 15       | 11.2    | Q8IX04  | UEVLD        | 8.17     | 9.93     | 15       | 11.0    | Q9H2D6  | TRIOBP         | 5.2      | 9.94     | 15       | 10.0    |
| Q96JH8  | RADIL        | 15       | 9.86     | 15       | 13.3    | Q43818  | RRP9         | 15       | 9.83     | 15       | 13.3    | Q9UHR4  | BAIAP2L1       | 15       | 9.83     | 15       | 13.3    |
| Q8N5F7  | NKAP         | 7.23     | 9.79     | 15       | 10.7    | Q9NPH0  | ACP6         | 15       | 9.69     | 15       | 13.2    | Q9P2K8  | EIF2AK4        | 15       | 9.72     | 15       | 13.2    |
| Q01167  | FOXK2        | 12.3     | 9.67     | 15       | 12.3    | Q96RS0  | TGS1         | 15       | 9.64     | 15       | 13.2    | P49795  | RGS19          | 9.43     | 9.66     | 15       | 11.4    |
| Q96BW5  | PTER         | 15       | 9.64     | 15       | 13.2    | P49407  | ARRB1        | 15       | 9.56     | 15       | 13.2    | O75340  | PTCDC6         | 15       | 9.63     | 15       | 13.2    |
| Q06587  | RING1        | 15       | 9.52     | 15       | 13.2    | Q92620  | DHX38        | 15       | 9.48     | 15       | 13.2    | P49458  | SRP9           | 15       | 9.52     | 15       | 13.2    |
| O14773  | TPP1         | 4.53     | 9.48     | 15       | 9.7     | Q9NQZ2  | UTP3         | 15       | 9.37     | 15       | 13.1    | Q9B989  | KIAA1671       | 15       | 9.45     | 15       | 13.2    |
| Q4KWVH8 | PLCH1        | 12.73    | 9.37     | 15       | 12.4    | Q16891  | IMMT         | 15       | 9.34     | 15       | 13.1    | Q15386  | UBE3C          | 7.59     | 9.35     | 15       | 10.6    |
| Q9Y4P8  | WIPI2        | 15       | 9.34     | 15       | 13.1    | Q9BRJ2  | MRPL45       | 15       | 9.25     | 15       | 13.1    | O75489  | NDUFS3         | 15       | 9.27     | 15       | 13.1    |
| P78549  | NTHL1        | 15       | 9.23     | 15       | 13.1    | O175192 | PEX11A       | 15       | 9.17     | 15       | 13.1    | P53794  | SLCSA3         | 15       | 9.2      | 15       | 13.1    |
| P98170  | XIAP         | 15       | 9.13     | 15       | 13.0    | Q9BZ23  | PANK2        | 15       | 9.12     | 15       | 13.0    | P49257  | LMAN1          | 10.75    | 9.13     | 15       | 11.6    |
| Q9UQL6  | HDAC5        | 15       | 9.11     | 15       | 13.0    | O151311 | KPNA5        | 13.95    | 9.08     | 15       | 12.7    | Q6P3S6  | FBXO42         | 9.01     | 9.11     | 15       | 11.0    |
| P56381  | ATP5E        | 15       | 9.07     | 15       | 13.0    | Q92696  | RABGGTA      | 4.85     | 9.07     | 15       | 9.6     | Q5VTU8  | ATP5E2         | 15       | 9.07     | 15       | 13.0    |
| Q92466  | DBB2         | 15       | 9.04     | 15       | 13.0    | Q9NRD5  | PICK1        | 9.7      | 9.03     | 15       | 11.2    | Q9NZ09  | UBAP1          | 15       | 9.03     | 15       | 13.0    |
| Q9UJ3V  | MID2         | 11.43    | 9.02     | 15       | 11.8    | Q0VQ06  | FAAP100      | 15       | 8.97     | 15       | 13.0    | O75431  | MTX2           | 15       | 8.98     | 15       | 13.0    |
| Q16186  | ADRM1        | 7.14     | 8.92     | 15       | 10.4    | Q96RN5  | MED15        | 9.22     | 8.9      | 15       | 11.0    | O60518  | RANBP6         | 13.87    | 8.91     | 15       | 12.6    |
| O96006  | ZBED1        | 15       | 8.88     | 15       | 13.0    | Q9Y3L3  | SH3BP1       | 10.33    | 8.84     | 15       | 11.4    | O5JUR7  | TEXP30         | 15       | 8.85     | 15       | 13.0    |
| Q6ZW31  | SYDE1        | 15       | 8.82     | 15       | 12.9    | Q14155  | ARHGEF7      | 15       | 8.8      | 15       | 12.9    | Q7Z4H8  | KDEL2          | 15       | 8.81     | 15       | 12.9    |
| P13056  | NR2C1        | 8.88     | 8.79     | 15       | 10.9    | P57081  | WDR4         | 15       | 8.7      | 15       | 12.9    | Q58EX7  | PLEKHG4        | 15       | 8.72     | 15       | 12.9    |
| Q68DQ2  | CRYBG3       | 15       | 8.65     | 15       | 12.9    | O95340  | PAPSS2       | 12.14    | 8.63     | 15       | 11.9    | Q9NZ28  | FAM120A        | 14.05    | 8.63     | 15       | 12.6    |
| Q13136  | PPF1A1       | 15       | 8.62     | 15       | 12.9    | Q8NFH5  | NUP35        | 10.39    | 8.56     | 15       | 11.3    | Q9UPQ9  | TNRC6B         | 13.29    | 8.58     | 15       | 12.3    |
| P30414  | NKTR         | 10.15    | 8.54     | 15       | 11.2    | Q13459  | MYO9B        | 15       | 8.48     | 15       | 12.8    | A6N7J8  | METTL15        | 4.96     | 8.5      | 15       | 9.5     |
| Q9ULH1  | ASAP1        | 15       | 8.46     | 15       | 12.8    | Q7Z6M1  | RABEPK       | 14.84    | 8.41     | 15       | 12.8    | P63146  | UBE2B          | 15       | 8.45     | 15       | 12.8    |
| Q9UMR2  | DDX19B       | 7.4      | 8.41     | 15       | 10.3    | P16333  | NCK1         | 15       | 8.37     | 15       | 12.8    | Q9Y4X0  | AMMECR1        | 15       | 8.4      | 15       | 12.8    |
| Q96AJ1  | CLUAP1       | 15       | 8.36     | 15       | 12.8    | O75155  | CAND2        | 12.25    | 8.22     | 15       | 11.8    | O14641  | DVL2           | 7.25     | 8.27     | 15       | 10.2    |
| Q8WV41  | SNX33        | 15       | 8.19     | 15       | 12.7    | P39880  | CUX1         | 7.67     | 8.15     | 15       | 10.3    | Q6Q0C0  | TRAF7          | 7.54     | 8.19     | 15       | 10.2    |
| O94813  | SLIT2        | 7.77     | 8.14     | 15       | 10.3    | O75676  | RPS6KA4      | 15       | 8.08     | 15       | 12.7    | F8VZW7  | Incharacterize | 15       | 8.09     | 15       | 12.7    |
| P19086  | GNAZ         | 15       | 8.08     | 15       | 12.7    | Q7Z333  | SETX         | 15       | 8        | 15       | 12.7    | Q8TD26  | CHD6           | 7.97     | 8.06     | 15       | 10.3    |
| Q8N3X1  | FNBP4        | 10.29    | 7.99     | 15       | 11.1    | Q8N5P1  | ZC3H8        | 15       | 7.95     | 15       | 12.7    | Q6UOX7  | DHR513         | 11.46    | 7.97     | 15       | 11.5    |
| Q8NBN7  | RDH13        | 15       | 7.94     | 15       | 12.6    | Q15788  | NCOA1        | 7.55     | 7.9      | 15       | 10.2    | O75477  | ERLIN1         | 15       | 7.93     | 15       | 12.6    |
| Q92802  | N4BP2L2      | 13.07    | 7.89     | 15       | 12.0    | Q8IVH2  | FOXPA4       | 15       | 7.86     | 15       | 12.6    | O43505  | B3GNT1         | 15       | 7.88     | 15       | 12.6    |
| Q9UPZ3  | HPS5         | 15       | 7.83     | 15       | 12.6    | Q14207  | NPAT         | 15       | 7.71     | 15       | 12.6    | Q96S38  | RPS6KC1        | 8.59     | 7.72     | 15       | 10.4    |
| Q5SYE7  | NHSL1        | 15       | 7.71     | 15       | 12.6    | Q8WWW59 | SPRYD4       | 11.88    | 7.63     | 15       | 11.5    | P49959  | MRE11A         | 4.34     | 7.66     | 15       | 9.0     |
| Q8IWXZ  | SUGP1        | 10.73    | 7.63     | 15       | 11.1    | Q9UBP0  | SPAST        | 5.66     | 7.62     | 15       | 9.4     | Q32NB8  | PGS1           | 15       | 7.62     | 15       | 12.5    |
| O60870  | KIN          | 15       | 7.58     | 15       | 12.5    | Q9HCM3  | KIAA1549     | 8.07     | 7.43     | 15       | 10.2    | O95243  | MBD4           | 8.74     | 7.45     | 15       | 10.4    |
| P78362  | SRPK2        | 15       | 7.35     | 15       | 12.5    | Q9BXF3  | CECR2        | 15       | 7.34     | 15       | 12.4    | P09884  | POLA1          | 15       | 7.34     | 15       | 12.4    |
| Q9N0X3  | GPHN         | 9.69     | 7.29     | 15       | 10.7    | P17050  | NAGA         | 15       | 7.08     | 15       | 12.4    | Q9ZF2F  | OSBPL8         | 9.29     | 7.29     | 15       | 10.5    |
| Q6UUV9  | CRTC1        | 15       | 7.06     | 15       | 12.4    | O60508  | CDC40        | 15       | 7.01     | 15       | 12.3    | Q8NC56  | LEMD2          | 7.81     | 7.05     | 15       | 10.0    |
| Q13137  | CALCOCO2     | 15       | 6.96     | 15       | 12.3    | Q96C01  | FAM136A      | 15       | 6.54     | 15       | 12.2    | O14646  | CHD1           | 8.7      | 6.76     | 15       | 10.2    |
| P42226  | STAT6        | 6.18     | 6.54     | 15       | 9.2     | Q9POU4  | CXXC1        | 7.09     | 6.47     | 15       | 9.5     | O60841  | EIF5B          | 13.88    | 6.47     | 15       | 11.8    |
| P34949  | MPI          | 7.46     | 6.4      | 15       | 9.6     | Q5TKA1  | LIN9         | 10.42    | 6.23     | 15       | 10.6    | P40425  | PBX2           | 15       | 6.28     | 15       | 12.1    |
| P29353  | SHC1         | 9.79     | 6.21     | 15       | 10.3    | P49757  | NUMB         | 11.69    | 6.07     | 15       | 10.9    | Q86SQ9  | DHDDS          | 6.24     | 6.15     | 15       | 9.1     |
| O94887  | FARF2        | 15       | 6.01     | 15       | 12.0    | Q96JM7  | L3MBTL3      | 15       | 5.98     | 15       | 12.0    | Q66K74  | MAP1S          | 7.56     | 6.01     | 15       | 9.5     |
| P98174  | FGD1         | 15       | 5.87     | 15       | 12.0    | Q66K64  | DCAF15       | 15       | 5.79     | 15       | 11.9    | Q9Y2K7  | KDM2A          | 13.11    | 5.87     | 15       | 11.3    |
| Q9UK61  | FAM208A      | 5.84     | 5.71     | 15       | 8.9     | Q9Y3C0  | CCDC53       | 15       | 5.61     | 15       | 11.9    | O95409  | ZIC2           | 11.92    | 5.63     | 15       | 10.9    |
| Q43826  | SLC37A4      | 9.98     | 5.48     | 15       | 10.2    | Q8IV63  | AMOTL1       | 8.03     | 5.39     | 15       | 9.5     | P49750  | YLP1M1         | 13.3     | 5.41     | 15       | 11.2    |
| Q9UGR2  | ZC3H7B       | 15       | 5.34     | 15       | 11.8    | Q6P2I3  | FAHD2B       | 10.04    | 5.07     | 15       | 10.0    | Q5XUX1  | FBXW9          | 15       | 5.1      | 15       | 11.7    |
| Q14814  | MEF2D        | 9.28     | 5        | 15       | 9.8     | Q6ZRV2  | FAM83H       | 15       | 4.8      | 15       | 11.6    | Q9C0D3  | ZYG11B         | 15       | 4.88     | 15       | 11.6    |
| Q86UP3  | ZFH4         | 15       | 4.8      | 15       | 11.6    | P15151  | PVR          | 11.34    | 4.78     | 15       | 10.4    | Q92791  | LEPREL4        | 15       | 4.78     | 15       | 11.6    |
| Q659C4  | LARP1B       | 11.5     | 4.66     | 15       | 10.4    | O75354  | ENTPD6       | 15       | 4.6      | 15       | 11.5    | O94761  | RECQL4         | 14.06    | 4.61     | 15       | 11.2    |
| Q6DN90  | IQSEC1       | 5.46     | 4.59     | 15       | 8.4     | Q7Z7N9  | TMEM179B     | 8.5      | 4.45     | 15       | 9.3     | Q92609  | TBC1D5         | 15       | 4.54     | 15       | 11.5    |
| O95260  | ATE1         | 15       | 4.37     | 15       | 11.5    | Q9UKV8  | EIF2C2       | 15       | 4.25     | 15       | 11.4    | Q02040  | AKAP17A        | 10.84    | 4.3      | 15       | 10.0    |
| P17480  | UBTF         | 4.71     | 4.22     | 15       | 8.0     | Q92615  | LARP4B       | 15       | 4.02     | 15       | 11.3    | Q9H1B7  | IRF2BP1        | 13.46    | 4.06     | 15       | 10.8    |
| P52292  | KPNA2        | 15       | 15       | 14.98    | 15.0    | Q9UHI6  | DDX20        | 11       | 15       | 14.98    | 13.7    | Q08431  | MFE8           | 15       | 15       | 14.98    | 15.0    |
| Q12893  | TMEM115      | 15       | 15       | 14.97    | 15.0    | O6PCB5  | RBNL1        | 15       | 15       | 14.96    | 15.0    | O94905  | ERLIN2         | 7.76     | 7.57     | 14.97    | 10.1    |
| P51970  | NDUFA8       | 15       | 15       | 14.96    | 15.0    | P49903  | SEPHS1       | 15       | 15       | 14.94    | 15.0    | P55145  | MANF           | 15       | 15       | 14.95    | 15.0    |
| P51946  | CCNH         | 15       | 15       | 14.94    | 15.0    | Q99871  | HAUS7        | 15       | 15       | 14.93    | 15.0    | P84022  | SMAD3          | 15       | 15       | 14.93    | 15.0    |
| O15198  | SMAD9        | 15       | 15       | 14.93    | 15.0    | Q15067  | ACOX1        | 15       | 15       | 14.92    | 15.0    | P35611  | ADD1           | 15       | 14.65    | 14.93    | 14.9    |
| Q99714  | HSD17B10     | 15       | 15       | 14.91    | 15.0    | Q8WZ74  | CTTNBP2      | 15       | 15       | 14.91    | 15.0    | Q96QU8  | XPO6           | 15       | 15       | 14.91    | 15.0    |
| Q8IYS1  | PM20D2       | 15       | 15       | 14.9     | 15.0    | Q70UQ0  | IKBP1        | 15       | 15       | 14.89    | 15.0    | Q8NEU8  | APPL2          | 15       | 15       | 14.89    | 15.0    |
| P54578  | USP14        | 9.89     | 15       | 14.89    | 13.3    | Q8TEY7  | USP33        | 15       | 15       | 14.88    | 15.0    | P85299  | PRR5           | 5.87     | 15       | 14.89    | 11.9    |
| Q9ULK4  | MED23        | 15       | 12.89    | 14.88    | 14.3    | Q5T2N8  | ATAD3C       | 10.63    | 7.5      | 14.86    | 11.0    | Q5T160  | RARS2          | 15       | 8.37     | 14.87    | 12.7    |
| Q13043  | STK4         | 15       | 15       | 14.85    | 15.0    | Q8TEK3  | DOT1L        | 15       | 7.99     | 14.84    | 12.6    | Q00765  | REEP5          | 15       | 15       | 14.84    | 14.9    |
| Q04206  | RELA         | 6.06     | 5.51     | 14.84    | 8.8     | O95057  | DIRAS1       | 7.57     | 9.75     | 14.83    | 10.7    | Q9B178  | COPS4          | 15       | 12.29    | 14.83    | 14.0    |
| P07197  | NEFM         | 1        |          |          |         |         |              |          |          |          |         |         |                |          |          |          |         |

| uniprot | protein name | ratio#01 | ratio#02 | ratio#03 | average | uniprot | protein name | ratio#01 | ratio#02 | ratio#03 | average | uniprot | protein name | ratio#01 | ratio#02 | ratio#03 | average |
|---------|--------------|----------|----------|----------|---------|---------|--------------|----------|----------|----------|---------|---------|--------------|----------|----------|----------|---------|
| Q5T440  | IBA57        | 15       | 15       | 14.25    | 14.8    | Q86UX6  | STK32C       | 15       | 15       | 14.22    | 14.7    | P54105  | CLNS1A       | 15       | 15       | 14.22    | 14.7    |
| Q57330  | GPATCH7      | 7.34     | 15       | 14.22    | 12.2    | Q9Y2R4  | DDX52        | 15       | 4.48     | 14.22    | 11.2    | Q86UV5  | USP48        | 15       | 14.53    | 14.22    | 14.6    |
| P62195  | PSMC5        | 15       | 15       | 14.21    | 14.7    | Q14790  | CASP8        | 5.82     | 4.25     | 14.19    | 8.1     | O95639  | CPSF4        | 8.87     | 15       | 14.21    | 12.7    |
| Q75150  | RNF40        | 15       | 12.77    | 14.18    | 14.0    | Q68EM7  | ARHGAP17     | 15       | 15       | 14.14    | 14.7    | Q9NUQ8  | ABCF3        | 15       | 9.75     | 14.18    | 13.0    |
| Q9Y2Y0  | ARL2BP       | 13.84    | 14.49    | 14.14    | 14.2    | Q5W0V3  | FAM160B1     | 15       | 15       | 14.12    | 14.7    | O95405  | ZFYVE9       | 15       | 15       | 14.13    | 14.7    |
| Q9P0L0  | VAPA         | 15       | 14.4     | 14.12    | 14.5    | P21953  | BCKDHB       | 15       | 15       | 14.08    | 14.7    | P49848  | TAFF6        | 15       | 13.69    | 14.09    | 14.3    |
| Q43663  | PRC1         | 14.84    | 15       | 14.08    | 14.6    | Q92674  | CENPI        | 15       | 15       | 14.07    | 14.7    | O15530  | PDPK1        | 10.74    | 9.18     | 14.08    | 11.3    |
| Q6XUX3  | DSTYK        | 11.62    | 15       | 14.07    | 13.6    | O14974  | PPP1R12A     | 9.44     | 9.28     | 14.07    | 10.9    | Q9NXN4  | GDAP2        | 15       | 11.49    | 14.07    | 13.5    |
| Q8IWD4  | CCDC117      | 15       | 15       | 14.06    | 14.7    | Q8IX18  | DHX40        | 9.24     | 5.98     | 14.06    | 9.8     | Q9H425  | C1orf198     | 15       | 9.96     | 14.06    | 13.0    |
| Q9BSJ6  | FAM64A       | 15       | 15       | 14.05    | 14.7    | Q8WTT2  | NOC3L        | 15       | 13.44    | 14.04    | 14.2    | Q6UWE0  | LRSAM1       | 9.09     | 15       | 14.04    | 12.7    |
| Q43264  | ZW10         | 9.14     | 15       | 14.02    | 12.7    | P18463  | HLA-B        | 14.94    | 15       | 14.01    | 14.7    | Q04826  | HLA-B        | 14.94    | 15       | 14.01    | 14.7    |
| Q9UER7  | DAXX         | 15       | 13.46    | 14.01    | 14.2    | Q8TB03  | CXorf38      | 15       | 15       | 13.99    | 14.7    | Q9HC62  | SENP2        | 15       | 15       | 14       | 14.7    |
| P17706  | PTPN2        | 14.25    | 15       | 13.97    | 14.4    | Q9H9Q2  | COPS7B       | 15       | 15       | 13.96    | 14.7    | Q86WB0  | ZC3HC1       | 12.53    | 15       | 13.97    | 13.8    |
| Q9Y272  | PIKFYVE      | 10.7     | 15       | 13.96    | 13.2    | Q9NRZ5  | AGPAT4       | 14.73    | 15       | 13.94    | 14.6    | Q8NFC6  | BOD1L1       | 8.7      | 4.6      | 13.96    | 9.1     |
| P84095  | RHOQ         | 11.77    | 10.8     | 13.94    | 12.2    | Q9UJKV5 | AMFR         | 15       | 15       | 13.92    | 14.6    | O14681  | EI24         | 11.84    | 15       | 13.93    | 13.6    |
| Q42695  | NCAPD3       | 10.66    | 15       | 13.9     | 13.2    | Q9NXV6  | NSMCE4A      | 15       | 15       | 13.88    | 14.6    | P78537  | BLOC1S1      | 15       | 15       | 13.89    | 14.6    |
| Q95904  | EYA3         | 15       | 15       | 13.88    | 14.6    | O94788  | ALDH1A2      | 15       | 15       | 13.87    | 14.6    | P55769  | NHPFL2       | 11.78    | 15       | 13.88    | 13.6    |
| Q9UPN4  | AZI1         | 15       | 15       | 13.87    | 14.6    | P50748  | KNTC1        | 5.29     | 10.06    | 13.87    | 9.7     | P48444  | ARCN1        | 8.75     | 12.62    | 13.87    | 11.7    |
| Q8N4C8  | MINK1        | 9.88     | 9.87     | 13.87    | 11.2    | Q15181  | PPA1         | 14.68    | 14.87    | 13.85    | 14.5    | Q14919  | DRAP1        | 7.43     | 15       | 13.85    | 12.1    |
| Q723C6  | ATG9A        | 15       | 15       | 13.84    | 14.6    | Q9Y5W9  | SNX11        | 15       | 15       | 13.82    | 14.6    | Q14999  | CUL7         | 15       | 12.41    | 13.84    | 13.8    |
| Q8N5M4  | TTC9C        | 15       | 15       | 13.82    | 14.6    | Q8NB14  | USP38        | 15       | 15       | 13.8     | 14.6    | P15061  | WDR43        | 11.53    | 15       | 13.82    | 13.5    |
| P04637  | TP53         | 9.58     | 13.47    | 13.8     | 12.3    | Q13685  | AAMP         | 13.12    | 10.14    | 13.8     | 12.4    | P20810  | CAST         | 8.29     | 11.91    | 13.8     | 11.3    |
| Q9NUV9  | ARMC1        | 15       | 15       | 13.79    | 14.6    | O95249  | GOSR1        | 15       | 15       | 13.78    | 14.6    | Q5VT25  | CDC42BPA     | 8.23     | 9.16     | 13.79    | 10.4    |
| P78348  | ASIC1        | 13.45    | 15       | 13.77    | 14.1    | Q9NX14  | NDUFB11      | 15       | 13.67    | 13.76    | 14.1    | Q6NTE8  | C5orf45      | 12.25    | 15       | 13.76    | 13.7    |
| Q86V85  | GPR180       | 15       | 15       | 13.75    | 14.6    | Q8WVQ1  | CANT1        | 11.83    | 11.13    | 13.74    | 12.2    | Q9H7B2  | RPF2         | 10.45    | 7.02     | 13.75    | 10.4    |
| P27361  | MAPK3        | 15       | 15       | 13.73    | 14.6    | Q8NHP6  | MOSPD2       | 15       | 15       | 13.72    | 14.6    | Q04864  | REL          | 15       | 15       | 13.72    | 14.6    |
| Q9NWZ5  | UCKL1        | 15       | 15       | 13.72    | 14.6    | Q96UE6  | RRP36        | 15       | 15       | 13.71    | 14.6    | Q6YHU6  | THADA        | 8.44     | 15       | 13.72    | 12.4    |
| Q96L92  | SNX27        | 10.74    | 15       | 13.71    | 13.2    | Q8N371  | KDM8         | 13.72    | 15       | 13.7     | 14.1    | O75191  | XYLB         | 15       | 13.39    | 13.71    | 14.0    |
| Q9UFW8  | CGGBP1       | 15       | 11.8     | 13.7     | 13.5    | Q9BWW5  | TIPIN        | 15       | 15       | 13.66    | 14.6    | Q53H96  | PYCRL        | 15       | 15       | 13.68    | 14.6    |
| P35219  | CA8          | 10.33    | 6.42     | 13.64    | 10.1    | Q9Y5W7  | SNX14        | 15       | 10.95    | 13.63    | 13.2    | P46060  | RANGAP1      | 13.14    | 15       | 13.63    | 13.9    |
| Q14165  | MLEC         | 15       | 15       | 13.62    | 14.5    | O00213  | APBB1        | 12.32    | 14.72    | 13.61    | 13.6    | O43314  | PP1P5K2      | 10.26    | 15       | 13.62    | 13.0    |
| Q9NP90  | RAB9B        | 15       | 15       | 13.59    | 14.5    | Q00059  | TFAM         | 15       | 15       | 13.58    | 14.5    | Q14191  | WRN          | 5.35     | 8.68     | 13.59    | 9.2     |
| Q13362  | PPP2R5C      | 8.81     | 13.35    | 13.58    | 11.9    | Q14156  | EFR3A        | 15       | 15       | 13.57    | 14.5    | Q8WWH5  | TRUB1        | 14.54    | 10.79    | 13.58    | 13.0    |
| Q9HAD4  | WDR41        | 15       | 10.7     | 13.57    | 13.1    | Q9UEY8  | ADD3         | 12.48    | 15       | 13.55    | 13.7    | Q9Y008  | LRRFIP2      | 15       | 15       | 13.56    | 14.5    |
| Q8N392  | ARHGAP18     | 15       | 15       | 13.54    | 14.5    | P49815  | TSC2         | 12.99    | 15       | 13.54    | 13.8    | Q9Y388  | RBMX2        | 15       | 15       | 13.54    | 14.5    |
| Q8NFW8  | CMAS         | 14.63    | 15       | 13.53    | 14.4    | O75886  | STAM2        | 11.62    | 15       | 13.51    | 13.4    | Q00587  | CDC42EP1     | 10.2     | 15       | 13.52    | 12.9    |
| B1AHC4  | ARHGAP8      | 10.96    | 15       | 13.5     | 13.2    | Q9GZT3  | SLIRP        | 8.65     | 6.34     | 13.49    | 9.5     | Q6P3X3  | TTG27        | 15       | 12.29    | 13.5     | 13.6    |
| Q9UBS0  | RPS6KB2      | 15       | 15       | 13.46    | 14.5    | Q15596  | NCOA2        | 12.75    | 15       | 13.46    | 13.7    | Q6UW14  | SHISA2       | 15       | 15       | 13.46    | 14.5    |
| Q9UBN7  | HDAC6        | 6.97     | 15       | 13.46    | 11.8    | Q8N6M3  | FITM2        | 15       | 15       | 13.45    | 14.5    | Q16543  | CDC37        | 11.13    | 13.71    | 13.46    | 12.8    |
| Q08J23  | NSUN2        | 14.7     | 15       | 13.44    | 14.4    | O14746  | COG2         | 15       | 15       | 13.43    | 14.5    | Q9NWY4  | C4orf27      | 10.49    | 15       | 13.44    | 13.0    |
| Q6PL24  | TMED8        | 15       | 15       | 13.43    | 14.5    | Q9BV38  | WDR18        | 13.61    | 15       | 13.42    | 14.0    | Q9C0B0  | UNK          | 15       | 15       | 13.43    | 14.5    |
| O15270  | SPTLC2       | 15       | 15       | 13.41    | 14.5    | Q9UPQ3  | AGAP1        | 15       | 15       | 13.41    | 14.5    | P78318  | IGBP1        | 15       | 15       | 13.41    | 14.5    |
| Q96P47  | AGAP3        | 8.31     | 15       | 13.41    | 12.2    | Q8WXX5  | DNAJC9       | 9.65     | 13.41    | 13.4     | 12.2    | Q29963  | HLA-C        | 15       | 15       | 13.4     | 14.5    |
| P30501  | HLA-C        | 14.87    | 11.89    | 13.4     | 13.4    | Q14139  | UBE4A        | 6.41     | 15       | 13.38    | 11.6    | Q9UHY7  | ENOPH1       | 15       | 13.55    | 13.39    | 14.0    |
| Q86VU6  | COMTD1       | 15       | 15       | 13.37    | 14.5    | O14981  | BTA1F        | 13.73    | 15       | 13.36    | 14.0    | O00264  | PGRCM1       | 15       | 15       | 13.36    | 14.5    |
| O00505  | STK25        | 15       | 15       | 13.34    | 14.4    | P51530  | DNA2         | 9.1      | 15       | 13.33    | 12.5    | O76024  | WFS1         | 15       | 15       | 13.33    | 14.4    |
| Q9Y3P9  | RABGAP1      | 15       | 15       | 13.32    | 14.4    | Q9H501  | ESF1         | 15       | 12.11    | 13.32    | 13.5    | O95757  | HSPA4L       | 11.69    | 12.96    | 13.32    | 12.7    |
| Q9NYA4  | MTMR4        | 15       | 5.85     | 13.32    | 11.4    | P50851  | LRBA         | 12.34    | 14.41    | 13.3     | 13.4    | O43156  | TTI1         | 15       | 15       | 13.3     | 14.4    |
| Q14137  | BOP1         | 15       | 15       | 13.29    | 14.4    | Q8TC07  | TBC1D15      | 10.74    | 10.76    | 13.29    | 11.6    | P46778  | RPL21        | 13.12    | 12.23    | 13.29    | 12.9    |
| Q6PTK2  | PMF1         | 15       | 15       | 13.27    | 14.4    | P0CC08  | GPR89B       | 14.89    | 15       | 13.25    | 14.4    | Q9BWW4  | SSBP3        | 9.41     | 14.09    | 13.26    | 12.3    |
| Q9BTX1  | TMEM48       | 15       | 15       | 13.23    | 14.4    | P51571  | SSR4         | 6        | 8.6      | 13.23    | 9.3     | Q6UWZ7  | FAM175A      | 9.8      | 12.82    | 13.23    | 12.0    |
| Q6ICG6  | KIAA0930     | 15       | 15       | 13.22    | 14.4    | Q3YEC7  | RABL6        | 5.07     | 5.12     | 13.2     | 7.8     | O60678  | PRMT3        | 9.22     | 15       | 13.22    | 12.5    |
| Q9H1K1  | ISCU         | 15       | 15       | 13.18    | 14.4    | Q92820  | GGH          | 11.86    | 13.76    | 13.16    | 12.9    | Q3SXM5  | HSDL1        | 13.34    | 15       | 13.18    | 13.8    |
| Q9BSJ5  | C17orf80     | 15       | 11.27    | 13.16    | 13.1    | P22830  | FECH         | 11.97    | 11.1     | 13.14    | 12.1    | Q71RC2  | LARP4        | 15       | 10.16    | 13.16    | 12.8    |
| P61077  | UBE2D3       | 15       | 15       | 13.13    | 14.4    | Q8NSV2  | NGEF         | 15       | 15       | 13.11    | 14.4    | P63172  | DYLNLT1      | 13.75    | 15       | 13.13    | 14.0    |
| P50542  | PEX5         | 15       | 15       | 13.1     | 14.4    | P54920  | NAPA         | 14.44    | 15       | 13.09    | 14.2    | Q14738  | PPP2R5D      | 15       | 15       | 13.09    | 14.4    |
| Q7Z4H7  | HAUS6        | 12.81    | 15       | 13.09    | 13.6    | Q8N9M5  | TMEM102      | 15       | 15       | 13.06    | 14.4    | Q99943  | AGPAT1       | 13.73    | 10.96    | 13.09    | 12.6    |
| Q96C46  | DUS3L        | 9.5      | 9.71     | 13.06    | 10.8    | Q92769  | HDAC2        | 12.68    | 15       | 13.04    | 13.6    | P21802  | GFGR2        | 15       | 15       | 13.04    | 14.3    |
| Q99996  | AKAP9        | 15       | 15       | 13.03    | 14.3    | Q8WUM0  | NUP133       | 8.11     | 11.28    | 13.02    | 10.8    | P42694  | HELZ         | 15       | 15       | 13.02    | 14.3    |
| Q961V0  | NGLY1        | 15       | 15       | 13       | 14.3    | Q9H2M9  | RAB3GAP2     | 8.05     | 15       | 12.98    | 12.0    | Q95400  | CD2BP2       | 13.9     | 15       | 13       | 14.0    |
| Q9Y6D5  | ARFGEF2      | 15       | 12.66    | 12.98    | 13.5    | O15613  | PKN2         | 14.8     | 15       | 12.97    | 14.3    | O95070  | YIF1A        | 8.06     | 9.21     | 12.98    | 10.1    |
| Q6P2E9  | EDC4         | 12.59    | 15       | 12.96    | 13.5    | Q9UBK7  | RABL2A       | 15       | 10.57    | 12.96    | 12.8    | P21912  | SDHB         | 12.38    | 11.48    | 12.96    | 12.3    |
| P00374  | DHFR         | 11.37    | 10.46    | 12.96    | 11.6    | Q9B327  | RICTOR       | 15       | 7.95     | 12.93    | 12.0    | O15372  | EIF3H        | 15       | 15       | 12.93    | 14.3    |
| Q7Z6M4  | MTERFD2      | 15       | 15       | 12.91    | 14.3    | Q53S58  | TMEM177      | 15       | 15       | 12.89    | 14.3    | P50402  | EMD          | 15       | 15       | 12.91    | 14.3    |
| Q9Y4C0  | KDM3A        | 9.23     | 14.84    | 12.89    | 12.3    | Q14331  | FRG1         | 15       | 8.8      | 12.88    | 12.2    | P46063  | RECQL        | 13.7     | 11.33    | 12.89    | 12.6    |
| Q2TBE1  | CWF19L2      | 12.43    | 12.32    | 12.87    | 12.5    | Q9UL03  | INTS6        | 12.07    | 15       | 12.86    | 13.3    | Q9HBE1  | PATZ1        | 15       | 15       | 12.86    | 14.3    |
| P49419  | ALDH7A1      | 10.72    | 11.22    | 12.86    | 11.6    | Q9HCD6  | TANC2        | 4.39     | 10.51    | 12.85    | 9.3     | Q9COE2  | XPO4         | 13.54    | 15       | 12.85    | 13.8    |
| Q96EV2  | RBM33        | 15       | 15       | 12.84    | 14.3    | Q99986  | VRK1         | 10.45    | 12.52    | 12.84    | 11.9    | P51825  | AFF1         | 15       | 15       | 12.84    | 14.3    |
| Q92598  | HSPH1        | 12.26    | 15       | 12.83    | 13.4    | P63000  | RAC1         | 11.77    | 9.21     | 12.8     | 11.3    | Q4G0F5  | VPS26B       | 15       | 8.15     | 12.83    | 12.0    |
| P10321  | HLA-C        | 14.87    | 15       | 12.79    | 14.2    | P30460  | HLA-B        | 14.81    | 12.7     | 12.79    | 13.4    | Q86SX3  | C14orf80     | 10.63    | 13.84    | 12.79    | 12.4    |
| Q9UJ41  | RABGEF1      | 15       | 8.54     | 12.78    | 12.1    | Q75QN2  | INTS8        | 15       | 15       | 12.77    | 14.3    | Q96EC8  | YIPF6        | 15       | 15       | 12.77    | 14.3    |
| P49915  | GMPS         | 12.33    | 15       | 12.77    | 13.4    | P62263  | RPS14        | 13.61    | 13.76    | 12.77    | 13.4    | Q8NFF5  | FLAD1        | 15       | 14.83    | 12.77    | 14.2    |
| P32321  | DCTD         | 15       | 15       | 12.76    | 14.3    | Q6NXT6  | TAPT1        | 6.28     | 7.55     | 12.76    | 8.9     | Q9NSV4  | DIAPH3       | 14.74    | 14.36    | 12.76    | 14.0    |
| Q13643  | FHL3         | 15       | 12.57    | 12.74    | 13.4    | Q9HBU6  | ETNK1        | 12.57    |          |          |         |         |              |          |          |          |         |

| uniprot | protein name   | ratio#01 | ratio#02 | ratio#03 | average | uniprot | protein name     | ratio#01 | ratio#02 | ratio#03 | average | uniprot | protein name | ratio#01 | ratio#02 | ratio#03 | average |
|---------|----------------|----------|----------|----------|---------|---------|------------------|----------|----------|----------|---------|---------|--------------|----------|----------|----------|---------|
| O15084  | ANKRD28        | 15       | 9.42     | 12.2     | 12.2    | Q9H3C7  | GNBPN2           | 15       | 15       | 12.18    | 14.1    | Q06203  | PPAT         | 10.5     | 15       | 12.19    | 12.6    |
| P28799  | GRN            | 15       | 15       | 12.18    | 14.1    | Q9NT62  | ATG3             | 10.59    | 11.72    | 12.18    | 11.5    | Q9NUJ1  | ABHD10       | 4.51     | 15       | 12.18    | 10.6    |
| Q9Y6X3  | MAU2           | 15       | 15       | 12.17    | 14.1    | Q9NUJ7  | DDX19A           | 6.14     | 7.68     | 12.15    | 8.7     | Q8NF37  | LPCAT1       | 15       | 15       | 12.16    | 14.1    |
| P07858  | CTSB           | 15       | 15       | 12.14    | 14.0    | Q9NZN8  | CNOT2            | 15       | 15       | 12.13    | 14.0    | P51648  | ALDH3A2      | 15       | 15       | 12.14    | 14.0    |
| Q9P0P0  | RNF181         | 15       | 13.21    | 12.13    | 13.4    | Q9NVY4  | CDK12            | 11.71    | 15       | 12.11    | 12.9    | P35610  | SOAT1        | 15       | 8.75     | 12.13    | 12.0    |
| Q9Y5B8  | NME7           | 10.01    | 7.36     | 12.11    | 9.8     | Q99829  | CPNIE1           | 15       | 14.93    | 12.1     | 14.0    | Q01780  | EXOSC10      | 10.57    | 7.02     | 12.11    | 9.9     |
| Q94855  | SEC24D         | 12.25    | 15       | 12.09    | 13.1    | Q13596  | SNX1             | 10.29    | 11.18    | 12.08    | 11.2    | Q9Y613  | FHOD1        | 9.84     | 15       | 12.08    | 12.3    |
| Q9UFC0  | LRWD1          | 15       | 15       | 12.07    | 14.0    | Q86VR2  | FAM134C          | 15       | 14.71    | 12.07    | 13.9    | P54198  | HIRA         | 11.28    | 15       | 12.07    | 12.8    |
| Q9Y620  | RAD54B         | 10.72    | 13.51    | 12.05    | 12.1    | Q96159  | NARS2            | 15       | 13.36    | 12.04    | 13.5    | Q9NXE4  | SMPD4        | 13.8     | 15       | 12.04    | 13.6    |
| Q86XP1  | DGKH           | 10.75    | 15       | 12.03    | 12.6    | Q9UNM6  | PSMD13           | 14.49    | 11.5     | 12.03    | 12.7    | Q9BR76  | CORO1B       | 6.01     | 13.01    | 12.03    | 10.4    |
| Q5PRF9  | SAMD4B         | 15       | 15       | 12.02    | 14.0    | Q75925  | PIAS1            | 15       | 15       | 12.02    | 14.0    | Q8NBX0  | SCCPDH       | 15       | 15       | 12.02    | 14.0    |
| Q6ULP2  | AFTPH          | 15       | 15       | 12       | 14.0    | P17987  | TCP1             | 12.1     | 13.83    | 12       | 12.6    | P31949  | S100A11      | 15       | 15       | 12       | 14.0    |
| O43396  | TXNL1          | 15       | 15       | 11.99    | 14.0    | P30260  | CDC27            | 15       | 11.98    | 11.98    | 13.0    | P53004  | BLVRA        | 15       | 15       | 11.99    | 14.0    |
| P28161  | GSTM2          | 5.04     | 10.6     | 11.98    | 9.2     | Q68DK2  | ZFYVE26          | 15       | 4.87     | 11.96    | 10.6    | Q9Y3R5  | DOPEY2       | 14.22    | 15       | 11.96    | 13.7    |
| Q9NUJ0  | ZDHC18         | 15       | 15       | 11.95    | 14.0    | Q94906  | PRPF6            | 12.27    | 11.72    | 11.94    | 12.0    | Q9UJW6  | SATB2        | 10.46    | 6.96     | 11.95    | 9.8     |
| Q8NC51  | SERBP1         | 11.8     | 15       | 11.92    | 12.9    | Q01484  | ANK2             | 11.18    | 15       | 11.89    | 12.7    | Q8NV33  | WDSUB1       | 9.94     | 15       | 11.9     | 12.3    |
| P62701  | RPS4X          | 11.2     | 14.3     | 11.88    | 12.5    | Q75882  | ATRN             | 15       | 15       | 11.82    | 13.9    | Q9NYK5  | MRPL39       | 9.39     | 5.65     | 11.84    | 9.0     |
| Q5HY18  | RABL3          | 15       | 15       | 11.82    | 13.9    | Q9BV68  | RNF126           | 6.71     | 7.8      | 11.82    | 8.8     | Q9UL63  | MKLN1        | 15       | 11.64    | 11.82    | 12.8    |
| P55039  | DRG2           | 15       | 15       | 11.8     | 13.9    | Q92530  | PSMF1            | 9.69     | 15       | 11.79    | 12.2    | Q5JTW2  | CEP78        | 15       | 15       | 11.8     | 13.9    |
| P46781  | RPS9           | 12.6     | 13.68    | 11.78    | 12.7    | Q7KZ9N  | COX15            | 15       | 15       | 11.77    | 13.9    | Q8N3C0  | ASC33        | 15       | 7.33     | 11.78    | 11.4    |
| Q17670  | DGKD           | 15       | 15       | 11.77    | 13.9    | Q9NVR5  | DNAAF2           | 15       | 15       | 11.75    | 13.9    | Q43395  | PRPF3        | 12.53    | 15       | 11.77    | 13.1    |
| Q9UJX3  | ANAPC7         | 13.77    | 12.81    | 11.75    | 12.8    | Q9UBB9  | TFIP11           | 15       | 15       | 11.73    | 13.9    | Q9Y3L5  | RAP2C        | 15       | 7.65     | 11.75    | 11.5    |
| P47974  | ZFP36L2        | 15       | 15       | 11.73    | 13.9    | Q14258  | TRIM25           | 15       | 15       | 11.72    | 13.9    | Q95819  | MAP4K4       | 15       | 9.87     | 11.73    | 12.2    |
| Q94966  | USP19          | 8.28     | 15       | 11.72    | 11.7    | Q9UJY9  | DDX41            | 9.02     | 5.88     | 11.71    | 8.9     | Q7Z3T8  | ZFYVE16      | 12.32    | 15       | 11.71    | 13.0    |
| O43143  | DHX15          | 9.94     | 13.04    | 11.7     | 11.6    | P62851  | RPS25            | 11.59    | 15       | 11.68    | 12.8    | P31749  | AKT1         | 15       | 15       | 11.69    | 13.9    |
| Q965B8  | SMC6           | 10.84    | 14.8     | 11.68    | 12.4    | Q7RTV0  | PHF5A            | 15       | 15       | 11.66    | 13.9    | Q9H0K1  | SIK2         | 15       | 15       | 11.67    | 13.9    |
| Q8N556  | AFAP1          | 15       | 15       | 11.66    | 13.9    | P04632  | CAPNS1           | 9.19     | 4.96     | 11.66    | 8.6     | Q96CQ5  | C16orf58     | 8.06     | 11.59    | 11.66    | 10.4    |
| O43172  | PRPF4          | 9.85     | 15       | 11.65    | 12.2    | Q96124  | FUBP3            | 11.2     | 12.12    | 11.63    | 11.7    | Q15007  | WTAP         | 15       | 15       | 11.64    | 13.9    |
| Q53R41  | FASTKD1        | 15       | 15       | 11.62    | 13.9    | Q92604  | lidyglycerol acy | 15       | 15       | 11.62    | 13.9    | Q969F1  | GTFC6        | 15       | 15       | 11.62    | 13.9    |
| Q9NZL4  | HSPBP1         | 12.38    | 15       | 11.61    | 13.0    | O00443  | PIK3C2A          | 13.27    | 11.7     | 11.6     | 12.2    | O75822  | EIF3J        | 9.12     | 15       | 11.61    | 11.9    |
| Q96HA7  | TONS1          | 12.57    | 15       | 11.59    | 13.1    | Q6N0K1  | SLC25A24         | 11.42    | 10.68    | 11.58    | 11.2    | Q69YQ0  | SPECC1L      | 11.31    | 15       | 11.58    | 12.6    |
| O15173  | PGRMC2         | 14.17    | 14.31    | 11.57    | 13.4    | Q9H0C5  | BTBD1            | 15       | 15       | 11.55    | 13.9    | P18858  | LIG1         | 12.37    | 14.82    | 11.56    | 12.9    |
| Q9C091  | GREB1L         | 15       | 15       | 11.54    | 13.8    | Q15040  | JDSD1            | 15       | 7.93     | 11.51    | 11.5    | Q96T76  | MMS19        | 15       | 8.69     | 11.51    | 11.7    |
| Q8N6T3  | ARFGAP1        | 9.05     | 13.93    | 11.5     | 11.5    | P23588  | EIF4B            | 11.47    | 11.9     | 11.5     | 11.6    | O00165  | HAX1         | 13.48    | 13.45    | 11.5     | 12.8    |
| Q9BSL1  | UBAC1          | 11.47    | 6.05     | 11.5     | 9.7     | P12277  | CKB              | 11.3     | 11.9     | 11.44    | 11.5    | P60709  | ACTB         | 10.68    | 11.27    | 11.47    | 11.1    |
| P55060  | CSE1L          | 11.23    | 11.75    | 11.44    | 11.5    | Q7L2H7  | EIF3M            | 12.8     | 15       | 11.4     | 13.1    | P09132  | SRP19        | 13.04    | 15       | 11.4     | 13.1    |
| E7ERL9  | VARS2          | 14.55    | 9.54     | 11.4     | 11.8    | Q8N4C6  | NIN              | 15       | 15       | 11.39    | 13.8    | Q9HC36  | RNMTL1       | 8.35     | 8.09     | 11.4     | 9.3     |
| F5H5P7  | Incharacterize | 11.52    | 15       | 11.39    | 12.6    | P01889  | HLA-B            | 14.74    | 12.7     | 11.39    | 12.9    | P12694  | BCKDHA       | 11.52    | 15       | 11.39    | 12.6    |
| Q96GQ2  | DDX27          | 12.45    | 12.54    | 11.38    | 12.1    | Q8N122  | RPTOR            | 15       | 15       | 11.37    | 13.8    | Q96GW9  | MARS2        | 7.41     | 12.22    | 11.38    | 10.3    |
| Q8IWB7  | WDFY1          | 7.95     | 15       | 11.37    | 11.4    | Q96AG3  | SLC25A46         | 15       | 15       | 11.36    | 13.8    | P50213  | IDH3A        | 15       | 11.6     | 11.37    | 12.7    |
| O43303  | CCP110         | 15       | 15       | 11.36    | 13.8    | Q96BM9  | ARL8A            | 15       | 15       | 11.34    | 13.8    | Q9Y485  | DMXL1        | 15       | 13.67    | 11.35    | 13.3    |
| Q9NZN5  | ARHGEF12       | 15       | 15       | 11.31    | 13.8    | Q8NBP0  | TTC13            | 14.86    | 15       | 11.31    | 13.7    | O14972  | DSCR3        | 15       | 15       | 11.31    | 13.8    |
| Q8N4J0  | C9orf41        | 11.88    | 15       | 11.31    | 12.7    | Q8WVY3  | PRPF31           | 6.17     | 5.7      | 11.3     | 7.7     | Q8IWI3  | BRSK2        | 15       | 13.14    | 11.3     | 13.1    |
| O43683  | BUB1           | 15       | 15       | 11.28    | 13.8    | P11413  | G6PD             | 10.87    | 12.12    | 11.28    | 11.4    | P29218  | IMPA1        | 14.25    | 15       | 11.28    | 13.5    |
| Q8X101  | SUGP2          | 8.27     | 10.44    | 11.28    | 10.0    | Q9Y312  | AAR2             | 15       | 11.6     | 11.25    | 12.6    | P22607  | FGFR3        | 15       | 15       | 11.27    | 13.8    |
| Q8P1J9  | CDC73          | 9.5      | 9.43     | 11.25    | 10.1    | Q8I281  | ELMOD2           | 15       | 15       | 11.22    | 13.7    | O75427  | LRCH4        | 15       | 15       | 11.24    | 13.7    |
| Q9HBH5  | RDH14          | 12.78    | 15       | 11.22    | 13.0    | Q96JG8  | MAGED4B          | 15       | 15       | 11.21    | 13.7    | Q9Y221  | NIP7         | 15       | 15       | 11.21    | 13.7    |
| O15014  | ZNF609         | 15       | 15       | 11.21    | 13.7    | Q96LR5  | UBE2E2           | 8.28     | 15       | 11.21    | 11.5    | Q14653  | IRF3         | 15       | 15       | 11.21    | 13.7    |
| Q9Y394  | DHR57          | 11.97    | 10.32    | 11.21    | 11.2    | Q9Y2L9  | LROH1            | 15       | 13.38    | 11.19    | 13.2    | Q9H892  | TTC12        | 10.05    | 15       | 11.2     | 12.1    |
| O60427  | FADS1          | 6.4      | 9.84     | 11.19    | 9.1     | Q8IXQ5  | KLHL7            | 15       | 15       | 11.16    | 13.7    | Q12769  | NUP160       | 8.12     | 8.68     | 11.19    | 9.3     |
| Q9NV33  | SLC38A7        | 15       | 15       | 11.16    | 13.7    | Q9Y217  | MTMR6            | 9.98     | 15       | 11.15    | 12.0    | Q9P1Y5  | CAMSAP3      | 13.8     | 10.47    | 11.16    | 11.8    |
| O43488  | AKR7A2         | 8.88     | 15       | 11.15    | 11.7    | Q7L3T8  | PARS2            | 12.55    | 15       | 11.14    | 12.9    | Q8WV01  | TSEN15       | 15       | 15       | 11.14    | 13.7    |
| Q14687  | GSE1           | 15       | 15       | 11.13    | 13.7    | Q8TF05  | PPP4R1           | 15       | 15       | 11.13    | 13.7    | Q9P2B4  | CTTNBP2NL    | 15       | 15       | 11.13    | 13.7    |
| Q9P253  | VPS18          | 14.07    | 14.86    | 11.13    | 13.4    | Q86YQ8  | CNPE8            | 6.33     | 7.96     | 11.09    | 8.5     | Q16537  | PPP2R5E      | 15       | 15       | 11.11    | 13.7    |
| Q13057  | COASY          | 15       | 9.71     | 11.08    | 11.9    | Q9BZ17  | UPF3B            | 15       | 15       | 11.06    | 13.7    | P62937  | PIIA         | 11.57    | 13.19    | 11.07    | 11.9    |
| Q92643  | PIGK           | 15       | 15       | 11.06    | 13.7    | Q9UPW5  | AGTPBP1          | 15       | 13.52    | 11.05    | 13.2    | Q9H18   | ASCC2        | 15       | 15       | 11.06    | 13.7    |
| Q9Y2Q3  | GSTK1          | 15       | 15       | 11.04    | 13.7    | Q02338  | BDH1             | 8.59     | 15       | 11.04    | 11.5    | Q9NTJ5  | SACM1L       | 9.56     | 15       | 11.04    | 11.9    |
| Q13144  | EIF2B5         | 5.33     | 12.57    | 11.04    | 9.6     | O14787  | TNPO2            | 12.45    | 15       | 11.02    | 12.8    | Q86U58  | SMG6         | 4.98     | 12.02    | 11.04    | 9.3     |
| Q8NF99  | ZNF397         | 4.11     | 15       | 11.01    | 10.0    | Q9GZM8  | NDEL1            | 10.72    | 15       | 11       | 12.2    | Q6IQ22  | RAB12        | 11.08    | 14.94    | 11.01    | 12.3    |
| Q9G279  | EGLN1          | 12.62    | 14.53    | 11       | 12.7    | O00505  | KPNA3            | 10.28    | 15       | 10.99    | 12.1    | P32322  | PYCR1        | 15       | 15       | 10.99    | 13.7    |
| Q4G116  | ACSF3          | 15       | 8.57     | 10.98    | 11.5    | O43592  | XPO7             | 10.89    | 14.73    | 10.97    | 12.2    | Q8N137  | PTC7         | 15       | 15       | 10.97    | 13.7    |
| Q00VDF  | HSPA14         | 11.32    | 15       | 10.95    | 12.4    | Q6S8J3  | POTEE            | 9.88     | 9.73     | 10.95    | 10.2    | Q9H521  | DHX35        | 4.47     | 11.77    | 10.95    | 9.1     |
| A2RTX5  | TARSL2         | 15       | 15       | 10.94    | 13.6    | Q9H9A6  | LRRC40           | 14.24    | 11.78    | 10.94    | 12.3    | Q96HR9  | REEP6        | 15       | 15       | 10.94    | 13.6    |
| Q9H900  | ZWILCH         | 10.64    | 15       | 10.92    | 12.2    | Q9H1A4  | ANAPC1           | 15       | 15       | 10.91    | 13.6    | O60684  | KPNA6        | 13.2     | 7.62     | 10.92    | 10.6    |
| P08651  | NFIC           | 10.78    | 15       | 10.91    | 12.2    | Q2M218  | AAK1             | 12.72    | 8.99     | 10.9     | 10.9    | P54687  | BCAT1        | 15       | 14.57    | 10.91    | 13.5    |
| O75122  | CLASP2         | 8.33     | 7.54     | 10.9     | 8.9     | Q9BUB4  | ADAT1            | 15       | 11.65    | 10.89    | 12.5    | P16854  | DGUOK        | 15       | 15       | 10.89    | 13.6    |
| Q9NNW5  | WDR6           | 6.59     | 6.13     | 10.86    | 7.9     | O00159  | MYO1C            | 10.08    | 15       | 10.85    | 12.0    | Q9Y448  | SKAP         | 14.32    | 15       | 10.85    | 13.4    |
| Q8WYV5  | AHCTF1         | 5.62     | 8.2      | 10.85    | 8.2     | Q8ND24  | RNF214           | 12.37    | 15       | 10.84    | 12.7    | P22307  | SCP2         | 4.9      | 4.87     | 10.85    | 6.9     |
| Q86UQ7  | ZNF598         | 7.09     | 15       | 10.84    | 11.0    | Q8IWF6  | FAM116A          | 15       | 9.88     | 10.84    | 11.9    | O75534  | CSD1         | 10.04    | 11.34    | 10.84    | 10.7    |
| Q9UIV1  | CNOT7          | 9.53     | 8.03     | 10.84    | 9.5     | P28328  | PEX2             | 15       | 15       | 10.83    | 13.6    | Q9UJF2  | RASAL2       | 15       | 15       | 10.83    | 13.6    |
| O15357  | INPPL1         | 10.87    | 9.04     | 10.83    | 10.2    | Q9P2E9  | RBP1             | 8.44     | 7.05     | 10.82    | 8.8     | Q8NG11  | TSPAN14      | 15       | 8.57     | 10.83    | 11.5    |
| Q9UNF1  | MAGED2         | 11.51    | 11.73    | 10.81    | 11.4    | Q9NZC9  | SMARCAL1         | 15       | 9.68     | 10.8     | 11.8    | Q9Y5V3  | MAGED1       | 11       | 11.54    | 10.8     | 11.1    |
| Q9Y5B0  | CTDP1          | 15       | 15       | 10.79    | 13.6    | Q14694  | USP10            | 11.32    | 14.75    | 10.78    | 12.3    | Q9NZM4  | GLTSCR1      | 5.27     | 15       | 10.78    | 10.4    |
| A6NH77  | UNC119B        | 9.       |          |          |         |         |                  |          |          |          |         |         |              |          |          |          |         |

| uniprot | protein name | ratio#01 | ratio#02 | ratio#03 | average | uniprot | protein name | ratio#01 | ratio#02 | ratio#03 | average | uniprot | protein name | ratio#01 | ratio#02 | ratio#03 | average |
|---------|--------------|----------|----------|----------|---------|---------|--------------|----------|----------|----------|---------|---------|--------------|----------|----------|----------|---------|
| P56945  | BCAR1        | 15       | 15       | 10.32    | 13.4    | Q8IWX8  | CHERP        | 13.83    | 10.41    | 10.32    | 11.5    | O60313  | OPA1         | 11.82    | 13.73    | 10.32    | 12.0    |
| Q68D91  | MBLAC2       | 9.89     | 13.7     | 10.31    | 11.3    | P08237  | PFKM         | 9.21     | 9.14     | 10.31    | 9.6     | Q9P2W1  | PSMC3IP      | 10.08    | 9.66     | 10.31    | 10.0    |
| Q96CD0  | FBXL8        | 15       | 5.08     | 10.3     | 10.1    | P49756  | RBM25        | 9.83     | 7.1      | 10.29    | 9.1     | Q9NQ4R  | NIF2         | 6.58     | 15       | 10.29    | 10.6    |
| P49721  | PSMB2        | 15       | 14.25    | 10.26    | 13.2    | Q96DX4  | RSPRY1       | 15       | 15       | 10.25    | 13.4    | Q99700  | ATXN2        | 5.82     | 5.63     | 10.26    | 7.2     |
| Q9BUJ4  | POLR3C       | 12.16    | 14.5     | 10.24    | 12.3    | Q9BW71  | HIRIP3       | 10.39    | 13.17    | 10.22    | 11.3    | Q8N5J2  | FAM63A       | 15       | 15       | 10.22    | 13.4    |
| Q4VC55  | AMOT         | 10.74    | 13.4     | 10.21    | 11.5    | F8VZB9  | HLC-A        | 8.7      | 15       | 10.2     | 11.3    | Q9Y450  | HBS1L        | 6.38     | 9.38     | 10.21    | 8.7     |
| Q93009  | USP7         | 11.84    | 13.03    | 10.19    | 11.7    | O00442  | RTCA         | 5.93     | 6.08     | 10.18    | 7.4     | Q86YV9  | HPS6         | 4.63     | 11.4     | 10.18    | 8.7     |
| Q9NPH2  | ISYNA1       | 15       | 15       | 10.17    | 13.4    | Q16181  | 7-Sep        | 7.83     | 5.34     | 10.16    | 7.8     | Q9NXR7  | BRE          | 15       | 15       | 10.16    | 13.4    |
| P07910  | HNRNPC       | 5.04     | 5.92     | 10.15    | 7.0     | Q70CQ2  | USP34        | 11.45    | 13.96    | 10.14    | 11.9    | O75962  | TRIO         | 15       | 15       | 10.14    | 13.4    |
| O15305  | PMM2         | 15       | 15       | 10.13    | 13.4    | Q08999  | RBL2         | 10       | 10.4     | 10.1     | 10.2    | Q9Y5J1  | UTP18        | 12.63    | 15       | 10.12    | 12.6    |
| Q9H9E3  | COG4         | 15       | 15       | 10.09    | 13.4    | P46977  | STT3A        | 10.84    | 14.74    | 10.09    | 11.9    | Q7Z6E9  | RBBP6        | 7.82     | 15       | 10.09    | 11.0    |
| P12931  | SRC          | 15       | 15       | 10.08    | 13.4    | P25208  | NFYB         | 15       | 12.41    | 10.08    | 12.5    | Q9BQ70  | TCF25        | 9.86     | 15       | 10.08    | 11.6    |
| Q9NVM4  | PRMT7        | 15       | 7.37     | 10.07    | 10.8    | Q9BPX6  | MICU1        | 15       | 15       | 10.04    | 13.3    | O00743  | PPP6C        | 15       | 14.58    | 10.06    | 13.2    |
| Q8IV38  | ANKMY2       | 15       | 15       | 10.04    | 13.3    | Q9UPM8  | AP4E1        | 15       | 7.05     | 10.03    | 10.7    | Q9BVN2  | RUSC1        | 15       | 12.07    | 10.04    | 12.4    |
| P13693  | TPT1         | 5.3      | 6.75     | 10.03    | 7.4     | Q8NCD3  | HJURP        | 15       | 15       | 10.02    | 13.3    | Q15751  | HERC1        | 6.58     | 5.77     | 10.03    | 7.5     |
| Q9H6S1  | AZ12         | 15       | 15       | 10.02    | 13.3    | Q96JM3  | CHAMP1       | 15       | 9.31     | 10.02    | 11.4    | P30153  | PPP2R1A      | 9.6      | 10.54    | 10.02    | 10.1    |
| Q92558  | WASF1        | 15       | 7.79     | 10.02    | 10.9    | Q7Z4G4  | TRMT11       | 15       | 6.35     | 10.01    | 10.5    | Q969R5  | L3MBTL2      | 5.45     | 13.83    | 10.01    | 9.8     |
| P54886  | ALDH18A1     | 9.08     | 9.7      | 10       | 9.6     | Q16880  | UGT8         | 7.04     | 15       | 9.99     | 10.7    | Q5VUJ6  | LRCH2        | 15       | 15       | 9.99     | 13.3    |
| Q13823  | GNL2         | 6.93     | 12.86    | 9.98     | 9.9     | P46779  | RPL28        | 7.62     | 10.37    | 9.98     | 9.3     | P85037  | FOXK1        | 5.28     | 10.95    | 9.98     | 8.7     |
| Q9UNK0  | STX8         | 4.61     | 8.7      | 9.98     | 7.8     | Q8IY81  | FTSJ3        | 11.23    | 15       | 9.96     | 12.1    | Q9BY41  | HDAC8        | 15       | 15       | 9.96     | 13.3    |
| O14654  | IRS4         | 8.89     | 10.84    | 9.96     | 9.9     | P46926  | GNPDA1       | 5.21     | 8.21     | 9.95     | 7.8     | Q5T5U3  | ARHGAP21     | 15       | 10.91    | 9.95     | 12.0    |
| P33121  | ACSL1        | 7.55     | 7.47     | 9.94     | 8.3     | Q96H10  | SENP5        | 15       | 15       | 9.93     | 13.3    | P31260  | HAUS1        | 15       | 15       | 9.93     | 13.3    |
| Q9HAU4  | SMURF2       | 10.9     | 12.5     | 9.93     | 11.1    | O15397  | IPO8         | 15       | 10.04    | 9.89     | 11.6    | Q9Y575  | ASB3         | 15       | 15       | 9.89     | 13.3    |
| Q3B7T1  | EDRF1        | 15       | 6.68     | 9.89     | 10.5    | Q8TB52  | FBXO30       | 14.84    | 12.59    | 9.88     | 12.4    | Q86V48  | LUZP1        | 12.88    | 15       | 9.88     | 12.6    |
| P49589  | CARS         | 7.92     | 14.93    | 9.87     | 10.9    | O75600  | GCAT         | 15       | 15       | 9.86     | 13.3    | P61225  | RAP2B        | 13.43    | 4.13     | 9.87     | 9.1     |
| Q7Z222  | EFTUD1       | 13.29    | 15       | 9.86     | 12.7    | Q17R89  | ARHGAP44     | 15       | 15       | 9.85     | 13.3    | Q99570  | PIK3R4       | 15       | 9.29     | 9.86     | 11.4    |
| O94991  | SLITRK5      | 7.04     | 15       | 9.85     | 10.6    | P07948  | LYN          | 8.35     | 7.99     | 9.82     | 8.7     | Q9Y324  | FCF1         | 11.3     | 8.24     | 9.84     | 9.8     |
| Q6AI08  | HEATR6       | 11.18    | 15       | 9.81     | 12.0    | Q09161  | NCBP1        | 4.82     | 6.04     | 9.81     | 6.9     | P51148  | RAB5C        | 12.01    | 14.78    | 9.81     | 12.2    |
| P20618  | PSMB1        | 9.99     | 15       | 9.8      | 11.6    | O60291  | MGRN1        | 15       | 12.15    | 9.78     | 12.3    | P00390  | GSR          | 7.12     | 12.62    | 9.78     | 9.8     |
| Q96S22  | IWS1         | 10.31    | 7.47     | 9.78     | 9.2     | P61619  | SEC61A1      | 11.44    | 12.44    | 9.75     | 11.2    | Q96FV9  | THOC1        | 10.26    | 10.24    | 9.77     | 10.1    |
| Q9H9S3  | SEC61A2      | 11.73    | 12.04    | 9.75     | 11.2    | Q9H7C9  | C11orf67     | 5.15     | 7.46     | 9.74     | 7.5     | Q9H582  | ZNF644       | 9.9      | 11.33    | 9.75     | 10.3    |
| Q99032  | MARK1        | 15       | 15       | 9.73     | 13.2    | Q9Y296  | TRAPP4       | 15       | 15       | 9.71     | 13.2    | Q14444  | CAPRIN1      | 15       | 6.33     | 9.72     | 10.3    |
| Q7Z6J0  | SH3RF1       | 15       | 15       | 9.71     | 13.2    | Q9UKU7  | ACAD8        | 4.83     | 15       | 9.71     | 9.8     | Q8TBZ6  | TRMT10A      | 15       | 15       | 9.71     | 13.2    |
| Q9Y4K3  | TRAF6        | 15       | 15       | 9.7      | 13.2    | Q13547  | HDAC1        | 12.16    | 14.2     | 9.66     | 12.0    | Q8NB46  | ANKRD52      | 11.84    | 6.86     | 9.67     | 9.5     |
| Q8WVD3  | RNF138       | 13.48    | 11.91    | 9.65     | 11.7    | Q6WKZ4  | RAB11FIP1    | 15       | 15       | 9.64     | 13.2    | Q96EY7  | PTCD3        | 10.3     | 5.58     | 9.65     | 8.5     |
| Q6L8Q7  | PDE12        | 6.53     | 12.88    | 9.64     | 9.7     | O60488  | ACSL4        | 11.2     | 11.06    | 9.63     | 10.6    | Q9BZJ4  | SLC25A39     | 15       | 4.59     | 9.64     | 9.7     |
| O95573  | ACSL3        | 10.88    | 9.93     | 9.63     | 10.1    | Q8N2K1  | UBE2J2       | 15       | 15       | 9.62     | 13.2    | Q06265  | EXOSC9       | 15       | 15       | 9.62     | 13.2    |
| O00425  | IGF2BP3      | 14.38    | 15       | 9.62     | 13.0    | Q8ND56  | LSM14A       | 10.63    | 15       | 9.62     | 11.8    | Q7L266  | ASRGL1       | 11.75    | 15       | 9.62     | 12.1    |
| O14561  | NDUFAB1      | 14.93    | 10.43    | 9.62     | 11.7    | Q8TEW0  | PARD3        | 9.68     | 4.14     | 9.62     | 7.8     | Q96CS2  | HAUS1        | 15       | 8.25     | 9.62     | 11.0    |
| Q9C0B7  | TMC07        | 15       | 15       | 9.61     | 13.2    | Q9H981  | ACTR8        | 10.8     | 15       | 9.61     | 11.8    | P24468  | NR2F2        | 15       | 15       | 9.61     | 13.2    |
| B7ZAP0  | RABGAP1L     | 15       | 10.03    | 9.61     | 11.5    | Q03701  | CEBPZ        | 10.67    | 15       | 9.6      | 11.8    | Q96SB3  | PPP1R9B      | 15       | 15       | 9.6      | 13.2    |
| Q7Z7H5  | TMED4        | 8.37     | 15       | 9.6      | 11.0    | Q96RK4  | BBS4         | 7.53     | 15       | 9.59     | 10.7    | Q9NP92  | MRPS30       | 12.97    | 6.47     | 9.6      | 9.7     |
| P04899  | GNAI2        | 8.68     | 8.89     | 9.59     | 9.1     | Q5VSL9  | FAM40A       | 12.2     | 15       | 9.57     | 12.3    | Q92973  | TNPO1        | 11.73    | 11.75    | 9.58     | 11.0    |
| Q96151  | WBSCR16      | 15       | 15       | 9.56     | 13.2    | Q9NU22  | MDN1         | 9.42     | 11.04    | 9.55     | 10.0    | O00148  | DDX39A       | 9.86     | 12.79    | 9.55     | 10.7    |
| P13489  | RNH1         | 9.91     | 8.03     | 9.55     | 9.2     | O5VZL5  | ZMYM4        | 6.58     | 12.4     | 9.53     | 9.5     | Q9BQ15  | NABP2        | 14.6     | 15       | 9.53     | 13.0    |
| Q15021  | NCAPD2       | 9.27     | 10.84    | 9.53     | 9.9     | Q9NX58  | LYAR         | 4.52     | 7.12     | 9.52     | 7.1     | P45974  | USP5         | 13.27    | 10.98    | 9.52     | 11.3    |
| Q14151  | SAFB2        | 7.11     | 15       | 9.51     | 10.5    | Q9H773  | DCTPP1       | 10.01    | 6.06     | 9.5      | 8.5     | P23258  | TUBG1        | 10.56    | 6.45     | 9.5      | 8.8     |
| Q96CM8  | ACSF2        | 7.59     | 15       | 9.49     | 10.7    | Q96J17  | SPG11        | 15       | 15       | 9.47     | 13.2    | O15228  | GNPAT        | 15       | 11.41    | 9.48     | 12.0    |
| P07947  | YES1         | 7.81     | 12.5     | 9.47     | 9.9     | Q96HC4  | PDLIM5       | 5.14     | 11.31    | 9.46     | 8.6     | Q99575  | POP1         | 6.03     | 9.12     | 9.47     | 8.2     |
| Q6NXT1  | ANKRD54      | 15       | 7.24     | 9.46     | 10.6    | Q9NPQ8  | RIC8A        | 7.46     | 9.4      | 9.45     | 8.8     | Q9NWX8  | PAG1         | 15       | 12.32    | 9.45     | 12.3    |
| Q9BWU0  | SLC4A1AP     | 11.35    | 15       | 9.44     | 11.9    | Q05682  | CALD1        | 9.83     | 8.24     | 9.44     | 9.2     | O60287  | URB1         | 9.07     | 15       | 9.44     | 11.2    |
| Q5H9R7  | PPP6R3       | 15       | 7.25     | 9.44     | 10.6    | Q6P158  | DHX57        | 7.95     | 6.86     | 9.43     | 8.1     | Q9BTE6  | AARS1        | 10.17    | 8.25     | 9.43     | 9.3     |
| Q8N1B4  | VPS52        | 7.38     | 15       | 9.42     | 10.6    | Q86VW0  | SESTD1       | 6.12     | 5.1      | 9.42     | 6.9     | Q9Y2X7  | GIT1         | 15       | 5.13     | 9.42     | 9.9     |
| P42684  | ABL2         | 7.13     | 9.68     | 9.41     | 8.7     | Q8WUM9  | SLC20A1      | 12.76    | 15       | 9.39     | 12.4    | P37268  | FDFT1        | 15       | 15       | 9.39     | 13.1    |
| Q9H270  | VPS11        | 12.47    | 7.89     | 9.39     | 9.9     | Q04323  | UBXN1        | 15       | 15       | 9.37     | 13.1    | Q9NNW7  | TXNRD2       | 10.62    | 12.08    | 9.38     | 10.7    |
| O43318  | MAP3K7       | 6.28     | 15       | 9.37     | 10.2    | P45880  | VDAC2        | 9.6      | 10.96    | 9.36     | 10.0    | Q8IZV5  | RHD10        | 11.04    | 11.7     | 9.37     | 10.7    |
| P09622  | DLI          | 10.39    | 14.07    | 9.34     | 11.3    | P09211  | GSTP1        | 9.84     | 7.33     | 9.32     | 8.8     | Q9UPP1  | PHF8         | 15       | 10.65    | 9.34     | 11.7    |
| Q8NEZ5  | FBXO22       | 5.77     | 15       | 9.3      | 10.0    | Q8WVCO  | LEO1         | 15       | 15       | 9.27     | 13.1    | O00410  | IPO5         | 9.94     | 9.82     | 9.3      | 9.7     |
| Q9P2J3  | KLHL9        | 8.22     | 13.59    | 9.27     | 10.4    | Q9UKG1  | APPL1        | 15       | 11.64    | 9.25     | 12.0    | Q6PJG2  | C14orf43     | 4.12     | 15       | 9.25     | 9.5     |
| Q8IY16  | EXOC8        | 15       | 15       | 9.24     | 13.1    | P12004  | PCNA         | 9.67     | 14.09    | 9.24     | 11.0    | O75165  | DNAJC13      | 8.26     | 15       | 9.24     | 10.8    |
| P14866  | HNRNPL       | 9.91     | 12.35    | 9.24     | 10.5    | P54136  | RARS         | 10.24    | 12.1     | 9.22     | 10.5    | O15294  | OGT          | 13.22    | 15       | 9.23     | 12.5    |
| Q86U70  | LDB1         | 14       | 15       | 9.21     | 12.7    | O60294  | LCMT2        | 6.24     | 14.69    | 9.21     | 10.0    | O43583  | DENR         | 9.92     | 15       | 9.21     | 11.4    |
| P10619  | CTSA         | 14.13    | 12       | 9.21     | 11.8    | O14558  | PRPSAP1      | 9.32     | 14.3     | 9.2      | 10.9    | P09429  | HMGB1        | 11.78    | 14.41    | 9.2      | 11.8    |
| Q99550  | MPHOSPH9     | 15       | 15       | 9.19     | 13.1    | Q9UBQ0  | VPS29        | 4.15     | 5.07     | 9.19     | 6.1     | Q9Y4B6  | VPRBP        | 12.14    | 15       | 9.19     | 12.1    |
| Q378J9  | GON4L        | 11.63    | 11.98    | 9.18     | 10.9    | Q8N163  | KIAA1967     | 14.81    | 9.43     | 9.15     | 11.1    | O75170  | PPP6R2       | 12.04    | 13.26    | 9.16     | 11.5    |
| Q9NX08  | COMMD8       | 15       | 15       | 9.14     | 13.0    | P6X838  | COPG2        | 11.16    | 10.88    | 9.14     | 10.4    | P51398  | DAP3         | 9.64     | 14.73    | 9.14     | 11.2    |
| Q93074  | MED12        | 15       | 8.43     | 9.14     | 10.9    | Q9H9L4  | KANSL2       | 14.79    | 8.95     | 9.13     | 11.0    | Q99805  | TM9SF2       | 8.7      | 9.16     | 9.13     | 9.0     |
| Q12830  | BPTF         | 6.08     | 15       | 9.11     | 10.1    | P29558  | RBM51        | 5.48     | 6.14     | 9.11     | 6.9     | P51610  | HCFC1        | 10.41    | 12.64    | 9.11     | 10.7    |
| Q9UDX5  | MTFP1        | 14.98    | 15       | 9.1      | 13.0    | Q9UL54  | TAOK2        | 12.89    | 6.47     | 9.1      | 9.5     | P82914  | MRPS15       | 11.19    | 15       | 9.1      | 11.8    |
| Q5VWZ2  | LYPLA1       | 15       | 15       | 9.08     | 13.0    | Q9Y6D6  | ARFGEF1      | 15       | 13.55    | 9.08     | 12.5    | P24534  | EEF1B2       | 5.94     | 15       | 9.08     | 10.0    |
| P20645  | M6PR         | 13.71    | 15       | 9.06     | 12.6    | P62873  | GNB1         | 7.86     | 11.57    | 9.05     | 9.5     | Q9BZG8  | DPH1         | 13.63    | 13.35    | 9.06     | 12.0    |
| Q9H6R6  | ZDHHC6       | 9.23     | 10.69    | 9.05     | 9.7     | Q9H089  | LSG1         | 6.06     | 8.77     | 9.04     | 8.0     | Q9HCM4  | EPB41L5      | 15       | 15       | 9.04     | 13.0    |
| P35268  | RPL22        | 10.29    | 7.65     | 9.04     | 9.0     | P17858  | PFKL         | 9.12     | 12.61    | 9.03     | 10.3    | Q13112  | CHAF1B       | 5.75     | 6.72     | 9.04     | 7.2     |
| O75400  | PRPF40A      | 12.9     | 8.39     | 9.03     | 10.1    | Q86VS8  | HOOK3        | 14.84    | 15       | 9.02     |         |         |              |          |          |          |         |

| uniprot | protein name   | ratio#01 | ratio#02 | ratio#03 | average | uniprot | protein name | ratio#01 | ratio#02 | ratio#03 | average | uniprot | protein name | ratio#01 | ratio#02 | ratio#03 | average |
|---------|----------------|----------|----------|----------|---------|---------|--------------|----------|----------|----------|---------|---------|--------------|----------|----------|----------|---------|
| P36507  | MAP2K2         | 5.98     | 7.6      | 8.55     | 7.4     | P84103  | SRSF3        | 7.73     | 7.1      | 8.53     | 7.8     | Q9Y3E2  | BOLA1        | 8.43     | 10.04    | 8.53     | 9.0     |
| Q3KQU3  | MAP7D1         | 15       | 15       | 8.52     | 12.8    | P82933  | MRPS9        | 4.42     | 11.94    | 8.52     | 8.3     | P26583  | HMG2         | 14.24    | 15       | 8.52     | 12.6    |
| Q9H1U9  | SLC25A51       | 15       | 11.06    | 8.52     | 11.5    | Q86WQ0  | NRT2G2AP     | 10.37    | 15       | 8.5      | 11.3    | O96005  | CLPTM1       | 10.63    | 8.46     | 8.52     | 9.2     |
| P11171  | EPBA1          | 11.05    | 8.84     | 8.5      | 9.5     | Q9C0B1  | FTO          | 7.9      | 13.8     | 8.49     | 10.1    | Q8NFX7  | STXBP6       | 15       | 15       | 8.49     | 12.8    |
| Q06217  | CPT1A          | 8.59     | 12.06    | 8.49     | 9.7     | O9ULG6  | CCPG1        | 8.44     | 15       | 8.48     | 10.6    | Q14126  | DSG2         | 8.1      | 7.91     | 8.49     | 8.2     |
| P50990  | CCT8           | 8.72     | 12.22    | 8.47     | 9.8     | O15550  | KDM6A        | 9.25     | 13.96    | 8.46     | 10.6    | Q5K4L6  | SLC27A3      | 15       | 15       | 8.46     | 12.8    |
| Q9Y5S2  | CDC42BFB       | 8.23     | 11.53    | 8.46     | 9.4     | O75436  | VPS26A       | 5.8      | 6.81     | 8.45     | 7.0     | Q99961  | SH3GL1       | 9.7      | 5.76     | 8.46     | 8.0     |
| Q9H3Q1  | CDC42EP4       | 15       | 15       | 8.43     | 12.8    | P36551  | CPOX         | 7.16     | 12.32    | 8.43     | 9.3     | Q00796  | SORD         | 7.34     | 15       | 8.43     | 10.3    |
| Q8TCG1  | KIAA1524       | 10.36    | 9.44     | 8.43     | 9.4     | Q9BXW9  | FANCD2       | 10.05    | 9.87     | 8.41     | 9.4     | Q15031  | LARS2        | 9.29     | 12.17    | 8.41     | 10.0    |
| Q6ZS17  | FAM65A         | 5.6      | 6.37     | 8.41     | 6.8     | P63096  | GNAI1        | 9.63     | 8.62     | 8.4      | 8.9     | O94829  | IPO13        | 15       | 11.11    | 8.4      | 11.5    |
| Q9P258  | RCC2           | 8.37     | 15       | 8.39     | 10.6    | P35227  | PCGF2        | 14.85    | 14.81    | 8.38     | 12.7    | Q8N9F7  | GDPD1        | 8.03     | 6.56     | 8.39     | 7.7     |
| Q92747  | ARPC1A         | 8.19     | 12.43    | 8.38     | 9.7     | Q5BJH7  | YIF1B        | 5.61     | 14.48    | 8.35     | 9.5     | Q9P2R6  | RERE         | 15       | 15       | 8.36     | 12.8    |
| P00568  | AK1            | 12.67    | 14.78    | 8.34     | 11.9    | Q96BT3  | CENPT        | 15       | 15       | 8.33     | 12.8    | Q14974  | KPNB1        | 8.2      | 8.65     | 8.34     | 8.4     |
| Q13642  | FHL1           | 10.41    | 11.07    | 8.33     | 9.9     | Q86W56  | PARG         | 15       | 13.09    | 8.29     | 12.1    | P56192  | MARS         | 8.03     | 8.86     | 8.31     | 8.4     |
| P10515  | DLAT           | 7.39     | 9.79     | 8.29     | 8.5     | O95870  | ABHD16A      | 10.86    | 6.51     | 8.28     | 8.6     | P08754  | GNAI3        | 9.86     | 8.76     | 8.28     | 9.0     |
| Q15836  | VAMP3          | 11.66    | 8.42     | 8.26     | 9.4     | O95630  | STAMBP       | 10       | 5.7      | 8.25     | 8.0     | P36915  | GNL1         | 15       | 6.9      | 8.25     | 10.1    |
| Q9Y570  | PPME1          | 5.57     | 15       | 8.24     | 9.6     | P08621  | SNRNP70      | 6.39     | 14.53    | 8.23     | 9.7     | P42345  | MTOR         | 7.51     | 9.63     | 8.24     | 8.5     |
| Q15738  | NSDHL          | 15       | 14.39    | 8.23     | 12.5    | P52597  | HNRNPF       | 5.79     | 8.12     | 8.23     | 7.4     | P47914  | RPL29        | 7.86     | 8.74     | 8.23     | 8.3     |
| O75439  | PMPCB          | 8.3      | 10.56    | 8.21     | 9.0     | O43399  | TPD52L2      | 9.15     | 7.45     | 8.21     | 8.3     | Q9HAV0  | GNB4         | 6.23     | 9.44     | 8.21     | 8.0     |
| Q92685  | 2)-PP-Dol alpi | 5.3      | 5.89     | 8.21     | 6.5     | Q865K9  | SCD5         | 15       | 15       | 8.19     | 12.7    | O15042  | UZSURP       | 7.12     | 8.3      | 8.2      | 7.9     |
| Q8Y1B7  | DIS3L2         | 10       | 15       | 8.19     | 11.1    | Q5T6F2  | UBAP2        | 4.94     | 4.33     | 8.19     | 5.8     | Q8WUM4  | PDCD6IP      | 8.32     | 9.39     | 8.19     | 8.6     |
| Q9H2C2  | ARV1           | 13.34    | 15       | 8.18     | 12.2    | Q9BZE4  | GTPBP4       | 7.21     | 15       | 8.17     | 10.1    | Q15418  | RPS6KA1      | 7.42     | 12.55    | 8.18     | 9.4     |
| Q9Y6R4  | MAP3K4         | 15       | 15       | 8.16     | 12.7    | Q9NX24  | NHP2         | 15       | 12.88    | 8.16     | 12.0    | Q8WUP2  | FLBIL1       | 15       | 15       | 8.16     | 12.7    |
| Q92797  | SYMPK          | 8.7      | 12.21    | 8.16     | 9.7     | P53804  | TTC3         | 11.43    | 15       | 8.14     | 11.5    | Q9UFN0  | NIPSNAP3A    | 8.48     | 7.94     | 8.16     | 8.2     |
| Q9BQG0  | MYBBP1A        | 8.36     | 10.64    | 8.14     | 9.0     | Q9P265  | DIP2B        | 4.7      | 10.67    | 8.13     | 7.8     | Q9UJS0  | SLC25A13     | 7.86     | 9.68     | 8.14     | 8.6     |
| Q9NVH6  | TMLHE          | 9.26     | 8.74     | 8.13     | 8.7     | B0LM41  | RBM14/RBM4   | 15       | 15       | 8.1      | 12.7    | P24666  | ACP1         | 15       | 10.04    | 8.11     | 11.1    |
| Q6NVY1  | HIBCH          | 4.8      | 5.4      | 8.1      | 6.1     | P13797  | PLS3         | 7.81     | 9.44     | 8.07     | 8.4     | Q86Y56  | HEATR2       | 7.77     | 9.22     | 8.09     | 8.4     |
| Q13613  | MTMR1          | 10.05    | 7.23     | 8.06     | 8.4     | Q6QP07  | TTC37        | 8.33     | 8.13     | 8.04     | 8.2     | Q8NE01  | CNNM3        | 13.38    | 4.78     | 8.06     | 8.7     |
| Q9NX61  | TMEM161A       | 9.64     | 7.5      | 8.04     | 8.4     | O15070  | OXA1L        | 10.68    | 15       | 8.03     | 11.2    | P82673  | MRPS35       | 15       | 15       | 8.03     | 12.7    |
| Q8IZQ1  | WDFY3          | 4.77     | 10.43    | 8.03     | 7.7     | Q9UHB9  | SRP68        | 7.99     | 8.47     | 8.03     | 8.2     | Q9UJC3  | HOOK1        | 8.63     | 8.55     | 8.03     | 8.4     |
| P09110  | ACAA1          | 12.32    | 5.74     | 8.03     | 8.7     | Q96T23  | RSF1         | 7.32     | 9.33     | 8.02     | 8.2     | Q9HOH0  | INTS2        | 15       | 13.47    | 8.02     | 12.2    |
| Q9NW82  | WDR70          | 15       | 8.05     | 8.02     | 10.4    | Q5FWF4  | ZRANB3       | 15       | 15       | 8        | 12.7    | Q9BQB6  | VKORC1       | 15       | 15       | 8        | 12.7    |
| Q96JX3  | SERAC1         | 15       | 15       | 7.99     | 12.7    | P49643  | PRIM2        | 6.96     | 9.98     | 7.99     | 8.3     | Q9Y315  | DERA         | 15       | 10.41    | 7.99     | 11.1    |
| P52294  | KPNA1          | 15       | 9.65     | 7.99     | 10.9    | P07199  | CENPB        | 10.21    | 10.68    | 7.98     | 9.6     | P43490  | NAMPT        | 6.07     | 6.84     | 7.99     | 7.0     |
| Q9UBW7  | ZMYM2          | 12.65    | 15       | 7.97     | 11.9    | P10809  | HSPD1        | 6.96     | 8.02     | 7.97     | 7.7     | Q9UJA5  | TRMT6        | 10.53    | 13.9     | 7.97     | 10.8    |
| Q8WU90  | ZC3H15         | 7.91     | 10.18    | 7.96     | 8.7     | P30566  | ADSL         | 8.24     | 9.61     | 7.95     | 8.6     | P62736  | ACTA2        | 7.52     | 9.29     | 7.96     | 8.3     |
| P68133  | ACTA1          | 6.92     | 8.85     | 7.95     | 7.9     | Q9H871  | RMND5A       | 15       | 13.35    | 7.94     | 12.1    | P46020  | PHKA1        | 5.42     | 15       | 7.94     | 9.5     |
| Q14203  | DCTN1          | 15       | 8.46     | 7.94     | 10.5    | Q12904  | AIMP1        | 5.52     | 6.77     | 7.94     | 6.7     | O75145  | PPFIA3       | 8.61     | 8.11     | 7.94     | 8.2     |
| P50579  | METAP2         | 11.77    | 6.38     | 7.93     | 8.7     | P27144  | AK4          | 15       | 14.97    | 7.92     | 12.6    | Q9HCM1  | KIAA1551     | 15       | 15       | 7.92     | 12.6    |
| Q99442  | SEC62          | 6.92     | 9.43     | 7.92     | 8.1     | Q9H583  | HEATR1       | 6.95     | 8.87     | 7.91     | 7.9     | Q8NI27  | THOC2        | 9.43     | 8.94     | 7.92     | 8.8     |
| Q723U7  | MON2           | 7.61     | 8.53     | 7.91     | 8.0     | O43572  | AKAP10       | 15       | 15       | 7.9      | 12.6    | Q9H6T3  | RPAP3        | 8.43     | 6.05     | 7.91     | 7.5     |
| Q9BZQ6  | EDEM3          | 15       | 4.53     | 7.9      | 9.1     | P31946  | YWHAB        | 7.53     | 9.91     | 7.88     | 8.4     | Q6P9B9  | INTS5        | 8.1      | 13.2     | 7.89     | 9.7     |
| P21283  | ATP6V1C1       | 9.06     | 4.01     | 7.88     | 7.0     | Q9C0C2  | TNKS1BP1     | 8.5      | 7.57     | 7.85     | 8.0     | Q9UHV7  | MED13        | 13.62    | 15       | 7.86     | 12.2    |
| Q9H9P8  | L2HGDH         | 9.56     | 7.44     | 7.84     | 8.3     | Q14849  | STARD3       | 15       | 15       | 7.82     | 12.6    | Q07666  | KHDRBS1      | 7.87     | 6.91     | 7.84     | 7.5     |
| Q9Y6B7  | AP4B1          | 15       | 15       | 7.82     | 12.6    | Q96S25  | ADO          | 11.18    | 15       | 7.8      | 11.3    | O75528  | TADA3        | 15       | 15       | 7.8      | 12.6    |
| Q8TED1  | GPX8           | 7.4      | 15       | 7.8      | 10.1    | P94189  | ALDH9A1      | 8.85     | 8.64     | 7.8      | 8.4     | Q9Y6Y8  | SEC23IP      | 9.07     | 10.07    | 7.8      | 9.0     |
| P41250  | GARS           | 8.01     | 8.64     | 7.8      | 8.2     | Q9NUQ6  | SPATS2L      | 15       | 13.46    | 7.79     | 12.1    | O95433  | AHSA1        | 6.98     | 7.25     | 7.8      | 7.3     |
| Q10570  | CPSF1          | 11.11    | 5.29     | 7.79     | 8.1     | Q75N03  | CBLL1        | 14.18    | 10.19    | 7.78     | 10.7    | P41743  | PRKCI        | 13.61    | 15       | 7.78     | 12.1    |
| P24539  | ATP5F1         | 10.41    | 8.56     | 7.78     | 8.9     | Q9Y6B6  | SAR1B        | 7.24     | 14.99    | 7.76     | 10.0    | Q13618  | CUL3         | 4.64     | 4.49     | 7.77     | 5.6     |
| Q96L34  | MARK4          | 11.12    | 11.46    | 7.76     | 10.1    | Q9C0C9  | UBE2O        | 10.67    | 10.77    | 7.75     | 9.7     | Q9NRY4  | ARHGAP35     | 15       | 14.87    | 7.75     | 12.5    |
| Q9Y496  | KIF3A          | 4.97     | 8.35     | 7.75     | 7.0     | Q16881  | TXNRD1       | 7.56     | 15       | 7.73     | 10.1    | P78316  | NOP14        | 15       | 15       | 7.73     | 12.6    |
| Q8NAN2  | FAM73A         | 5.83     | 14.7     | 7.73     | 9.4     | Q9NZJ4  | SACS         | 10.08    | 15       | 7.72     | 10.9    | O75717  | WDHD1        | 13.46    | 8.38     | 7.73     | 9.9     |
| Q8NCM8  | DYNC2H1        | 9.91     | 7.51     | 7.72     | 8.4     | P31689  | DNAJA1       | 6.64     | 15       | 7.71     | 9.8     | Q43169  | CYB5B        | 8.04     | 7.05     | 7.72     | 7.6     |
| Q9UQ16  | DNM3           | 4.05     | 6.29     | 7.7      | 6.0     | O00541  | PES1         | 9.09     | 10.7     | 7.66     | 9.2     | Q9NVJ2  | ARL8B        | 12.21    | 9.8      | 7.68     | 9.9     |
| Q07955  | SRSF1          | 4.95     | 7.51     | 7.65     | 6.7     | P61599  | NAA20        | 7.49     | 8.88     | 7.64     | 8.0     | Q9H307  | PNN          | 6.82     | 5.12     | 7.65     | 6.5     |
| O43813  | LANCL1         | 7.3      | 15       | 7.63     | 10.0    | Q9Y223  | GNE          | 7.2      | 11.12    | 7.63     | 8.7     | P52306  | RAP1GDS1     | 9.45     | 14.39    | 7.63     | 10.5    |
| Q9UHY1  | NRBP1          | 15       | 7.17     | 7.63     | 9.9     | Q9P211  | GMPPR2       | 7.55     | 15       | 7.61     | 10.1    | Q9UK73  | FEM1B        | 10.53    | 11.17    | 7.62     | 9.8     |
| Q9Y3T9  | NOC2L          | 6.93     | 9.58     | 7.61     | 8.0     | Q9UNQ2  | DIMT1        | 4.88     | 4.8      | 7.6      | 5.8     | P30520  | ADSS         | 6.84     | 8.7      | 7.6      | 7.7     |
| Q96ER3  | SAAL1          | 15       | 15       | 7.59     | 12.5    | P82663  | MRPS25       | 10.94    | 12.68    | 7.58     | 10.4    | Q9UI43  | FTSJ2        | 15       | 15       | 7.59     | 12.5    |
| Q86XK3  | SFR1           | 15       | 15       | 7.57     | 12.5    | Q16643  | DBN1         | 7.58     | 9.5      | 7.56     | 8.2     | Q2TAY7  | SMU1         | 5.8      | 5.05     | 7.57     | 6.1     |
| Q6PML9  | SLC30A9        | 15       | 15       | 7.55     | 12.5    | Q9H3N1  | TMX1         | 10.27    | 13.37    | 7.55     | 10.4    | Q9Y4F3  | KIAA0430     | 14.99    | 15       | 7.55     | 12.5    |
| Q92990  | GLMN           | 8.59     | 8.99     | 7.54     | 8.7     | P49207  | RPL34        | 7.12     | 8.32     | 7.53     | 7.7     | Q8WTW3  | COG1         | 10.34    | 15       | 7.53     | 11.0    |
| P62304  | SNRPE          | 11.68    | 8.09     | 7.53     | 9.1     | O00255  | MEN1         | 7.39     | 12.28    | 7.49     | 9.1     | Q9HBM0  | VEZT         | 7.8      | 8.97     | 7.5      | 8.1     |
| Q9H6U6  | BCAS3          | 11.76    | 11.44    | 7.49     | 10.2    | Q9P2N6  | KANSL3       | 11.54    | 12.54    | 7.48     | 10.5    | Q99459  | CDC5L        | 8.76     | 4.71     | 7.49     | 7.0     |
| Q99536  | VAT1           | 7.16     | 7.19     | 7.48     | 7.3     | Q99543  | DNAJC2       | 12.57    | 12.21    | 7.47     | 10.8    | Q9UNH6  | SNX7         | 15       | 15       | 7.47     | 12.5    |
| Q94804  | STK10          | 15       | 10.03    | 7.47     | 10.8    | Q99832  | CCT7         | 7.21     | 8.23     | 7.45     | 7.6     | Q9Y6X4  | FAM169A      | 11.11    | 15       | 7.45     | 11.2    |
| Q6KCT9  | NIPBL          | 14.56    | 8.29     | 7.44     | 10.1    | P46821  | MAP1B        | 10.29    | 15       | 7.43     | 10.9    | Q08945  | SSRP1        | 4.73     | 4.84     | 7.44     | 5.7     |
| O14980  | XPO1           | 9.98     | 9.91     | 7.43     | 9.1     | Q86U38  | NOP9         | 9.48     | 15       | 7.42     | 10.6    | O60306  | AQR          | 10.29    | 6.82     | 7.43     | 8.2     |
| P51965  | UBE2E1         | 11.64    | 5.22     | 7.42     | 8.1     | Q66PJ3  | ARL6IP4      | 8.73     | 11.35    | 7.4      | 9.2     | Q95861  | BPNT1        | 10.97    | 15       | 7.4      | 11.1    |
| Q6NYC1  | JMJD6          | 5.52     | 6.62     | 7.39     | 6.5     | P60891  | PRPS1        | 7.62     | 7.29     | 7.38     | 7.4     | Q03001  | DST          | 5.18     | 15       | 7.38     | 9.2     |
| Q86T12  | DPP9           | 11.77    | 15       | 7.37     | 11.4    | P35520  | CBS          | 8.6      | 6.25     | 7.37     | 7.4     | Q96QC0  | PPP1R10      | 15       | 9.59     | 7.37     | 10.7    |
| Q7L2E3  | DHX30          | 7.91     | 8.48     | 7.36     | 7.9     | Q95275  | UBXN4        | 6.88     | 7.98     | 7.35     | 7.4     | Q95347  | SMC2         | 6.78     | 7.04     | 7.36     | 7.1     |
| P32929  | CTH            | 5.66     | 15       | 7.34     | 9.3     | Q96521  | RAB40C       | 15       | 9.73     | 7.33     | 10.7    | Q8TCY9  | URGCP        | 15       | 11.12    | 7.34     | 11.2    |
| Q8WV07  | ORAOV1         | 15       | 15       | 7.32     | 12.4    | P14735  | IDE          | 4.24     | 4.45     | 7.31     | 5.3     | Q14690  | PDCD11       | 15       | 13.93    | 7.31     | 12.1    |
|         |                |          |          |          |         |         |              |          |          |          |         |         |              |          |          |          |         |

| uniprot | protein name | ratio#01 | ratio#02 | ratio#03 | average | uniprot | protein name | ratio#01 | ratio#02 | ratio#03 | average | uniprot | protein name | ratio#01 | ratio#02 | ratio#03 | average |
|---------|--------------|----------|----------|----------|---------|---------|--------------|----------|----------|----------|---------|---------|--------------|----------|----------|----------|---------|
| P13796  | LCP1         | 6.73     | 9.67     | 6.8      | 7.7     | O94822  | LTN1         | 6        | 6.99     | 6.8      | 6.6     | P43034  | FAFH1B1      | 5.66     | 7.8      | 6.8      | 6.8     |
| Q13620  | CUL4B        | 6.6      | 5.45     | 6.8      | 6.3     | O98CP6  | GRAMD1A      | 15       | 15       | 6.77     | 12.3    | O00203  | AC3B1        | 4.25     | 8.98     | 6.78     | 6.7     |
| P52565  | ARHGDI1A     | 6.7      | 15       | 6.77     | 9.5     | O43795  | MYO1B        | 15       | 12.34    | 6.76     | 11.4    | Q9HB73  | CACYBP       | 6.1      | 7.82     | 6.77     | 6.9     |
| Q9UBL3  | ASH2L        | 7.68     | 11.41    | 6.76     | 8.6     | Q12923  | PTPN13       | 15       | 15       | 6.75     | 12.3    | P00491  | PNP          | 4.17     | 4.03     | 6.76     | 5.0     |
| Q8WV73  | TRAPPC12     | 15       | 7.96     | 6.73     | 9.9     | Q5JSH3  | WDR44        | 8.04     | 11.49    | 6.72     | 8.8     | Q6Y7W6  | GIGYF2       | 4.59     | 5.07     | 6.73     | 5.6     |
| P49753  | ACOT2        | 15       | 14.34    | 6.7      | 12.0    | Q86XA9  | HEATR5A      | 12.41    | 7.93     | 6.7      | 9.0     | Q8TAF3  | WDR48        | 15       | 8.84     | 6.7      | 10.2    |
| P61247  | RPS3A        | 6.45     | 6.74     | 6.7      | 6.6     | P35556  | FBN2         | 4.73     | 8.19     | 6.69     | 6.5     | P08559  | PDHA1        | 6.6      | 8.77     | 6.69     | 7.4     |
| Q9NT15  | PDS5B        | 5.89     | 7.63     | 6.69     | 6.7     | P62258  | YWHAH        | 6.49     | 8.05     | 6.67     | 7.1     | Q9UNN5  | FAF1         | 6.79     | 15       | 6.67     | 9.5     |
| Q9NRR4  | DROSHA       | 15       | 15       | 6.65     | 12.2    | Q15172  | PPP2R5A      | 12.02    | 15       | 6.63     | 11.2    | P55265  | ADAR         | 6.8      | 7.75     | 6.64     | 7.1     |
| Q8IUR7  | ARMC8        | 11.12    | 15       | 6.63     | 10.9    | O75879  | PET112       | 15       | 10.07    | 6.62     | 10.6    | Q5VYK3  | ECM29        | 6.92     | 8        | 6.63     | 7.2     |
| P06493  | CDK1         | 7.63     | 8.54     | 6.6      | 7.6     | Q8TDH9  | MUTED        | 15       | 15       | 6.59     | 12.2    | Q8N4P3  | HDDC3        | 10.28    | 6.54     | 6.6      | 7.8     |
| Q9NPF4  | OSGEP        | 6.21     | 6.04     | 6.58     | 6.3     | Q14683  | SMC1A        | 6.39     | 8.6      | 6.53     | 7.2     | Q9BQ39  | DDX50        | 4.98     | 9.18     | 6.54     | 6.9     |
| F8WC89  | SAC3D1       | 15       | 5.18     | 6.53     | 8.9     | P08238  | HSP90AB1     | 5.83     | 6.94     | 6.52     | 6.4     | O60725  | ICMT         | 15       | 15       | 6.52     | 12.2    |
| Q15370  | TCEB2        | 8.67     | 6.74     | 6.51     | 7.3     | Q9UHB7  | AFF4         | 15       | 15       | 6.5      | 12.2    | P61981  | YWHAH        | 4.28     | 6.3      | 6.51     | 5.7     |
| O95394  | PGM3         | 8.17     | 15       | 6.5      | 9.9     | P43243  | MATR3        | 5.9      | 6.87     | 6.5      | 6.4     | P60953  | CDC42        | 4.59     | 8.51     | 6.5      | 6.5     |
| O14617  | AP3D1        | 6.43     | 14.98    | 6.49     | 9.3     | Q9NX74  | DUSL2        | 6.41     | 15       | 6.48     | 9.3     | Q9NWW5  | MRPL22       | 15       | 15       | 6.48     | 12.2    |
| Q9NVV4  | MTPAP        | 5.02     | 11.62    | 6.48     | 7.7     | Q9UNX4  | WDR3         | 15       | 5.99     | 6.48     | 9.2     | P06730  | EIF4E        | 10.17    | 6.7      | 6.48     | 7.8     |
| O43815  | STRN         | 13.43    | 13.45    | 6.46     | 11.1    | P52789  | HK2          | 11.5     | 8.94     | 6.46     | 9.0     | P48059  | LIMS1        | 4.42     | 11.38    | 6.46     | 7.4     |
| Q9NXB0  | MKS1         | 13.09    | 15       | 6.45     | 11.5    | Q96S26  | CDK5RAP1     | 6.29     | 11.22    | 6.45     | 8.0     | Q9H0H5  | RACGAP1      | 5.46     | 15       | 6.45     | 9.0     |
| Q92621  | NUP205       | 7.36     | 7.92     | 6.45     | 7.2     | Q9Y3A5  | SBDS         | 10.18    | 11.18    | 6.43     | 9.3     | P46459  | NSF          | 5.52     | 6.05     | 6.45     | 6.0     |
| Q9NZ32  | ACTR10       | 5.82     | 9.32     | 6.43     | 7.2     | O15360  | FANCA        | 10.79    | 11.78    | 6.41     | 9.7     | Q5VWU0  | RSBN1        | 10.96    | 15       | 6.42     | 10.8    |
| Q13330  | MTA1         | 10.56    | 5.72     | 6.41     | 7.6     | P13807  | GYS1         | 6        | 6.1      | 6.4      | 6.2     | P23381  | WARS         | 6.29     | 8.57     | 6.4      | 7.1     |
| P22695  | UQCRC2       | 6.87     | 6.92     | 6.39     | 6.7     | Q14160  | SCRIB        | 12.88    | 15       | 6.38     | 11.4    | P57678  | GEMIN4       | 5.81     | 6.89     | 6.39     | 6.4     |
| Q9P2D3  | HEATR5B      | 9.93     | 15       | 6.37     | 10.4    | P35914  | HMGCL        | 14.55    | 15       | 6.36     | 12.0    | Q07864  | POLE         | 4.98     | 5.91     | 6.37     | 5.8     |
| Q9Y262  | EIF3L        | 5.82     | 7.01     | 6.35     | 6.4     | Q03518  | TAP1         | 10.13    | 15       | 6.33     | 10.5    | Q9NV11  | FANCI        | 7.17     | 8.68     | 6.34     | 7.4     |
| Q01970  | PLCB3        | 4.62     | 12.91    | 6.33     | 8.0     | Q13206  | DDX10        | 10.77    | 7.41     | 6.31     | 8.2     | P30519  | HMOX2        | 7.39     | 8.05     | 6.32     | 7.3     |
| Q15008  | PSMD6        | 7.26     | 6.89     | 6.31     | 6.8     | Q9BU89  | DOHH         | 15       | 15       | 6.29     | 12.1    | Q12874  | SF3A3        | 6.29     | 6.73     | 6.3      | 6.4     |
| Q12888  | TP53BP1      | 10.96    | 15       | 6.29     | 10.8    | Q8NI77  | KIF18A       | 11.44    | 15       | 6.28     | 10.9    | P00403  | MT-CO2       | 6.55     | 7.16     | 6.29     | 6.7     |
| Q9HC88  | CWC22        | 6.23     | 9.77     | 6.28     | 7.4     | Q9Y3U8  | RPL36        | 6.98     | 8.11     | 6.27     | 7.1     | Q15050  | RRS1         | 9        | 7.3      | 6.28     | 7.5     |
| Q9HD20  | ATP13A1      | 7.85     | 8        | 6.27     | 7.4     | Q13619  | CUL4A        | 6.6      | 4.71     | 6.25     | 5.9     | P47897  | QARS         | 5.85     | 6.67     | 6.27     | 6.3     |
| Q9H814  | PHAX         | 15       | 15       | 6.24     | 12.1    | Q5JSL3  | DOCK11       | 11.32    | 11.41    | 6.24     | 9.7     | Q8N201  | INTS1        | 8.3      | 15       | 6.24     | 9.8     |
| Q6UW7P  | LCLAT1       | 6.79     | 9.03     | 6.22     | 7.3     | Q7Z2K6  | ERMP1        | 15       | 4.81     | 6.21     | 8.7     | Q9BTC8  | MTA3         | 11       | 10.85    | 6.21     | 9.4     |
| P49368  | CCT3         | 5.95     | 6.95     | 6.19     | 6.4     | P52272  | HNRNPM       | 5.24     | 7.64     | 6.17     | 6.4     | O75909  | CCNK         | 6.09     | 15       | 6.18     | 9.1     |
| P42126  | ECI1         | 6.05     | 7.21     | 6.17     | 6.5     | Q14671  | PUM1         | 5.87     | 5.76     | 6.17     | 5.9     | P43897  | TSFM         | 5.6      | 5.92     | 6.17     | 5.9     |
| Q9H6S0  | YTHDC2       | 4.98     | 4.91     | 6.16     | 5.4     | Q08379  | GOLGA2       | 15       | 7.58     | 6.15     | 9.6     | O75718  | CRTPA        | 15       | 10.38    | 6.15     | 10.5    |
| O60318  | MCM3AP       | 5.42     | 7.32     | 6.15     | 6.3     | Q5TBB1  | RNASEH2B     | 6.5      | 13.55    | 6.14     | 8.7     | Q9UNY4  | TTF2         | 10.07    | 15       | 6.14     | 10.4    |
| Q01813  | PFKP         | 7.02     | 13.38    | 6.14     | 8.8     | Q9GZY8  | MFF          | 11.46    | 11.24    | 6.14     | 9.6     | P48509  | CD151        | 12       | 11.64    | 6.14     | 9.9     |
| Q9ULU4  | ZMYND8       | 15       | 9.12     | 6.13     | 10.1    | P26373  | RPL13        | 5.62     | 6.4      | 6.13     | 6.1     | Q9BPP3  | NCAPG        | 5.49     | 6.97     | 6.13     | 6.2     |
| P28074  | PSMB5        | 6.66     | 5.8      | 6.13     | 6.2     | P61224  | RAP1B        | 5.71     | 6.99     | 6.12     | 6.3     | P62834  | RAP1A        | 14.49    | 15       | 6.12     | 11.9    |
| O15121  | DEGS1        | 5.35     | 6.86     | 6.12     | 6.1     | P62241  | RPS8         | 5.93     | 6.99     | 6.08     | 6.3     | Q6IA86  | ELP2         | 15       | 15       | 6.1      | 12.0    |
| Q8TEQ6  | GEMIN5       | 8.88     | 12.3     | 6.06     | 9.1     | P30626  | SRI          | 7.71     | 5.87     | 6.06     | 6.5     | Q14781  | CBX2         | 5.95     | 7.32     | 6.06     | 6.4     |
| P18850  | ATF6         | 6.99     | 15       | 6.05     | 9.3     | Q5T5Y3  | CAMSAP1      | 15       | 6.76     | 6.04     | 9.3     | Q9UBU9  | NXF1         | 6.64     | 4.06     | 6.05     | 5.6     |
| P23368  | ME2          | 7.04     | 6.28     | 6.04     | 6.5     | Q9UPN6  | SCAF8        | 10.39    | 15       | 6.03     | 10.5    | Q6VEQ5  | WASH2P       | 5.47     | 6.06     | 6.04     | 5.9     |
| P26440  | IVD          | 6.64     | 15       | 6.03     | 9.2     | Q92538  | GBF1         | 6.97     | 8.25     | 6.02     | 7.1     | P11177  | PDHB         | 7.64     | 7.68     | 6.03     | 7.1     |
| Q93008  | USP9X        | 6.31     | 7.69     | 6.02     | 6.7     | Q9NXW2  | DNAJB2       | 6.4      | 5.16     | 6.02     | 5.9     | Q96CS3  | FAF2         | 6.45     | 5.39     | 6.02     | 6.0     |
| Q6P9B6  | KIAA1609     | 4.05     | 15       | 6        | 8.4     | Q9HAU5  | UPF2         | 6.75     | 8.61     | 5.98     | 7.1     | O14656  | TOR1A        | 15       | 5.77     | 5.99     | 8.9     |
| P61020  | RAB5B        | 13.35    | 12.02    | 5.96     | 10.4    | Q9Y276  | BCS1L        | 13.07    | 6.5      | 5.96     | 8.5     | Q562R1  | ACTBL2       | 6.84     | 7.78     | 5.96     | 6.9     |
| Q86Y91  | KIF18B       | 11.44    | 15       | 5.95     | 10.8    | Q13347  | EIF3         | 6.84     | 5.8      | 5.95     | 6.2     | Q9BVK6  | TMED9        | 5.7      | 14.34    | 5.95     | 8.7     |
| Q14166  | TLL12        | 7.27     | 4.66     | 5.95     | 6.0     | O43684  | BUB3         | 12.84    | 11.91    | 5.94     | 10.2    | Q7L8L6  | FASTKD5      | 8.26     | 15       | 5.94     | 9.7     |
| Q5J5Z5  | PRRC2B       | 4.9      | 5.57     | 5.94     | 5.5     | P04181  | OAT          | 6.24     | 8.41     | 5.93     | 6.9     | Q8NH9H  | ATL2         | 10.95    | 14.46    | 5.93     | 10.4    |
| P41252  | IARS         | 6.28     | 6.89     | 5.93     | 6.4     | O60216  | RAD21        | 6.9      | 6.84     | 5.92     | 6.6     | Q9Y3D3  | MRPS16       | 15       | 5.82     | 5.93     | 8.9     |
| P13995  | MTHFD2       | 5.8      | 6.99     | 5.91     | 6.2     | O75694  | NUP155       | 5.95     | 5.19     | 5.91     | 5.7     | P61978  | HNRNPK       | 5.82     | 6.14     | 5.91     | 6.0     |
| O43293  | DAPK3        | 13.72    | 9.27     | 5.9      | 9.6     | P38606  | ATP6V1A      | 6.78     | 5.76     | 5.89     | 6.1     | Q7Z3K3  | POGZ         | 9.78     | 8.69     | 5.9      | 8.1     |
| Q99426  | TBCB         | 5.11     | 5.14     | 5.89     | 5.4     | O94901  | SUN1         | 7.96     | 15       | 5.87     | 9.6     | Q07960  | ARHGAP1      | 5.47     | 4.7      | 5.88     | 5.4     |
| Q9UHD2  | TBK1         | 5.6      | 10.41    | 5.86     | 7.3     | P16298  | PPP3CB       | 4.32     | 5.12     | 5.85     | 5.1     | Q96QD8  | SLC38A2      | 7.77     | 15       | 5.85     | 9.5     |
| Q14964  | RAB39A       | 15       | 15       | 5.84     | 11.9    | P61586  | RHOA         | 11.13    | 9.26     | 5.83     | 8.7     | P63010  | AP2B1        | 6.7      | 9.5      | 5.84     | 7.3     |
| Q6PJG6  | BRAT1        | 6.24     | 6.83     | 5.83     | 6.3     | Q9NUJ3  | TCPI11L1     | 15       | 15       | 5.8      | 11.9    | P51809  | VAMP7        | 11.62    | 15       | 5.82     | 10.8    |
| Q9P2R7  | SUCLA2       | 6.42     | 7.46     | 5.79     | 6.6     | Q6DK11  | RPL7L1       | 11.46    | 15       | 5.77     | 10.7    | P40227  | CCT6A        | 5.77     | 6.37     | 5.79     | 6.0     |
| Q9UKI8  | TLK1         | 15       | 10.46    | 5.77     | 10.4    | Q9Y678  | COPG1        | 6.15     | 6.69     | 5.77     | 6.2     | P49005  | POLD2        | 5.21     | 7.61     | 5.77     | 6.2     |
| Q16795  | NDUFA9       | 7.74     | 4.96     | 5.76     | 6.2     | P46776  | RPL27A       | 6.18     | 7.06     | 5.75     | 6.3     | Q10567  | AP1B1        | 4.03     | 7.43     | 5.75     | 5.7     |
| O43847  | NRD1         | 11.56    | 8.88     | 5.74     | 8.7     | P22102  | GART         | 5.38     | 7.16     | 5.73     | 6.1     | Q86X55  | CARM1        | 5.49     | 6.53     | 5.74     | 5.9     |
| Q94808  | GFPT2        | 5.99     | 15       | 5.72     | 8.9     | Q8WXH0  | SYNE2        | 8.04     | 11.53    | 5.71     | 8.4     | Q9BQ52  | ELAC2        | 5.17     | 5.62     | 5.72     | 5.5     |
| Q8NAV1  | PRPF38A      | 15       | 10.03    | 5.71     | 10.2    | P35612  | ADD2         | 7.48     | 15       | 5.68     | 9.4     | Q6N069  | NAA16        | 4.16     | 7.51     | 5.71     | 5.8     |
| O43615  | TIMM44       | 5.97     | 5.93     | 5.68     | 5.9     | Q12800  | TFCP2        | 15       | 4.57     | 5.67     | 8.4     | P40426  | PBX3         | 15       | 15       | 5.67     | 11.9    |
| Q8N1F7  | NUP93        | 6.21     | 7.02     | 5.66     | 6.3     | Q6ZRR5  | MMS22L       | 6.75     | 15       | 5.65     | 9.1     | Q8NBF2  | NHLRC2       | 6.86     | 6.83     | 5.66     | 6.5     |
| Q12981  | BNIP1        | 10.07    | 8.38     | 5.65     | 8.0     | P61163  | ACTR1A       | 6.21     | 6.75     | 5.63     | 6.2     | O75874  | IDH1         | 5.96     | 11.55    | 5.63     | 7.7     |
| P41091  | EIF2S3       | 4.9      | 5.87     | 5.63     | 5.5     | O65056  | SYNCRIP      | 5.34     | 6.1      | 5.62     | 5.7     | P00441  | SOD1         | 7.28     | 9.4      | 5.62     | 7.4     |
| P30419  | NMT1         | 4.22     | 5.4      | 5.62     | 5.1     | P00918  | CA2          | 5.3      | 5.86     | 5.61     | 5.6     | Q04446  | GBE1         | 15       | 10.62    | 5.61     | 10.4    |
| P21796  | VDAC1        | 5.81     | 5.75     | 5.61     | 5.7     | Q969H8  | C19orf10     | 15       | 9.49     | 5.6      | 10.0    | Q96M27  | PRRC1        | 13.39    | 11.57    | 5.6      | 10.2    |
| P62140  | PPP1CB       | 8.16     | 6.47     | 5.59     | 6.7     | P84077  | ARF1         | 6.62     | 4.91     | 5.59     | 5.7     | P61204  | ARF3         | 6.62     | 4.91     | 5.59     | 5.7     |
| Q9NYF8  | BCLAF1       | 4.63     | 8.78     | 5.58     | 6.3     | P49761  | CLK3         | 5.41     | 8.97     | 5.57     | 6.7     | O76003  | GLRX3        | 8.49     | 5.84     | 5.58     | 6.6     |
| Q9BSJ2  | TUBGCP2      | 8.29     | 7.98     | 5.57     | 7.3     | Q9H0U3  | MAGT1        | 8.99     | 7.13     | 5.55     | 7.2     | Q1KMD3  | HNRNPUL2     | 6.92     | 8.22     | 5.56     | 6.9     |
| Q8WVM7  | STAG1        | 5.44     | 4.95     | 5.55     | 5.3     | Q4LE39  | ARID4B       | 5.49     | 6.99     | 5.54     | 6.0     | P33527  | ABCC1        | 5.25     | 14.64    | 5.54     | 8.5     |
| Q6UB35  | MTHFD1L      | 5.2      | 6.42     | 5.54     | 5.7     | Q15118  | PDK1         | 7.8      | 9.27     | 5.53     | 7.5     | Q13625  | TP53BP2      | 13.85    | 4.94     | 5.54     | 8.1     |
| Q8IUV8  | UBR2         | 15       | 15       | 5.52     | 11.8    | Q14146  | URB2         | 6.4      | 4.15     |          |         |         |              |          |          |          |         |

| uniprot | protein name | ratio#01 | ratio#02 | ratio#03 | average | uniprot | protein name | ratio#01 | ratio#02 | ratio#03 | average | uniprot | protein name   | ratio#01 | ratio#02 | ratio#03 | average |
|---------|--------------|----------|----------|----------|---------|---------|--------------|----------|----------|----------|---------|---------|----------------|----------|----------|----------|---------|
| P62316  | SNRPD2       | 4.6      | 5.88     | 5.1      | 5.2     | Q7KZ17  | MARK2        | 7.25     | 6.7      | 5.09     | 6.3     | Q96S97  | MYADM          | 15       | 5.47     | 5.1      | 8.5     |
| Q9BV20  | MR1          | 6.81     | 6.49     | 5.09     | 6.1     | Q81YB8  | SUPV3L1      | 4.24     | 8.4      | 5.07     | 5.9     | Q66K14  | TBC1D9B        | 6.72     | 6.3      | 5.09     | 6.0     |
| P78347  | GTF2I        | 4.29     | 5.34     | 5.07     | 4.9     | Q6ZRS2  | SRGAP        | 4.57     | 4.16     | 5.04     | 4.6     | O00767  | SCD            | 15       | 12.26    | 5.06     | 10.8    |
| O00231  | PSMD11       | 4.63     | 5.29     | 5.03     | 5.0     | Q9UM22  | EPDR1        | 15       | 15       | 5.01     | 11.7    | P55884  | EIF3B          | 4.1      | 5.06     | 5.02     | 4.7     |
| P35606  | COPB2        | 4.78     | 4.88     | 5.01     | 4.9     | P49642  | PRIM1        | 4.94     | 10.67    | 4.99     | 6.9     | O95782  | AP2A1          | 4.37     | 4.67     | 5        | 4.7     |
| Q05209  | PTPN12       | 7.69     | 8.19     | 4.99     | 7.0     | P53041  | PPP5C        | 4.43     | 5.79     | 4.97     | 5.1     | P42025  | ACTR1B         | 15       | 10.88    | 4.98     | 10.3    |
| Q9NWT1  | PAK1IP1      | 15       | 4.61     | 4.96     | 8.2     | P27816  | MAP4         | 5.22     | 7.26     | 4.95     | 5.8     | O95239  | KIF4A          | 10.71    | 12.67    | 4.95     | 9.4     |
| P10768  | ESD          | 5.43     | 5.7      | 4.95     | 5.4     | P36873  | PPP1CC       | 4.8      | 4.61     | 4.92     | 4.8     | Q9UM54  | MYO6           | 6.26     | 5.28     | 4.95     | 5.5     |
| Q9HAV4  | XPO5         | 5.22     | 6.29     | 4.91     | 5.5     | P53618  | COPB1        | 5.16     | 5.78     | 4.91     | 5.3     | O14579  | COPE           | 15       | 5.83     | 4.91     | 8.6     |
| B0V043  | VARS         | 4.4      | 4.86     | 4.91     | 4.7     | Q9BXJ9  | NAA15        | 4.22     | 6.38     | 4.9      | 5.2     | Q9BQ75  | C3orf26        | 5.99     | 10.48    | 4.9      | 7.1     |
| Q75153  | KIAA0664     | 4.21     | 4.9      | 4.9      | 4.7     | P61289  | PSME3        | 6.67     | 6.88     | 4.89     | 6.1     | Q4KMP7  | TBC1D10B       | 4.2      | 15       | 4.89     | 8.0     |
| Q9UHJ6  | SHPK         | 12.81    | 4.22     | 4.89     | 7.3     | P11908  | PRPS2        | 7.71     | 14.97    | 4.88     | 9.2     | Q9Y689  | ARL5A          | 13.07    | 15       | 4.88     | 11.0    |
| P33176  | KIF5B        | 5.11     | 6.29     | 4.88     | 5.4     | Q9NSD9  | FARSB        | 4.67     | 5.3      | 4.88     | 5.0     | P21108  | PRPS1L1        | 7.47     | 6.05     | 4.88     | 6.1     |
| P62244  | RPS15A       | 4.86     | 4.56     | 4.88     | 4.8     | O15047  | SETD1A       | 15       | 10.55    | 4.87     | 10.1    | Q81Z83  | ALDH16A1       | 5.17     | 12.77    | 4.87     | 7.6     |
| P07737  | PFN1         | 5.06     | 4.88     | 4.87     | 4.9     | P30086  | PEBP1        | 4.78     | 6.08     | 4.86     | 5.2     | O94925  | GLS            | 7.73     | 7.03     | 4.86     | 6.5     |
| Q92793  | CREBBP       | 4.55     | 4.77     | 4.86     | 4.7     | Q96EK5  | KIAA1279     | 7.07     | 5.55     | 4.85     | 5.8     | P18077  | RPL35A         | 6.58     | 6.55     | 4.85     | 6.0     |
| O94776  | MTA2         | 4.18     | 5.19     | 4.85     | 4.7     | P22059  | OSBP         | 5.55     | 8.66     | 4.84     | 6.4     | P20042  | EIF2S2         | 8.86     | 15       | 4.84     | 9.6     |
| P61011  | SRP54        | 4.39     | 5.33     | 4.84     | 4.9     | O00566  | MPHOSPH10    | 8.91     | 4.83     | 4.83     | 6.2     | P04844  | RPN2           | 6.85     | 5.07     | 4.83     | 5.6     |
| Q13617  | CUL2         | 6.65     | 10.95    | 4.82     | 7.5     | P45954  | ACADSB       | 4.73     | 9.73     | 4.8      | 6.4     | P62987  | UBA52          | 5.7      | 15       | 4.8      | 8.5     |
| Q16512  | PKN1         | 4.6      | 8.62     | 4.8      | 6.0     | O16658  | FSCN1        | 5.34     | 7.79     | 4.79     | 6.0     | P23396  | RPS3           | 4.65     | 5.01     | 4.8      | 4.8     |
| Q9Y211  | NISCH        | 15       | 4.87     | 4.79     | 8.2     | Q9GZZ1  | NAA50        | 7.71     | 4.38     | 4.77     | 5.6     | P20073  | ANXA7          | 5.06     | 5.43     | 4.78     | 5.1     |
| Q9NXF1  | TEX10        | 4.58     | 4.88     | 4.76     | 4.7     | P60842  | EIF4A1       | 4.51     | 5.32     | 4.75     | 4.9     | O00299  | CLIC1          | 8.32     | 9.44     | 4.75     | 7.5     |
| Q8NCW5  | APOA1BP      | 5.81     | 4.82     | 4.73     | 5.1     | Q96FC9  | DDX11        | 11.08    | 11.18    | 4.72     | 9.0     | P24390  | KDELR1         | 7.06     | 15       | 4.72     | 8.9     |
| Q9ULT8  | HECTD1       | 5.06     | 8.62     | 4.72     | 6.1     | P12955  | PEPD         | 4.47     | 5.42     | 4.72     | 4.9     | P55084  | HADHB          | 14.77    | 6.23     | 4.72     | 8.6     |
| Q9Y385  | UBE2J1       | 13.36    | 15       | 4.71     | 11.0    | Q8NHS3  | MFSDB        | 15       | 15       | 4.7      | 11.6    | Q9Y2Z4  | YARS2          | 6.98     | 5.67     | 4.71     | 5.8     |
| Q12840  | KIF5A        | 6.83     | 6.04     | 4.7      | 5.9     | Q92616  | GCN1L1       | 4.5      | 5.58     | 4.68     | 4.9     | P62826  | RAN            | 4.47     | 4.59     | 4.69     | 4.6     |
| Q96HA1  | POM121       | 8.2      | 5.25     | 4.68     | 6.0     | P62979  | RPS27A       | 5.75     | 6.63     | 4.66     | 5.7     | Q9HCS7  | XAB2           | 4.17     | 4.62     | 4.67     | 4.5     |
| Q16555  | DPYSL2       | 6.01     | 6.07     | 4.66     | 5.6     | P11766  | ADH5         | 4.77     | 5.8      | 4.66     | 5.1     | Q9UNS2  | COP3S          | 5.19     | 5.95     | 4.66     | 5.3     |
| P07814  | EPRS         | 4.26     | 4.5      | 4.66     | 4.5     | Q69YN4  | KIAA1429     | 8.27     | 11.94    | 4.65     | 8.3     | P51003  | PAPOLA         | 4.69     | 4.36     | 4.66     | 4.6     |
| P50502  | ST13         | 5.37     | 5.98     | 4.65     | 5.3     | O15127  | SCAMP2       | 8.46     | 8.1      | 4.64     | 7.1     | P11047  | LAMC1          | 10.16    | 9.96     | 4.64     | 8.3     |
| O43657  | TSPAN6       | 4.47     | 6.14     | 4.64     | 5.1     | Q9HR7   | C2orf44      | 7.66     | 4.34     | 4.64     | 5.5     | Q9H9J2  | MRPL44         | 4.54     | 4.68     | 4.64     | 4.6     |
| P78406  | RAE1         | 11.19    | 14.84    | 4.62     | 10.2    | Q9BW92  | TARS2        | 4.37     | 5.14     | 4.62     | 4.7     | O76021  | RSL1D1         | 4.45     | 10.62    | 4.62     | 6.6     |
| P55209  | NAP1L1       | 4.6      | 5.13     | 4.62     | 4.8     | O75164  | KDM4A        | 4.44     | 7.27     | 4.61     | 5.4     | P31943  | HNRNPH1        | 5.34     | 4.93     | 4.62     | 5.0     |
| Q96KR1  | ZFR          | 4.6      | 5.06     | 4.61     | 4.8     | Q96KG9  | SCYL1        | 12.93    | 5.86     | 4.6      | 7.8     | P55786  | NPEPPS         | 4.26     | 4.47     | 4.61     | 4.4     |
| Q8TEX9  | IPO4         | 5.14     | 5.73     | 4.6      | 5.2     | P35613  | BSG          | 4.44     | 5.15     | 4.58     | 4.7     | Q95248  | SBF1           | 14.29    | 15       | 4.58     | 11.3    |
| Q8NS12  | ARRDC1       | 15       | 15       | 4.57     | 11.5    | Q9NS87  | KIF15        | 15       | 15       | 4.56     | 11.5    | Q9NR28  | DIABLO         | 8.28     | 5.42     | 4.57     | 6.1     |
| P49790  | NUP153       | 5.62     | 7.46     | 4.56     | 5.9     | Q14839  | CHD4         | 4.05     | 8.15     | 4.55     | 5.6     | Q9NZ18  | IGT2BP1        | 5.93     | 5.05     | 4.56     | 5.2     |
| P27797  | CALR         | 5.6      | 5.92     | 4.55     | 5.4     | O94806  | PRKD3        | 5.17     | 15       | 4.54     | 8.2     | P55795  | HNRNPH2        | 5.26     | 4.45     | 4.55     | 4.8     |
| P30041  | PRDX6        | 4.83     | 6.08     | 4.54     | 5.2     | Q07021  | C1QBP        | 4.64     | 5.72     | 4.51     | 5.0     | Q14566  | MCM6           | 4.83     | 5.33     | 4.54     | 4.9     |
| Q8NSC6  | SRBD1        | 6.66     | 5.35     | 4.51     | 5.5     | P54577  | YARS         | 4.06     | 4.66     | 4.49     | 4.4     | Q9P260  | KIAA1468       | 4        | 15       | 4.49     | 7.8     |
| P40939  | HADHA        | 4.53     | 4.76     | 4.48     | 4.6     | P12081  | HARS         | 6.19     | 7.68     | 4.47     | 6.1     | P41223  | BUD31          | 4.37     | 9.59     | 4.47     | 6.1     |
| P57737  | CORO7        | 6.43     | 15       | 4.46     | 8.6     | P60510  | PPP4C        | 5.71     | 4.97     | 4.46     | 5.0     | O75955  | FLOT1          | 13.69    | 11.64    | 4.46     | 9.9     |
| Q92890  | UFD1L        | 15       | 15       | 4.45     | 11.5    | P49821  | NDUFV1       | 4.27     | 5.98     | 4.45     | 4.9     | Q9Y4Z0  | LSMA           | 6.22     | 11.67    | 4.45     | 7.4     |
| P49591  | SARS         | 4.17     | 5.87     | 4.45     | 4.8     | P61313  | RPL15        | 6.22     | 5.63     | 4.44     | 5.4     | Q01968  | OCLR           | 5.2      | 9.6      | 4.44     | 6.4     |
| Q05M27  | SMEK2        | 4.86     | 7.96     | 4.43     | 5.8     | P25205  | MCM3         | 4.41     | 5.94     | 4.38     | 4.9     | Q15393  | SF3B3          | 4.41     | 4.78     | 4.43     | 4.5     |
| Q12931  | TRAP1        | 4.54     | 4.92     | 4.38     | 4.6     | Q6UW68  | TMEM205      | 10.54    | 15       | 4.37     | 10.0    | Q6PKG0  | LARP1          | 11.5     | 4.7      | 4.38     | 6.9     |
| Q13506  | NAB1         | 15       | 15       | 4.36     | 11.5    | Q07065  | CKAP4        | 4.42     | 5        | 4.35     | 4.6     | Q9Y5Q9  | GTF3C3         | 5.39     | 15       | 4.35     | 8.2     |
| P10155  | TROVE2       | 4.37     | 4.67     | 4.35     | 4.5     | P63027  | VAMP2        | 8.18     | 8.42     | 4.34     | 7.0     | J3QRU4  | Incharacterize | 8.18     | 8.42     | 4.34     | 7.0     |
| O00411  | POLRMT       | 4.34     | 4.57     | 4.34     | 4.4     | P49792  | RANBP2       | 4.48     | 4.32     | 4.33     | 4.4     | Q99666  | RGPD6          | 4.47     | 7.02     | 4.33     | 5.3     |
| Q12789  | GTF3C1       | 4.58     | 5.85     | 4.32     | 4.9     | P13010  | XRCC5        | 4.53     | 4.55     | 4.32     | 4.5     | Q86UE4  | MTDH           | 4.26     | 5.45     | 4.32     | 4.7     |
| O15417  | TNRC18       | 4.61     | 15       | 4.31     | 8.0     | Q9H7X7  | RABL5        | 12.93    | 15       | 4.29     | 10.7    | Q96T21  | SECISBP2       | 15       | 15       | 4.3      | 11.4    |
| P28331  | NDUFS1       | 4.25     | 4.53     | 4.29     | 4.4     | Q92879  | CELF1        | 4.91     | 12.93    | 4.26     | 7.4     | P14859  | POU2F1         | 4.62     | 4.19     | 4.28     | 4.4     |
| P52907  | CAPZA1       | 9.25     | 10.63    | 4.26     | 8.0     | P61026  | RAB10        | 9.19     | 15       | 4.25     | 9.5     | Q9H2U1  | DHX36          | 4.12     | 5.37     | 4.26     | 4.6     |
| Q6P1X5  | TAF2         | 9.36     | 10.19    | 4.25     | 7.9     | O60783  | MRPS14       | 14.93    | 14.63    | 4.24     | 11.3    | Q6P1N9  | TATDN1         | 15       | 15       | 4.24     | 11.4    |
| Q9BSJ8  | ESYT1        | 4.15     | 6.71     | 4.24     | 5.0     | Q96D46  | NMD3         | 4.62     | 10.56    | 4.2      | 6.5     | Q9H6E5  | TUT1           | 15       | 8.64     | 4.22     | 9.3     |
| P59998  | ARPC4        | 4.38     | 5.39     | 4.2      | 4.7     | P62906  | RPL10A       | 4.2      | 5.26     | 4.19     | 4.6     | Q14669  | TRIP12         | 15       | 4.96     | 4.2      | 8.1     |
| Q7Z6Z7  | HUWE1        | 4.27     | 4.71     | 4.19     | 4.4     | P30044  | PRDX5        | 5.72     | 11.25    | 4.18     | 7.1     | O75843  | AP1G2          | 8.99     | 4.58     | 4.19     | 5.9     |
| O43432  | EIF4G3       | 6.53     | 7.5      | 4.18     | 6.1     | O00244  | ATOX1        | 9.64     | 6.03     | 4.17     | 6.6     | Q96RP9  | GFM1           | 11.43    | 6.33     | 4.18     | 7.3     |
| Q5T4S7  | UBR4         | 4.31     | 5.94     | 4.17     | 4.8     | Q8NOV3  | RBFA         | 15       | 15       | 4.16     | 11.4    | Q96CN7  | ISOC1          | 4.68     | 4.18     | 4.17     | 4.3     |
| Q9H444  | RNPEP        | 4.7      | 4.48     | 4.15     | 4.4     | P00505  | GOT2         | 4.08     | 5.72     | 4.13     | 4.4     | Q3V6T2  | CCDC88A        | 15       | 8.43     | 4.13     | 9.2     |
| P53396  | ACLY         | 4.1      | 4.95     | 4.13     | 4.4     | P52888  | THOP1        | 6.03     | 6.79     | 4.12     | 5.6     | P13798  | APEH           | 5.09     | 8.54     | 4.12     | 5.9     |
| O00764  | PDXK         | 6.43     | 6.31     | 4.12     | 5.6     | P56537  | EIF6         | 6.16     | 4.85     | 4.12     | 5.0     | Q5JVF3  | PCID2          | 8.02     | 6.18     | 4.12     | 6.1     |
| P62249  | RPS16        | 4.35     | 6.14     | 4.09     | 4.9     | Q9Y3S1  | WNK2         | 5.1      | 14.64    | 4.08     | 7.9     | O43809  | NUDT21         | 4.23     | 5.74     | 4.09     | 4.7     |
| O60610  | DIAPH1       | 8.21     | 9.27     | 4.08     | 7.2     | P14868  | DARS         | 4.24     | 4.25     | 4.08     | 4.2     | P26196  | DDX6           | 4.26     | 4.33     | 4.08     | 4.2     |
| Q9Y2A7  | NCKAP1       | 5.21     | 4.22     | 4.08     | 4.5     | P11274  | BCR          | 15       | 15       | 4.06     | 11.4    | P53801  | PTTG1IP        | 4.47     | 15       | 4.07     | 7.8     |
| Q12792  | TWF1         | 4.48     | 6.12     | 4.06     | 4.9     | P08758  | ANXA5        | 4.22     | 4.61     | 4.06     | 4.3     | P14618  | PKM            | 4.84     | 4.71     | 4.06     | 4.5     |
| P35237  | SERPINB6     | 7.73     | 15       | 4.05     | 8.9     | Q99733  | NAP1L4       | 6.27     | 5.16     | 4.04     | 5.2     | Q9C073  | FAM117A        | 15       | 15       | 4.04     | 11.3    |
| A5YKK6  | CNOT1        | 4.13     | 4.52     | 4.03     | 4.2     | Q14789  | GOLGB1       | 7.34     | 5.9      | 4.01     | 5.8     | P55011  | SLC12A2        | 6.38     | 11.04    | 4.01     | 7.1     |
| P14923  | JUP          | 15       | 4.3      | 4.01     | 7.8     |         |              |          |          |          |         |         |                |          |          |          |         |

| Supplementary table 2: Identification of the sites of HNE modification by TOP-ABPP |              |             |                                                             |         |              |             |                                                                       |
|------------------------------------------------------------------------------------|--------------|-------------|-------------------------------------------------------------|---------|--------------|-------------|-----------------------------------------------------------------------|
| Cysteines                                                                          |              |             |                                                             |         |              |             |                                                                       |
| uniprot                                                                            | protein name | site number | peptide                                                     | uniprot | protein name | site number | peptide                                                               |
| Q9Y6C9                                                                             | MTCH2        | 49          | R.QVC*QLPGLFSY<br>AQHIASIDGR.R                              | Q9Y6E2  | BZW2         | 97          | K.MTNHC*VFSANED<br>HETIR.N                                            |
| Q9Y5U8                                                                             | MPC1         | 83          | R.NWLLFAC*HATN<br>EVAQLIQGGR.L                              | Q9Y673  | ALG5         | 194         | K.GLNDLQWPWNQM<br>AIAC*GSR.A                                          |
| Q9Y5M8                                                                             | SRPRB        | 73          | R.AVLLVGLC*DSG<br>K.T                                       | Q9Y5S9  | RBM8A        | 149         | K.EAQAAMEGLNGQ<br>DLMGQPISVDWC*F<br>VR.G                              |
| Q9Y5M8                                                                             | SRPRB        | 100         | R.DTQTSITDSC*AV<br>YR.V                                     | Q9Y5M8  | SRPRB        | 179         | K.NTPSFLIAC*NK.Q                                                      |
| Q9Y3D0                                                                             | MIP18        | 93          | R.VQVSDPESTVAV<br>AFTPTIPHC*SMAT<br>LIGLSIK.V               | Q9Y3D0  | MIP18        | 158         | R.VAAALENTHLLEV<br>VNQC*LSAR.S                                        |
| Q9Y383                                                                             | LC7L2        | 348         | R.FRQDQLASC*DR<br>.D                                        | Q9Y3C8  | UFC1         | 116         | K.IC*LTDHFKPLWAR<br>.N                                                |
| Q9Y277                                                                             | VDAC3        | 36          | K.SC*SGVEFSTSG<br>HAYTDTGKA                                 | Q9Y333  | LSM2         | 26          | K.NDLSIC*GTLHSVD<br>QYLNLIK.L                                         |
| Q9Y266                                                                             | NUDC         | 188         | R.WTQTLSELDAV<br>PFC*VNFR.L                                 | Q9Y271  | CLTR1        | 335         | R.LSTFRKHSLSVT<br>YVPRKKASLPEKGE<br>EIC*K.V                           |
| Q9UPQ7                                                                             | PZRN3        | 161         | R.AGGHC*CARALR<br>AHNGALQARLGA<br>HK.A                      | Q9Y263  | PLAP         | 605         | K.AINC*PEDIVFPALD<br>ILR.L                                            |
| Q9UL52                                                                             | TM11E        | 369         | R.MLCAGSLEGKT<br>DAC*QGDSGGPLV<br>SSDAR.D                   | Q9UN16  | DUS12        | 23          | R.VSC*AGQMLEVQP<br>GLYFGAAVAEPD<br>HLR.E                              |
| Q9UKP6                                                                             | UR2R         | 362         | R.CSGRSLSSC*SP<br>QPTDSLVLAPAAP<br>ARPAPEGPRAPA.-           | Q9UKX3  | MYH13        | 909         | R.C*EGLIKSILLEAK<br>VKELTER.L                                         |
| Q9UKF6                                                                             | CPSF3        | 498         | R.NFNHYHILSPC*DL<br>SNYTDLAMSTVK.Q                          | Q9UKP6  | UR2R         | 354         | R.C*SGRSLSSCSPQ<br>PTDSLVLAPAAPARP<br>APEGPRAPA.-                     |
| Q9UI30                                                                             | TR112        | 100         | R.TMHLLLEVEVI<br>EGTLQC*PESGR.M<br>K.FIC*HVVGITYQHI<br>DR.W | Q9UI30  | TR112        | 33          | R.IC*PVEFNPNFVAR<br>.M                                                |
| Q9UBQ5                                                                             | EIF3K        | 143         | R.HAELIASTFVDQ<br>C*K.T                                     | Q9UBV8  | PEF1         | 247         | R.FIQVC*TQLQVLTE<br>AFR.E                                             |
| Q9UBB4                                                                             | ATX10        | 283         | R.DDKC*ANLFEAL<br>VGTLK.A                                   | Q9UBM1  | PEMT         | 70          | R.SHC*FTQAMLSQP<br>R.M                                                |
| Q9P1F3                                                                             | ABRAL        | 39          | K.LLDVTC*SSLSVT<br>QEEAEELLQALHR.<br>L                      | Q9P2X0  | DPM3         | 67          | R.VATFHDC*EDAAR.<br>E                                                 |
| Q9P000                                                                             | COMD9        | 47          | R.AVC*MLSNTTAIA<br>EAWAR.L                                  | Q9P0L0  | VAPA         | 60          | R.RYC*VRPNNGIIDP<br>GSTVTVSVMLQPFD<br>YDPNEK.S                        |
| Q9NY65                                                                             | TBA8         | 376         | K.NYLPAINGIVFLV<br>DC*ADHSR.L                               | Q9NYL9  | TMOD3        | 132         | K.VSLDPELEEAL TSA<br>SDTELC*DLAAILGM<br>HNLITNTK.F                    |
| Q9NR31                                                                             | SAR1A        | 102         | K.EADQKEQFSQG<br>SPSNC*LETSLAEIF<br>PLGK.N                  | Q9NUQ9  | FA49B        | 10          | K.VLTC*TDLEQGPN<br>FFLDFENAQPTSEK<br>EIYNQVNVVLK.D                    |
| Q9NQ88                                                                             | TIGAR        | 161         | R.AC*PGPPPPSPE<br>PLAR.L                                    | Q9NQC3  | RTN4         | 1101        | K.YSNSALGHVNC*TI<br>K.E                                               |
| Q9HB09                                                                             | B2L12        | 266         | R.SLLC*GEDEAAD<br>ENPESQEMLEEQL<br>VR.M                     | Q9HCC0  | MCCB         | 216         | K.NIAQIAVVMGSC*T<br>AGGAYVPAMADENII<br>VR.K                           |
| Q9HAV4                                                                             | XPO5         | 941         | K.DHVFLC*EGEEP<br>K.S                                       | Q9HAV4  | XPO5         | 451         | R.LAC*RLDPK.T                                                         |
| Q9H910                                                                             | HN1L         | 118         | K.KSCPYC*PATFE<br>TGVGLSNHVR.G                              | Q9H936  | GHC1         | 271         | R.GVNEDTYSGILDC*<br>AR.K                                              |
| Q9H582                                                                             | ZN644        | 968         | K.GNVDGVAATPTA<br>ASASC*QYR.C                               | Q9H773  | DCTP1        | 162         | R.KYTELPHGAISED<br>QAVGPADIPC*DSTG<br>QTST.-                          |
| Q9H2C2                                                                             | ARV1         | 30          | K.VHLC*AAQLLQL<br>TNLEHDVYER.L                              | Q9H3P7  | GCP60        | 129         | K.QVLMGPYNPDC*<br>PEVGFDFVLGNDR.R                                     |
| Q9H0E3                                                                             | SP130        | 951         | K.MLQPC*GPPADK<br>PEEN.-                                    | Q9H1K1  | ISCU         | 95          | K.TFGC*GSAISSL<br>ATEWVK.G                                            |
| Q9BWJ5                                                                             | SF3B5        | 76          | R.ENPVVPIGC*LAT<br>AAALTYGLYSFHR.<br>K.RQKTGRFATAEE         | Q9BXW7  | CECR5        | 392         | R.DLC*FSPGLMEAS<br>HVVDVNEAVQLVF<br>R.DSYC*SYMGHFDL<br>LNYFAIAENESK.A |
| Q9BW72                                                                             | HIG2A        | 53          | IAMLC*VYLASDES<br>AYVTGNPVIIDGG<br>K.LEVDAIVNAANS           | Q9BWJ5  | SF3B5        | 41          | K.EADASPASAGIC*R<br>.I                                                |
| Q9BUT1                                                                             | BDH2         | 221         | SLLGGGGVDGC*IH                                              | Q9BW27  | NUP85        | 230         | R.SLWSSLC*LGPAP<br>APPGVPSPEGR.L                                      |
| Q9BQ69                                                                             | MACD1        | 186         |                                                             | Q9BRR6  | ADPGK        | 40          |                                                                       |

| uniprot | protein name | site number | peptide                                                   | uniprot    | protein name | site number | peptide                                                                 |
|---------|--------------|-------------|-----------------------------------------------------------|------------|--------------|-------------|-------------------------------------------------------------------------|
| Q9BPW8  | NIPS1        | 106         | K.LHLDDEDYPC*SL<br>VGNWNTWYGEQD<br>QAVHLWR.F              | Q9BQ67     | GRWD1        | 11          | R.TC*ETGEPMEAES<br>GDTSSSEGAQVYLP<br>GR.G                               |
| Q99832  | TCPH         | 29          | K.EGTDSSQGIPQL<br>VSNISAC*QVIAEAV<br>R.T                  | Q99832     | TCPH         | 450         | R.QLC*DNAGFDATNI<br>LNK.L                                               |
| Q99643  | C560         | 107         | K.SLC*LGPAIHITA<br>K.F                                    | Q99832     | TCPH         | 511         | R.INALTAASEAAC*LI<br>VSVDETIKNPR.S                                      |
| Q96HS1  | PGAM5        | 12          | R.QALQLAAC*GLA<br>GGSAAVLFSAVAV<br>GKPR.A                 | Q96KB5     | TOPK         | 22          | K.SVLC*STPTINIPAS<br>PFMQK.L                                            |
| Q96FZ5  | CKLF7        | 12          | R.TTC*SSGSALGP<br>GAGAAQPSASPLE<br>GLLDLSYPR.T            | Q96GX2     | A7L3B        | 75          | R.LPLC*SLPGEPGN<br>GPDQQLQR.S                                           |
| Q96ER3  | SAAL1        | 163         | R.LLLTC*LSQAEVA<br>SVWVER.I                               | Q96FW1     | OTUB1        | 23          | K.QEPLGSDSEGVN<br>C*LAYDEAIMAQQDR                                       |
| Q93008  | USP9X        | 193         | K.FHIYNGTRPC*ES<br>VSSSVQLPEDEL<br>AR.S                   | Q96DE5     | APC16        | 55          | R.FLC*ESVFSYQVA<br>STLK.Q                                               |
| Q92973  | TNPO1        | 164         | K.IC*EDSAEILDSD<br>VLDRLNIMIPK.F                          | Q92973     | TNPO1        | 205         | R.SHAVAC*VNQFIIS<br>R.T                                                 |
| Q92841  | DDX17        | 584         | R.TTSSANNPNLMY<br>QDEC*DRR.L                              | Q92973     | TNPO1        | 103         | K.SEC*LNNIGDSSPL<br>IR.A                                                |
| Q92530  | PSMF1        | 185         | R.QPPWC*DPLGP<br>FVVGGEDLDPFGP<br>R.R                     | Q92824     | PCSK5        | 696         | R.KCAPNCESC*FGS<br>HGDQCMSC.Y                                           |
| Q8WTT2  | NOC3L        | 683         | K.TDLLLLDSESQGS<br>GVFLPELDEPEYC*<br>NAQNTALWELHAL<br>R.R | Q8WUW<br>1 | BRK1         | 43          | K.IADFLNSFDMSC*R<br>.S                                                  |
| Q8TE60  | ATS18        | 638         | R.IYQLC*NINPC*N<br>ENSLDFR.A                              | Q8TEX9     | IPO4         | 350         | K.LC*PQLMPMLEEA<br>LR.S                                                 |
| Q8TD08  | MK15         | 346         | R.VYQMILEC*GGS<br>SGTSREK.G                               | Q8TDB4     | HUMMR        | 139         | K.EASAC*PGHVEAA<br>PETTAVSAETGPEVT<br>DAAAR.E                           |
| Q8NFC6  | BD1L1        | 2427        | K.PSAGQGHP<br>SAVC*AEKEEK.H                               | Q8TCT9     | HM13         | 326         | K.HAQPALLYLVPAC*<br>IGFPVLVALAK.G                                       |
| Q8N5K1  | CISD2        | 92          | K.VVNEINIEDLC*L<br>TK.A                                   | Q8NB37     | PDDC1        | 94          | R.YHALLIPSC*PGAL<br>TDLASSGLAR.I                                        |
| Q8IZL8  | PELP1        | 645         | R.VPPLQPMGPTC*<br>PTPAPVPPPEAPS<br>PFR.A                  | Q8N1E2     | LYG1         | 49          | R.RHGLNYC*GVR.A                                                         |
| Q8IUR0  | TPPC5        | 40          | R.TEVLSAFALLFS<br>ELVQHC*QSR.V                            | Q8IXH7     | NELFD        | 195         | K.LISDAGYQGEITSV<br>STAC*QQLVFSR.V                                      |
| Q86UY8  | NT5D3        | 27          | R.AATAAALRGGC*<br>GTAAR.G                                 | Q8IUR0     | TPPC5        | 139         | K.ENSTLNC*ASFTA<br>GIVEAVLTHSGFFAK.<br>R.AGAVVAVPTDTLY                  |
| Q86U90  | YRDC         | 20          | R.ADHQPLTEASYV<br>NLPTIALC*NTDSPL<br>R.Y                  | Q86U90     | YRDC         | 99          | GLACAASC*SAALR.<br>A                                                    |
| Q7Z7E8  | UB2Q1        | 106         | R.IHC*NITESYPAV<br>PPIWSVESDDPNL<br>AAVLER.L              | Q7Z7H8     | RM10         | 64          | K.LMAVTEYIPPKPAI<br>HPSC*LSPSPSPQE<br>EIGLIR.L                          |
| Q7L1Q6  | BZW1         | 35          | R.FDPTQFQDC*IIQ<br>GLTETGTDLEAVA<br>K.F                   | Q7L2H7     | EIF3M        | 134         | K.VAASC*GAIQYIPT<br>ELDQVRK.W                                           |
| Q7L0Y3  | MRRP1        | 78          | K.SSVQEEC*VSTIS<br>SSKDEDPLAATR.E                         | Q7L1Q6     | BZW1         | 96          | R.TDVC*VFAAQEDL<br>ETMQAFAQVFNK.L                                       |
| Q71U36  | TBA1A        | 129         | R.KLADQC*TGLQG<br>FLVFHSGGGTGS<br>GFTSLLMER.L             | Q7L014     | DDX46        | 501         | K.RGAEIIVC*TPGRM<br>IDMLAANSRVRTNLR<br>RVTYVVLDEADR.M                   |
| Q6QNY1  | BL1S2        | 41          | R.SDEPARDDAAV<br>ETAEEAKEPAEADI<br>TELC*R.D               | Q6ZMG9     | CERS6        | 236         | R.VGTLVLC*LHDSA<br>DALLEAAK.M                                           |
| Q6P996  | PDXD1        | 206         | R.VPC*NTVFGSQH<br>QMDVAFLEK.L                             | Q6PJG6     | BRAT1        | 673         | R.THC*PYAVALPEV<br>APAQPLTEALR.A                                        |
| Q6NUJ1  | SAPL1        | 187         | R.QAPEGALCQDC*<br>VR.Q                                    | Q6P161     | RM54         | 62          | K.GAVTSEALKDPDV<br>C*TDPVQLTTYAMGV<br>NIYK.E                            |
| Q6ICB0  | DES11        | 108         | R.GEAYNLFEHNC*<br>NTFSNEVAQFLTG<br>K.HFLSDTGMAC*R<br>.S   | Q6IS14     | IF5AL        | 129         | K.EIEQKYDC*GEEILI<br>TVLSAMTEEAAVAIK.<br>R.RKSQETKC*TKRA<br>LPKKSQVLK.S |
| Q5TFE4  | NT5D1        | 119         | K.ILTDEMILLQAC*E<br>GR.T                                  | Q69YH5     | CDCA2        | 547         | K.ALC*IDQLDVLQK.<br>E                                                   |
| Q5T310  | GPTC4        | 152         | K.KLEDDRNSLQAA<br>KAGLEDEC*K.T                            | Q5T8P6     | RBM26        | 53          | K.EDNYDTHNC*DDA<br>NQDK.K                                               |
| Q5JRA6  | MIA3         | 1513        | R.SDVC*TPGGTTIY<br>GLHALEQGGRLR.A                         | Q5SQS8     | CJ120        | 220         | R.FLC*LEFSQVNNPL<br>ISR.L                                               |
| Q53H96  | P5CR3        | 235         |                                                           | Q5HYK3     | COQ5         | 244         |                                                                         |

| uniprot | protein name | site number | peptide                                             | uniprot | protein name | site number | peptide                                                    |
|---------|--------------|-------------|-----------------------------------------------------|---------|--------------|-------------|------------------------------------------------------------|
| Q4KMP7  | TB10B        | 590         | R.NLPQQC*MQED<br>FLVHEVTNLPVTEA<br>LIER.E           | Q4VCS5  | AMOT         | 647         | R.QGNC*QPTNVSEY<br>NAAALMELLR.E                            |
| Q3B820  | F161A        | 426         | R.C*PTPDFEDLPE<br>RYQK.H                            | Q4AE62  | GTDC1        | 101         | K.KILYFHENQLIYPV<br>KKC*QER.D                              |
| Q15365  | PCBP1        | 194         | R.VMTIPYQMPAS<br>SPVIC*AGGQDR.C                     | Q16576  | RBBP7        | 97          | R.VHIPNDDAQFDAS<br>HC*DSDKGEFGGFG<br>SVTGG.I               |
| Q15031  | SYLM         | 225         | K.EALVNWDVPDQ<br>TVLANEQVDEHGC<br>*SWR.S            | Q15185  | TEBP         | 58          | K.HLNEIDL FHC*IDP<br>NDSK.H                                |
| Q14C86  | GAPD1        | 1129        | R.LALC*SADSVAF<br>PVLTHSTR.N                        | Q15003  | CND2         | 418         | R.TMC*PLLSMKPGE<br>YSYFSPR.T                               |
| Q14964  | RB39A        | 41          | R.SPAC*DPTVGVD<br>FFSR.L                            | Q14974  | IMB1         | 689         | R.ALQSNII PFC*DEV<br>MQLLLENLGNENVH<br>R.SPRC*SRRPGGSR     |
| Q14671  | PUM1         | 1102        | R.AVLIDEVC*TMN<br>DGPHSALYTMMK.<br>K.ALC*HLNVPVTV   | Q14964  | RB39A        | 4           | LR.G                                                       |
| Q14232  | EI2BA        | 169         | VLDAAVGYIMEK.A<br>K.KGAGNPQASTLA                    | Q14667  | K0100        | 1707        | R.C*NCRMYISYSH<br>DIDPELATQIK.P<br>R.TVAISDAAQLPHD         |
| Q13428  | TCOF         | 1298        | LQSNITQC*LLGQP<br>WPLNEAQVQASVV<br>K.SPWLAGNELTVA   | Q13542  | 4EBP2        | 35          | GGTR.I                                                     |
| Q13155  | AIMP2        | 291         | DVVLWSVLQQIGG<br>C*SVTVPANVQR.<br>R.VHTVMTLEQQD     | Q13158  | FADD         | 98          | R.RVDDFEAGAAAG<br>AAPGEEDLC*AAFNV<br>ICDNVKGDW.R.R         |
| Q12905  | ILF2         | 311         | MVC*YTAQTLVR.I<br>K.SAC*SLESNLEG<br>LAGVLEADLPNYK.  | Q12996  | CSTF3        | 628         | K.LLPPPIC*FQGGPFV<br>QVDELMEIFR.R                          |
| Q09161  | NCBP1        | 44          | K.HGEVC*PAGWK<br>PGSDTIKPDVQK.S<br>R.LNAIC*AQVIPFL  | Q12874  | SF3A3        | 103         | R.KHPNEIC*VPM SV<br>EFEELLK.A                              |
| Q06830  | PRDX1        | 173         | K.HGEVC*PAGWK<br>PGSDTIKPDVQK.S<br>R.LNAIC*AQVIPFL  | Q07065  | CKAP4        | 100         | K.SSSSSASAAAAA<br>AAASSSASC*SR.R                           |
| Q04727  | TLE4         | 95          | SQEHQQVVQAV<br>ER.A                                 | Q06830  | PRDX1        | 83          | K.LNCQVIGASVDSH<br>FC*HLAWVNTPK.K                          |
| Q02338  | BDH          | 288         | K.METYC*SSGSTD<br>TSPVIDAVTHALTA<br>TPYTR.Y         | Q04724  | TLE1         | 89          | R.LNTIC*AQVIPFLSQ<br>EHQQVVAQAVR.A                         |
| Q00839  | HNRPU        | 648         | K.GNFTLPEVAEC*<br>FDEITYVELQK.E                     | Q01469  | FABP5        | 120         | K.LVVEC*VMNNVTC<br>TR.I                                    |
| P84085  | ARF5         | 62          | K.NIC*FTVWDVGG<br>QDK.I                             | P84243  | H33          | 111         | R.FQSSAIGALQEAS<br>EAYLVGLFEDTNLC*<br>AIHAK.R              |
| P78371  | TCPB         | 395         | R.SLHDALC*VLAQ<br>TVK.D                             | P82912  | RT11         | 186         | R.LSAMHGLIMGGLE<br>VISITDNTPIPHNGC*<br>RPR.K               |
| P68366  | TBA4A        | 347         | R.SIQFVDWC*PTG<br>FK.V                              | P68431  | H31          | 111         | R.FQSSAVMALQEAC<br>EAYLVGLFEDTNLC*<br>AIHAK.R              |
| P68104  | EF1A1        | 234         | R.KDGNASGTTLLE<br>ALDC*ILPPTRPD<br>KPLR.L           | P68104  | EF1A1        | 411         | K.SGDAAIVDMVPGK<br>PMC*VESFSDYPLG<br>R.F                   |
| P67936  | TPM4         | 247         | K.EENVGLHQTLDQ<br>TLNELNC*1.-                       | P68036  | UB2L3        | 86          | K.GQVC*LPVISAEN<br>WKPATK.T                                |
| P63167  | DYL1         | 24          | K.NADMSEEMQQD<br>SVEC*ATQALEK.Y                     | P63279  | UBC9         | 138         | K.QILLGIQELLNEPNI<br>QDPAQAEAYTIYC*Q<br>NR.V               |
| P62910  | RL32         | 91          | K.ELEVLLMC*NK.S                                     | P62910  | RL32         | 96          | K.SYC*AEIAHNVSSK<br>N                                      |
| P62753  | RS6          | 12          | K.LNISFPATGC*QK<br>L                                | P62829  | RL23         | 28          | R.ISLGLPVGAVINC*<br>ADNTGAK.N                              |
| P62333  | PRS10        | 228         | R.DHQPC*IIFMDEI<br>DAIGRR.F                         | P62633  | CNBP         | 97          | R.EQC*CYNCGKPG<br>HLAR.D                                   |
| P62304  | RUXE         | 46          | R.IEGC*IIGFDEYM<br>NLVLDDAEEIHSK.<br>K.NMSVHLSPC*FR | P62316  | SMD2         | 46          | K.NNTQVLINC*R.N                                            |
| P62280  | RS11         | 116         | D                                                   | P62280  | RS11         | 131         | R.DVQIGDIVTVGEC*<br>RPLSK.T                                |
| P62258  | 1433E        | 98          | K.LICC*DILDVLDK.<br>H                               | P62266  | RS23         | 90          | K.ITAFVPNDGC*LNFI<br>EENDEVLVAGFGR.K<br>K.IIPTLEEGQLPSPSPT |
| P61619  | S61A1        | 13          | K.FLEVIK PFC*VILP<br>EIQKPER.K                      | P61978  | HNRPK        | 132         | ATSQPLPESDAVEC*<br>LNYQHYK.G                               |
| P61247  | RS3A         | 96          | K.NC*LTNFHGMDL<br>TR.D                              | P61289  | PSME3        | 92          | R.RLDEC*EEAFQGT<br>K.V                                     |
| P61218  | RPAB2        | 76          | R.ALQIAMC*APVM<br>VELEGETDPLLIAM<br>K.E             | P61247  | RS3A         | 201         | K.AC*QSIYPLHDFV<br>R.K                                     |
| P60981  | DEST         | 135         | K.FQGIKHEC*QAN<br>GPEDLNR.A                         | P61106  | RAB14        | 40          | K.FMADC*PHTIGVEF<br>GTR.I                                  |

| uniprot | protein name | site number | peptide                                            | uniprot | protein name | site number | peptide                                         |
|---------|--------------|-------------|----------------------------------------------------|---------|--------------|-------------|-------------------------------------------------|
| P60709  | ACTB         | 272         | R.FRCPEALFQPSF<br>LGMESC*GIHETTF<br>NSIMK.C        | P60842  | IF4A1        | 134         | K.VVMALGDYMGAS<br>CHAC*IGGTNVR.A                |
| P60174  | TPIS         | 79          | K.VPADTEVVV*AP<br>PTAYIDFAR.Q                      | P60228  | EIF3E        | 141         | K.FQYEC*GNYSGAA<br>EYLYFFR.V                    |
| P56182  | RRP1         | 62          | K.GLFYC*MWMQD<br>KPLLQEELGR.T                      | P56192  | SYMC         | 66          | K.VPVLQLDSGNYLF<br>STSAIC*R.Y                   |
| P55060  | XPO2         | 853         | K.LLTEC*PPMMDT<br>EYTK.L                           | P55265  | DSRAD        | 392         | R.NAEFLTC*NIPTSN<br>ASNNMVTTEK.V                |
| P55060  | XPO2         | 325         | K.YDLLVSNAIQFLA<br>SVC*ERPHYK.N                    | P55060  | XPO2         | 344         | K.NLFEDQNTLTSIC*<br>EK.V                        |
| P53618  | COPB         | 623         | K.VLSEC*SPLMNDI<br>FNK.E                           | P55060  | XPO2         | 195         | K.ATIELC*STHANDA<br>SALR.I                      |
| P51991  | ROA3         | 85          | R.GFGFVTYSC*VE<br>EVDAAMCAR.P                      | P52306  | GDS1         | 64          | K.IQASGILQLFASLLT<br>PQSSC*K.A                  |
| P50991  | TCPD         | 450         | R.TLSGMESYC*VR<br>.A                               | P51570  | GALK1        | 322         | R.SLRDDYEVSC*PE<br>LDQLVEAALAVPGVY<br>GSR.M     |
| P50990  | TCPQ         | 187         | K.LIAQAC*VSIFPD<br>SGHFNVNIR.V                     | P50991  | TCPD         | 120         | K.AQDIEAGDGTTSV<br>VIIAGSLLDSC*TK.L             |
| P49411  | EFTU         | 147         | K.NMITGTAPLDGC<br>*ILVVAANDGMPQ<br>TR.E            | P49411  | EFTU         | 222         | R.ELLTEFGYKGEET<br>PVIVGSALC*ALEGR<br>DPELGLK.S |
| P49368  | TCPG         | 475         | R.AKHTQENC*ET<br>WGVNGETGTLVD<br>MK.E              | P49368  | TCPG         | 398         | R.NLQDAMQVC*R.N                                 |
| P49327  | FAS          | 2359        | K.LTPGC*EAEAET<br>EAICFFVQQFTDM<br>EHN.R.V         | P49368  | TCPG         | 213         | K.IPGGIIEDSC*VLR.<br>G                          |
| P49321  | NASP         | 708         | R.KPTDGASSNC*<br>VTDISHLVR.K                       | P49327  | FAS          | 1448        | K.AINC*ATSGVVGLV<br>NCLR.R                      |
| P48047  | ATPO         | 141         | R.GEVPC*TVTSAS<br>PLEEATLSELK.T                    | P48060  | GLIP1        | 192         | K.RGATC*SACPNND<br>KCLDNLVCVNR.Q                |
| P46782  | RS5          | 172         | K.TIAEC*LADELINA<br>AK.G                           | P46782  | RS5          | 155         | R.VNQAIVLLC*TGA<br>R.E                          |
| P46734  | MP2K3        | 29          | R.ISC*MSKPPAPN<br>PTPPR.N                          | P46776  | RL27A        | 70          | K.RNQSFC*PTVNLD<br>KLWTLVSEQTR.V                |
| P45880  | VDAC2        | 47          | K.SC*SGVEFSTSG<br>SSNTDTGK.V                       | P46060  | RAGP1        | 573         | K.ALAPLLLAFVTKPN<br>SALESC*SFAR.H               |
| P43487  | RANG         | 132         | R.AWVWNTHADFA<br>DEC*PKPELLAIR.F                   | P45880  | VDAC2        | 76          | K.WC*EYGLTFTEK.<br>W                            |
| P43246  | MSH2         | 822         | K.GVC*DQSGFIHV<br>AELANFPK.H                       | P43487  | RANG         | 99          | K.IC*ANHYYTPMMEL<br>KPNAGSDR.A                  |
| P41252  | SYIC         | 87          | R.FGWDC*HGLPV<br>EYEIDK.T                          | P41252  | SYIC         | 526         | R.ISEVFDC*WFESG<br>SMPYAQVHYPFENK               |
| P40227  | TCPZ         | 499         | K.IQAEHSESGQLV<br>GVDLNTGEPMVAA<br>EVGVWDNYC*VK.   | P40938  | RFC3         | 32          | R.NLVQC*GDFPHLL<br>VYGPSGAGK.K                  |
| P39210  | MPV17        | 59          | R.TLTMVSLGC*GF<br>VGPVVGWYK.V                      | P40222  | TXLNA        | 523         | R.VTEAPC*YPGAPS<br>TEASGQTGPQEPTS<br>AR.A       |
| P36578  | RL4          | 96          | R.SGQGAFGNMC*<br>R.G                               | P36578  | RL4          | 125         | R.YAIC*SALAASALP<br>ALVMSK.G                    |
| P35611  | ADDA         | 430         | K.YSDVEVPASVTG<br>YSFASDGDGSGTC*<br>SPLR.H         | P35998  | PRS7         | 270         | K.AC*LIFDFEIDAIGG<br>AR.F                       |
| P32119  | PRDX2        | 172         | R.LVQAFQYTDEH<br>GEVC*PAGWKPGS<br>DTIKPNVDDSK.E    | P35268  | RL22         | 25          | K.FTLDC*THPVEDGI<br>MDAANFEQFLQER.I             |
| P31153  | METK2        | 104         | K.TC*NVLVALEQQ<br>SPDIAQGVHLDR.N                   | P31949  | S10AB        | 91          | K.KLDTNSDGLDQDFS<br>EFLNLIGGLAMAC*H<br>DSFLK.A  |
| P30153  | 2AAA         | 294         | K.TDLVPAFQNLMK<br>DC*EAEVR.A                       | P30153  | 2AAA         | 377         | K.DNTIEHLLPLFLAQ<br>LKDEC*PEVR.L                |
| P30048  | PRDX3        | 229         | K.AFQYVETHGEVC<br>*PANWTPDSPTIKP<br>SPAASK.E       | P30084  | ECHM         | 62          | K.ALNALC*DGLIDEL<br>NQALK.T                     |
| P30040  | ERP29        | 157         | K.GQGYYLGMPGC<br>*LPVYDALAGEFIR.<br>R.KVAEPELMGTPD | P30041  | PRDX6        | 91          | K.DINAYNC*EEPTEK<br>LPFPIIDDR.N                 |
| P27708  | PYR1         | 1889        | GTC*YPPPPVPR.Q<br>R.YLAEVAC*GDDR<br>.K             | P28074  | PSB5         | 111         | K.VIEINPYLLGTMGAG<br>GAADC*SFWER.L              |
| P27348  | 1433T        | 134         | K.VPAFEGDDGFC*<br>VFESNAIAYYSNE<br>ELR.G           | P27635  | RL10         | 49          | K.VDEFPLC*GHMVS<br>DEYEQLSSEALEAA               |
| P26641  | EF1G         | 68          | R.LYQVEYAMEAIG<br>HAGTC*LGILANDG<br>VLLAER.R       | P26641  | EF1G         | 266         | K.KAAAPAPEEEMDE<br>C*EQALAAEPK.A                |
| P25789  | PSA4         | 34          |                                                    | P26599  | PTBP1        | 23          | R.GSDELFTSC*VTN<br>GPFIMSSNSASAAN<br>GNDSK.K    |

| uniprot | protein name | site number | peptide                                                                                                                                                                                                                                                                       | uniprot | protein name | site number | peptide                                                                                                                                                                                                                                                                       |
|---------|--------------|-------------|-------------------------------------------------------------------------------------------------------------------------------------------------------------------------------------------------------------------------------------------------------------------------------|---------|--------------|-------------|-------------------------------------------------------------------------------------------------------------------------------------------------------------------------------------------------------------------------------------------------------------------------------|
| P24534  | EF1B         | 50          | K.SYIEGYVPSQAD<br>VAVFEAVSSPPPA<br>DLC*HALR.W                                                                                                                                                                                                                                 | P25789  | PSA4         | 74          | K.LNEDMAC*SVAGIT<br>SDANVLTNELR.L                                                                                                                                                                                                                                             |
| P23921  | RIR1         | 492         | K.IIDINYPVPEAC*<br>LSNKR.H                                                                                                                                                                                                                                                    | P24468  | COT2         | 326         | K.AIVLFTSDAC*GLS<br>DVAHVESLQEK.S                                                                                                                                                                                                                                             |
| P22695  | QCR2         | 391         | K.AGYLMSVESSECC<br>*FLEEVGSQALVAG<br>SYMPPSTVLQQID<br>SVANADIINAAK.K<br>R.KC*GETAFIAPQ<br>CEMPIEIVVCR.R                                                                                                                                                                       | P23528  | COF1         | 139         | K.LTGIKHELQANC*Y<br>EEVKDR.C                                                                                                                                                                                                                                                  |
| P22234  | PUR6         | 81          | K.GTVLLADNVIC*P<br>GAPDFLAHVR.G                                                                                                                                                                                                                                               | P22314  | UBA1         | 1039        | R.ALVLLELC*CNDES<br>GEDVEVPYVR.Y<br>R.LPSGLGC*STVLSP<br>EGSAQFAAQIFGLSN<br>HLWWSK.L<br>K.ATC*APQHGAPGP<br>GPADASK.V                                                                                                                                                           |
| P21964  | COMT         | 223         | R.GGC*PGGEATLS<br>QPPPR.G                                                                                                                                                                                                                                                     | P22234  | PUR6         | 374         | K.VLC*ELADLQDK<br>EVGDGTTSVVIAA<br>ELLK.N                                                                                                                                                                                                                                     |
| P20290  | BTF3         | 22          | R.C*LPSIHPFK.L<br>R.QALVEFEDVLGA<br>C*NAVNYAADNQIY<br>IAGHPAFVNYSTSQ<br>K.EGIC*ALGGTSEL<br>SSEGTQHSYSEEE<br>K.Y                                                                                                                                                               | P21333  | FLNA         | 2543        | R.LMEPIYLVEIQC*<br>PEQVGGGIYGVLN<br>K.SKDYEFMWNPH<br>LGYILTC*PSNLGT<br>GLR.A                                                                                                                                                                                                  |
| P17987  | TCPA         | 76          | K.DLINEAC*WDISS<br>SGVNLQSMDSHV<br>SLVQLTLR.S<br>R.EGTIPKLTAKSN<br>C*R.Y                                                                                                                                                                                                      | P18085  | ARF4         | 62          | R.LVEGTINPGETC*<br>LIIEDVVTSGSSVLE<br>TVEVLQK.E<br>K.QTIGNSC*GTIGLI<br>HAVANNQDK.L<br>R.VLGAHILGPGAG<br>EMVNEAALALEYG<br>ASC*EDIAR.V<br>R.LVSSPC*CIVTST<br>YGWTANMER.I<br>R.LVTSPC*CIVTST<br>YGWTANMER.I<br>K.LSSC*DSFTSTIN<br>ELNHCLSLR.T<br>R.AGAIAPC*EVTVP<br>AQNTGLGPEK.T |
| P16050  | LOX15        | 378         | R.C*LPSIHPFK.L<br>R.QALVEFEDVLGA<br>C*NAVNYAADNQIY<br>IAGHPAFVNYSTSQ<br>K.EGIC*ALGGTSEL<br>SSEGTQHSYSEEE<br>K.Y                                                                                                                                                               | P17987  | TCPA         | 397         | R.SLHDALC*VVK.R                                                                                                                                                                                                                                                               |
| P14866  | HNRPL        | 151         | R.C*LPSIHPFK.L<br>R.QALVEFEDVLGA<br>C*NAVNYAADNQIY<br>IAGHPAFVNYSTSQ<br>K.EGIC*ALGGTSEL<br>SSEGTQHSYSEEE<br>K.Y                                                                                                                                                               | P15531  | NDKA         | 145         | K.EIGLWFHPEELVD<br>YTSC*AQNWIYE.-                                                                                                                                                                                                                                             |
| P13797  | PLST         | 104         | R.LMEPIYLVEIQC*<br>PEQVGGGIYGVLN<br>K.SKDYEFMWNPH<br>LGYILTC*PSNLGT<br>GLR.A                                                                                                                                                                                                  | P13995  | MTDC         | 145         | R.IC*NAVSPDKDVD<br>GFHVINVGR.M                                                                                                                                                                                                                                                |
| P13639  | EF2          | 751         | R.LMEPIYLVEIQC*<br>PEQVGGGIYGVLN<br>K.SKDYEFMWNPH<br>LGYILTC*PSNLGT<br>GLR.A                                                                                                                                                                                                  | P13639  | EF2          | 41          | K.STLTDLSLVC*K.A                                                                                                                                                                                                                                                              |
| P12277  | KCRB         | 283         | R.LMEPIYLVEIQC*<br>PEQVGGGIYGVLN<br>K.SKDYEFMWNPH<br>LGYILTC*PSNLGT<br>GLR.A                                                                                                                                                                                                  | P13639  | EF2          | 136         | R.VTDGALVVVDCVS<br>GVC*VQTETVLR.Q                                                                                                                                                                                                                                             |
| P12004  | PCNA         | 27          | K.DLINEAC*WDISS<br>SGVNLQSMDSHV<br>SLVQLTLR.S<br>R.EGTIPKLTAKSN<br>C*R.Y                                                                                                                                                                                                      | P12268  | IMDH2        | 331         | R.VGMGSGSIC*ITQE<br>VLACGRPQATAVYK.<br>V<br>K.LMDLDVEQLGIPE<br>QEYSC*VVK.M<br>R.ASVGAGFLYPLVG<br>TMSTMPGLPTRPC*F<br>YDIDLDPETEQVNGL<br>R.AAVEGIVLGGGC<br>*ALLR.C                                                                                                              |
| P11717  | MPRI         | 306         | R.LVEGTINPGETC*<br>LIIEDVVTSGSSVLE<br>TVEVLQK.E<br>K.QTIGNSC*GTIGLI<br>HAVANNQDK.L<br>R.VLGAHILGPGAG<br>EMVNEAALALEYG<br>ASC*EDIAR.V<br>R.LVSSPC*CIVTST<br>YGWTANMER.I<br>R.LVTSPC*CIVTST<br>YGWTANMER.I<br>K.LSSC*DSFTSTIN<br>ELNHCLSLR.T<br>R.AGAIAPC*EVTVP<br>AQNTGLGPEK.T | P12004  | PCNA         | 135         | R.VMVEEPSMNLE<br>WLYGC*PPPYHTFE<br>EPVYMK.S                                                                                                                                                                                                                                   |
| P11172  | UMPS         | 119         | R.LVEGTINPGETC*<br>LIIEDVVTSGSSVLE<br>TVEVLQK.E<br>K.QTIGNSC*GTIGLI<br>HAVANNQDK.L<br>R.VLGAHILGPGAG<br>EMVNEAALALEYG<br>ASC*EDIAR.V<br>R.LVSSPC*CIVTST<br>YGWTANMER.I<br>R.LVTSPC*CIVTST<br>YGWTANMER.I<br>K.LSSC*DSFTSTIN<br>ELNHCLSLR.T<br>R.AGAIAPC*EVTVP<br>AQNTGLGPEK.T | P11586  | C1TC         | 918         | R.LLMEQESSAC*SR.<br>R                                                                                                                                                                                                                                                         |
| P09936  | UCHL1        | 90          | R.LVEGTINPGETC*<br>LIIEDVVTSGSSVLE<br>TVEVLQK.E<br>K.QTIGNSC*GTIGLI<br>HAVANNQDK.L<br>R.VLGAHILGPGAG<br>EMVNEAALALEYG<br>ASC*EDIAR.V<br>R.LVSSPC*CIVTST<br>YGWTANMER.I<br>R.LVTSPC*CIVTST<br>YGWTANMER.I<br>K.LSSC*DSFTSTIN<br>ELNHCLSLR.T<br>R.AGAIAPC*EVTVP<br>AQNTGLGPEK.T | P10809  | CH60         | 442         | K.GLQGVGPGC*TDE<br>TLLSAIASALHTSTM<br>PITGQLSAAVEK.N                                                                                                                                                                                                                          |
| P09622  | DLDH         | 477         | R.LVEGTINPGETC*<br>LIIEDVVTSGSSVLE<br>TVEVLQK.E<br>K.QTIGNSC*GTIGLI<br>HAVANNQDK.L<br>R.VLGAHILGPGAG<br>EMVNEAALALEYG<br>ASC*EDIAR.V<br>R.LVSSPC*CIVTST<br>YGWTANMER.I<br>R.LVTSPC*CIVTST<br>YGWTANMER.I<br>K.LSSC*DSFTSTIN<br>ELNHCLSLR.T<br>R.AGAIAPC*EVTVP<br>AQNTGLGPEK.T | P09936  | UCHL1        | 152         | R.ENPDLAC*LQSIIF<br>DEERSPEEQAK.T                                                                                                                                                                                                                                             |
| P08238  | HS90B        | 589         | R.LVEGTINPGETC*<br>LIIEDVVTSGSSVLE<br>TVEVLQK.E<br>K.QTIGNSC*GTIGLI<br>HAVANNQDK.L<br>R.VLGAHILGPGAG<br>EMVNEAALALEYG<br>ASC*EDIAR.V<br>R.LVSSPC*CIVTST<br>YGWTANMER.I<br>R.LVTSPC*CIVTST<br>YGWTANMER.I<br>K.LSSC*DSFTSTIN<br>ELNHCLSLR.T<br>R.AGAIAPC*EVTVP<br>AQNTGLGPEK.T | P08670  | VIME         | 328         | K.HFAEAVNWC*DEG<br>LQIDAK.E<br>R.GIDQC*IPLFVEAA<br>LER.L                                                                                                                                                                                                                      |
| P07900  | HS90A        | 597         | R.LVEGTINPGETC*<br>LIIEDVVTSGSSVLE<br>TVEVLQK.E<br>K.QTIGNSC*GTIGLI<br>HAVANNQDK.L<br>R.VLGAHILGPGAG<br>EMVNEAALALEYG<br>ASC*EDIAR.V<br>R.LVSSPC*CIVTST<br>YGWTANMER.I<br>R.LVTSPC*CIVTST<br>YGWTANMER.I<br>K.LSSC*DSFTSTIN<br>ELNHCLSLR.T<br>R.AGAIAPC*EVTVP<br>AQNTGLGPEK.T | P08238  | HS90B        | 366         |                                                                                                                                                                                                                                                                               |
| P07814  | SYEP         | 92          | R.LVEGTINPGETC*<br>LIIEDVVTSGSSVLE<br>TVEVLQK.E<br>K.QTIGNSC*GTIGLI<br>HAVANNQDK.L<br>R.VLGAHILGPGAG<br>EMVNEAALALEYG<br>ASC*EDIAR.V<br>R.LVSSPC*CIVTST<br>YGWTANMER.I<br>R.LVTSPC*CIVTST<br>YGWTANMER.I<br>K.LSSC*DSFTSTIN<br>ELNHCLSLR.T<br>R.AGAIAPC*EVTVP<br>AQNTGLGPEK.T | P07900  | HS90A        | 374         |                                                                                                                                                                                                                                                                               |
| P05388  | RLA0         | 119         | R.LVEGTINPGETC*<br>LIIEDVVTSGSSVLE<br>TVEVLQK.E<br>K.QTIGNSC*GTIGLI<br>HAVANNQDK.L<br>R.VLGAHILGPGAG<br>EMVNEAALALEYG<br>ASC*EDIAR.V<br>R.LVSSPC*CIVTST<br>YGWTANMER.I<br>R.LVTSPC*CIVTST<br>YGWTANMER.I<br>K.LSSC*DSFTSTIN<br>ELNHCLSLR.T<br>R.AGAIAPC*EVTVP<br>AQNTGLGPEK.T | P05388  | RLA0         | 226         |                                                                                                                                                                                                                                                                               |
| P05141  | ADT2         | 257         | R.LVEGTINPGETC*<br>LIIEDVVTSGSSVLE<br>TVEVLQK.E<br>K.QTIGNSC*GTIGLI<br>HAVANNQDK.L<br>R.VLGAHILGPGAG<br>EMVNEAALALEYG<br>ASC*EDIAR.V<br>R.LVSSPC*CIVTST<br>YGWTANMER.I<br>R.LVTSPC*CIVTST<br>YGWTANMER.I<br>K.LSSC*DSFTSTIN<br>ELNHCLSLR.T<br>R.AGAIAPC*EVTVP<br>AQNTGLGPEK.T | P05386  | RLA1         | 61          |                                                                                                                                                                                                                                                                               |
| P04818  | TYSY         | 195         | R.LVEGTINPGETC*<br>LIIEDVVTSGSSVLE<br>TVEVLQK.E<br>K.QTIGNSC*GTIGLI<br>HAVANNQDK.L<br>R.VLGAHILGPGAG<br>EMVNEAALALEYG<br>ASC*EDIAR.V<br>R.LVSSPC*CIVTST<br>YGWTANMER.I<br>R.LVTSPC*CIVTST<br>YGWTANMER.I<br>K.LSSC*DSFTSTIN<br>ELNHCLSLR.T<br>R.AGAIAPC*EVTVP<br>AQNTGLGPEK.T | P04843  | RPN1         | 477         |                                                                                                                                                                                                                                                                               |
| P04406  | G3P          | 247         | R.LVEGTINPGETC*<br>LIIEDVVTSGSSVLE<br>TVEVLQK.E<br>K.QTIGNSC*GTIGLI<br>HAVANNQDK.L<br>R.VLGAHILGPGAG<br>EMVNEAALALEYG<br>ASC*EDIAR.V<br>R.LVSSPC*CIVTST<br>YGWTANMER.I<br>R.LVTSPC*CIVTST<br>YGWTANMER.I<br>K.LSSC*DSFTSTIN<br>ELNHCLSLR.T<br>R.AGAIAPC*EVTVP<br>AQNTGLGPEK.T | P04818  | TYSY         | 199         |                                                                                                                                                                                                                                                                               |
| P00492  | HPRT         | 23          | R.LVEGTINPGETC*<br>LIIEDVVTSGSSVLE<br>TVEVLQK.E<br>K.QTIGNSC*GTIGLI<br>HAVANNQDK.L<br>R.VLGAHILGPGAG<br>EMVNEAALALEYG<br>ASC*EDIAR.V<br>R.LVSSPC*CIVTST<br>YGWTANMER.I<br>R.LVTSPC*CIVTST<br>YGWTANMER.I<br>K.LSSC*DSFTSTIN<br>ELNHCLSLR.T<br>R.AGAIAPC*EVTVP<br>AQNTGLGPEK.T | P04406  | G3P          | 152         |                                                                                                                                                                                                                                                                               |
| P00338  | LDHA         | 293         | R.LVEGTINPGETC*<br>LIIEDVVTSGSSVLE<br>TVEVLQK.E<br>K.QTIGNSC*GTIGLI<br>HAVANNQDK.L<br>R.VLGAHILGPGAG<br>EMVNEAALALEYG<br>ASC*EDIAR.V<br>R.LVSSPC*CIVTST<br>YGWTANMER.I<br>R.LVTSPC*CIVTST<br>YGWTANMER.I<br>K.LSSC*DSFTSTIN<br>ELNHCLSLR.T<br>R.AGAIAPC*EVTVP<br>AQNTGLGPEK.T | P00395  | COX1         | 498         |                                                                                                                                                                                                                                                                               |
| O96008  | TOM40        | 74          | R.LVEGTINPGETC*<br>LIIEDVVTSGSSVLE<br>TVEVLQK.E<br>K.QTIGNSC*GTIGLI<br>HAVANNQDK.L<br>R.VLGAHILGPGAG<br>EMVNEAALALEYG<br>ASC*EDIAR.V<br>R.LVSSPC*CIVTST<br>YGWTANMER.I<br>R.LVTSPC*CIVTST<br>YGWTANMER.I<br>K.LSSC*DSFTSTIN<br>ELNHCLSLR.T<br>R.AGAIAPC*EVTVP<br>AQNTGLGPEK.T | O96011  | PX11B        | 153         |                                                                                                                                                                                                                                                                               |
| O95861  | BPNT1        | 249         | R.LVEGTINPGETC*<br>LIIEDVVTSGSSVLE<br>TVEVLQK.E<br>K.QTIGNSC*GTIGLI<br>HAVANNQDK.L<br>R.VLGAHILGPGAG<br>EMVNEAALALEYG<br>ASC*EDIAR.V<br>R.LVSSPC*CIVTST<br>YGWTANMER.I<br>R.LVTSPC*CIVTST<br>YGWTANMER.I<br>K.LSSC*DSFTSTIN<br>ELNHCLSLR.T<br>R.AGAIAPC*EVTVP<br>AQNTGLGPEK.T | O95983  | MBD3         | 172         |                                                                                                                                                                                                                                                                               |
| O95801  | TTC4         | 238         | R.LVEGTINPGETC*<br>LIIEDVVTSGSSVLE<br>TVEVLQK.E<br>K.QTIGNSC*GTIGLI<br>HAVANNQDK.L<br>R.VLGAHILGPGAG<br>EMVNEAALALEYG<br>ASC*EDIAR.V<br>R.LVSSPC*CIVTST<br>YGWTANMER.I<br>R.LVTSPC*CIVTST<br>YGWTANMER.I<br>K.LSSC*DSFTSTIN<br>ELNHCLSLR.T<br>R.AGAIAPC*EVTVP<br>AQNTGLGPEK.T | O95801  | TTC4         | 63          |                                                                                                                                                                                                                                                                               |
| O95563  | MPC2         | 54          | R.LVEGTINPGETC*<br>LIIEDVVTSGSSVLE<br>TVEVLQK.E<br>K.QTIGNSC*GTIGLI<br>HAVANNQDK.L<br>R.VLGAHILGPGAG<br>EMVNEAALALEYG<br>ASC*EDIAR.V<br>R.LVSSPC*CIVTST<br>YGWTANMER.I<br>R.LVTSPC*CIVTST<br>YGWTANMER.I<br>K.LSSC*DSFTSTIN<br>ELNHCLSLR.T<br>R.AGAIAPC*EVTVP<br>AQNTGLGPEK.T | O95801  | TTC4         | 174         |                                                                                                                                                                                                                                                                               |
| O94766  | B3GA3        | 301         | R.LVEGTINPGETC*<br>LIIEDVVTSGSSVLE<br>TVEVLQK.E<br>K.QTIGNSC*GTIGLI<br>HAVANNQDK.L<br>R.VLGAHILGPGAG<br>EMVNEAALALEYG<br>ASC*EDIAR.V<br>R.LVSSPC*CIVTST<br>YGWTANMER.I<br>R.LVTSPC*CIVTST<br>YGWTANMER.I<br>K.LSSC*DSFTSTIN<br>ELNHCLSLR.T<br>R.AGAIAPC*EVTVP<br>AQNTGLGPEK.T | O95373  | IPO7         | 757         |                                                                                                                                                                                                                                                                               |

| uniprot | protein name | site number | peptide                                           | uniprot | protein name | site number | peptide                                               |
|---------|--------------|-------------|---------------------------------------------------|---------|--------------|-------------|-------------------------------------------------------|
| O75934  | SPF27        | 106         | K.NDITAWQEC*VN<br>NSMAQLEHQAVR.I                  | O75940  | SPF30        | 214         | K.VGVGTC*GIADKP<br>MTQYQDTSK.Y                        |
| O75607  | NPM3         | 105         | K.LSC*QPMLSLDD<br>FQLQPPVTFR.L                    | O75683  | SURF6        | 189         | R.KAEATEAQEVVE<br>ATPEGAC*TEPR.E                      |
| O75400  | PR40A        | 39          | R.LSGSSL*SGSW<br>VSADGFLR.R                       | O75521  | ECI2         | 380         | R.WLSDEC*TNVAVN<br>FLSR.K                             |
| O60888  | CUTA         | 96          | R.LAAC*VNLIPQIT<br>SIYEWK.G                       | O75348  | VATG1        | 69          | R.GSC*STEVEKETQ<br>EK.M                               |
| O60706  | ABCC9        | 631         | R.TGESSLPFESC*<br>K.K                             | O60828  | PQBP1        | 60          | K.VFDPSC*GLPYW<br>NADTDLVSWLSPHD<br>PNSVVK.S          |
| O43175  | SERA         | 369         | K.NAGNC*LSPAVIV<br>GLLK.E                         | O60232  | SSA27        | 152         | K.AAQPPAPAVPPN<br>TDVMAC*TQTALLQK                     |
| O15120  | PLCB         | 248         | K.FFTSGTVTVQVL<br>EAIPTSGLTAADVP<br>ALVDT*HR.A    | O15260  | SURF4        | 32          | R.LC*LISTFLEDGIR.<br>M                                |
| O15067  | PUR4         | 1287        | R.GLAPLHWADDD<br>GNPTEQYPLNPNG<br>SPGGVAGICSC*D   | O15067  | PUR4         | 1285        | R.GLAPLHWADDDG<br>NPTEQYPLNPNGSP<br>GGVAGIC*SCDGR.H   |
| O14980  | XPO1         | 498         | K.NLNTLC*WAIGSI<br>SGAMHEEDEKR.F<br>R.STVIGPGELWM | O14980  | XPO1         | 34          | K.LDINLLDNVNC*L<br>YHGEGAQQR.M                        |
| O14654  | IRS4         | 314         | QVDDC*VVAQNMH<br>ELFLEK.M                         | O14950  | ML12B        | 109         | R.NAFAC*FDEEATG<br>TIQEDYLR.E                         |
| O00567  | NOP56        | 52          | R.LVAF*PFASSQ<br>VALENANAVSEGV<br>VHEDLR.L        | O14561  | ACPM         | 140         | K.LMC*PQEIVDYIAD<br>KK.D                              |
| O00410  | IPO5         | 733         | R.VAAAESMPLLE<br>C*AR.V                           | O00483  | NDUA4        | 44          | R.LALFNPDVC*WDR<br>.N                                 |
| O00244  | ATOX1        | 41          | K.VC*IESEHSMDTL<br>LATLK.K                        | O00264  | PGRC1        | 129         | R.GLATFC*LDKEALK<br>DEYDDLSDLTAAQQ<br>ETLSDWESQFTFK.Y |
| A3QJZ6  | PRA22        | 183         | K.FMDEDLSFFSG<br>WVQHRRGSVHLC*<br>CTKVVNYSMSILNF  | A6NDU8  | CE051        | 268         | K.YVVC*EGPLKEQ<br>EWNTTNAK.Q                          |

### Histidines

| uniprot | protein name | site number | peptide                                           | uniprot | protein name | site number | peptide                                                                    |
|---------|--------------|-------------|---------------------------------------------------|---------|--------------|-------------|----------------------------------------------------------------------------|
| Q9Y6E2  | BZW2         | 96          | K.MTNH*CVFSANE<br>DHETIR.N                        | P84243  | H33          | 114         | R.FQSAAIGALQEAS<br>EAYLVGLFEDTNLCA<br>IH*AK.R                              |
| Q9Y5U8  | MPC1         | 84          | R.NWLLFACH*ATN<br>EVAQLIQGGR.L                    | P62333  | PRS10        | 225         | R.DH*QPCIIFMDEID<br>AIGGR.R                                                |
| Q9NQV6  | PRD10        | 790         | R.KAH*ILKNHPGA<br>ELPPSIR.K                       | P61978  | HNRPK        | 137         | K.IIPTLEEGLQLPSPT<br>ATSQPLPESDAVECL<br>NYQH*YK.G                          |
| Q9BWJ5  | SF3B5        | 46          | R.DSYCSYMGH*FD<br>LLNYFAIAENESK.A                 | P60842  | IF4A1        | 132         | K.VVMALGDYMGAS<br>CH*ACIGGTNVR.A                                           |
| Q96FJ2  | DYL2         | 55          | K.YNPTWH*CIVGR.<br>N                              | P60709  | ACTB         | 275         | R.CPEALFQPSFLGM<br>ESCGIH*ETTFNSIMK                                        |
| Q8TDB4  | HUMMR        | 142         | K.EASACPGH*VEA<br>APETTAVSAETGP<br>EVTDAAR.E      | P55060  | XPO2         | 329         | K.YDLLVSNAIQFLAS<br>VCERPH*YK.N                                            |
| Q8IUR0  | TPPC5        | 39          | R.TEVSLSAFALLFS<br>ELVQH*CQSR.V                   | P43487  | RANG         | 102         | K.ICANH*YITPMMEI<br>KPNAGSDR.A                                             |
| Q7Z7H8  | RM10         | 61          | K.LMAVTEYIPPKP<br>AIH*PSCLPSPSP<br>PQEEIGLIR.L    | P35268  | RL22         | 27          | K.FTLDCTH*PVEDGI<br>MDAANFEQFLQER.I                                        |
| Q71U36  | TBA1A        | 28          | R.ECISIHVGQAGV<br>QIGNACWELCYCLE<br>H*GIQPDGQMPSD | P32119  | PRDX2        | 168         | R.LVQAFQYTDEH*G<br>EVCPCAGWKPGSDTI<br>KPNVDDSKKEYFSK.H<br>K.KLDTNSDGLDQDFS |
| Q3B7T3  | BEAN1        | 80          | R.HHHH*HHHHRR.<br>R                               | P31949  | S10AB        | 92          | EFLNLIGGLAMACH*<br>DSFLK.A                                                 |
| Q3B7T3  | BEAN1        | 79          | R.HHH*HHHHRR.<br>R                                | P27635  | RL10         | 51          | K.VDEFPLCGH*MVS<br>DEYEQLSSEALEAA<br>K.SYIEGYVPSQADV                       |
| Q16576  | RBBP7        | 96          | R.VHIPNDDAQFDA<br>SH*CDSKGEFGG<br>FGSVTGK.I       | P24534  | EF1B         | 51          | AVFEAVSSPPPADLC<br>H*ALR.W                                                 |
| Q06830  | PRDX1        | 84          | K.LNCQVIGASVDS<br>HFCH*LAWVNTPK.<br>K             | A3QJZ6  | PRA22        | 181         | K.FMDEDLSFFSGW<br>VQHRRGSVH*LCCT<br>KVVNYSMSILNFR.N                        |
| Q06830  | PRDX1        | 169         | K.H*GEVCPAGWK<br>PGSDTIKPDVQK.S                   |         |              |             |                                                                            |

### Lysines

| uniprot | protein name | site number | peptide                                                          | uniprot | protein name | site number | peptide                                                                                                      |
|---------|--------------|-------------|------------------------------------------------------------------|---------|--------------|-------------|--------------------------------------------------------------------------------------------------------------|
| Q9UJX3  | APC7         | 193         | K.AGQERPSVTSYK<br>*EVL.R.Q                                       | P68104  | EF1A1        | 408         | K.SGDAAIVDMVPGK<br>*PMCVESFSDYPPLG<br>R.F                                                                    |
| Q9BWC9  | CC106        | 261         | K.K*VQALKKSKLLL<br>PITYR.F                                       | P62910  | RL32         | 93          | K.ELEVLLMCNK*.S                                                                                              |
| Q96SK3  | ZN607        | 419         | K.KPYECNKCGKSF<br>RLNSSLKIHQNIHT<br>GEK*.P                       | P62829  | RL23         | 35          | R.ISLGLPVGAVINCA<br>DNTGAK*.N                                                                                |
| Q96ME1  | FXL18        | 450         | R.APAQPAMHAVP<br>RGFGK*.K                                        | P62280  | RS11         | 136         | R.DVQIGDIVTVGEC<br>RPLSK*.T                                                                                  |
| Q96L93  | KI16B        | 988         | K.VRK*KEK*EILES<br>REKQQREALER.A                                 | P61978  | HNRPK        | 139         | K.IIPTLEEGQLQPSPT<br>ATSQPLESDAVECL<br>NYQHYK*.G                                                             |
| Q8TEW0  | PARD3        | 994         | K.KDK*TGKEKKKD<br>RDKEK.D                                        | P55060  | XPO2         | 331         | K.YDLLVSNAIQFLAS<br>VCERPHYK*.N                                                                              |
| Q8N5K1  | CISD2        | 95          | K.VVNEINIEDLCLT<br>K*.A                                          | P50991  | TCPD         | 122         | K.AQDIEAGDGTTSV<br>VIIAGSLDSCTK*.L<br>R.ELLTEFGYKGEET<br>PVIVGSALCALEGRD<br>PELGLK*.S                        |
| Q7Z7H8  | RM10         | 57          | K.LMAVTEYIPPK*P<br>AIHPSCLPSPSPSP<br>QEEIGLIR.L                  | P49411  | EFTU         | 234         | K.IQAEHSESGQLVG<br>VDLNTGPEMVAAEV<br>GVWDNYCVK*.K                                                            |
| Q71U36  | TBA1A        | 352         | R.TIQFVDWCPTGF<br>K*.V                                           | P40227  | TCPZ         | 501         | R.RWHLQGVLGWNP<br>K*.Y                                                                                       |
| Q71U36  | TBA1A        | 124         | R.K*LADQCTGLQG<br>FLVFHSGGGTGS<br>GFTSLLMER.L<br>K.EIEQK*YDCGEEI | P32241  | VIPR1        | 417         | K.KLDTNSDGLDIFS<br>EFLNLIGGLAMACHD<br>SFLK*.A                                                                |
| Q6IS14  | IF5AL        | 126         | LITVLSAMTEEAAV<br>AIK.A                                          | P31949  | S10AB        | 97          | K.DNTIEHLLPLFLAQ<br>LK*DECPEVR.L                                                                             |
| Q4G0J3  | LARP7        | 81          | K.MK*KLTTDGG.L                                                   | P30153  | 2AAA         | 374         | R.GLATFCLDKEALK*<br>DEYDDLSDLTAAQQ<br>ETLSDWESQFTFK.Y<br>K.FMDEDLSFFSGW<br>VQHRRGVSVHLCTK<br>*VVNYSMSILNFR.N |
| Q13748  | TBA3C        | 304         | K.AYHEQLSVAEIT<br>NACFEPANQMVK*.<br>C                            | O00264  | PGRC1        | 136         |                                                                                                              |
| P84243  | H33          | 116         | R.FQSAAIQALQEA<br>SEAYLVGLFEDTNL<br>CAIHAK*.R                    | A3QJZ6  | PRA22        | 186         |                                                                                                              |
| P68431  | H31          | 116         | R.FQSSAVMALQE<br>ACEAYLVGLFEDT<br>NLCAIHAK*.R                    |         |              |             |                                                                                                              |
